# Supplementary material for: Frequent somatic transfer of mitochondrial DNA into the nuclear genome of human cancer cells
Source: PubMed Central journal article supplement (PMC4448678; doi:10.1101/gr.190470.115), 2015-06
Supplement: supp_gr.190470.115_Supp_Figure3.pdf [file supp_gr.190470.115_Supp_Figure3.pdf]

**A**

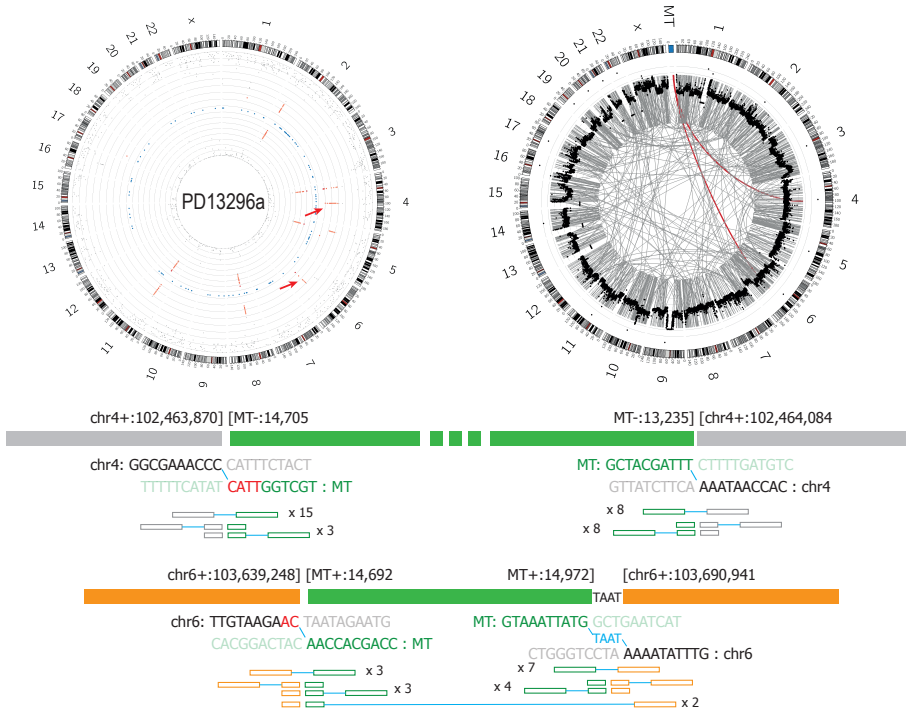

**B**

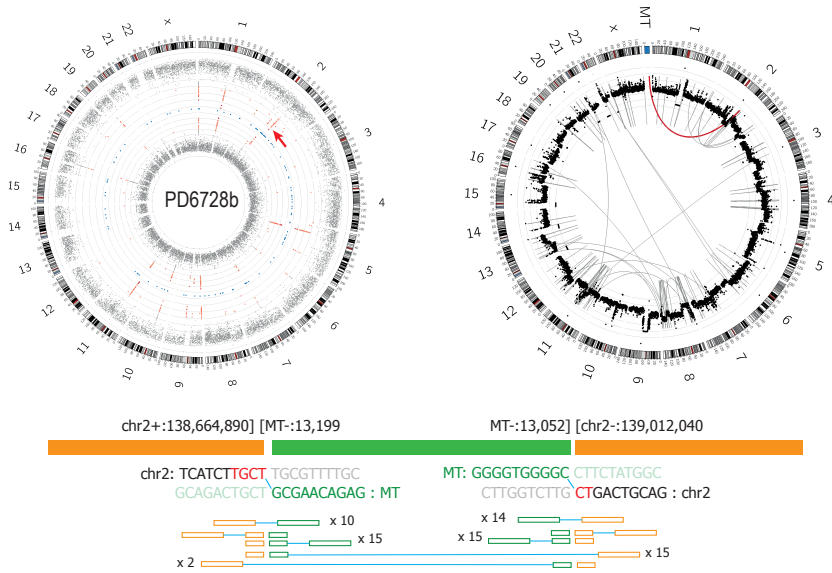

**Supplemental Figure 3 | Genome and sequence context of mtDNA nuclear transfer events.** Genome-wide discordant read clusters (first circos plot), chromosomal rearrangements (second circos plot), nucleotide-resolution mitochondrial-nuclear DNAbreakpoint junctions with microhomology (red letters) and number of supporting reads are graphically shown. (A) for PD13296a. (B) for PD6728b.
