# Supplementary material for: Frequent somatic transfer of mitochondrial DNA into the nuclear genome of human cancer cells
Source: Genome Res. 2015 Jun;25(6):814–24. doi: 10.1101/gr.190470.115 (PMC4448678; doi:10.1101/gr.190470.115)
Supplement: Supplemental Material [file supp_gr.190470.115_Supplemental_Material.docx]

**Supplemental Material**

Frequent somatic transfer of mitochondrial DNA into the nuclear genome of human cancer cells

Young Seok Ju, Jose M. C. Tubio, William Mifsud, Beiyuan Fu, Helen R. Davies, Manasa Ramakrishna, Yilong Li, Lucy Yates, Gunes Gundem, Patrick S. Tarpey, Sam Behjati, Elli Papaemmanuil, Sancha Martin, Anthony Fullam, Moritz Gerstung, ICGC Prostate Cancer Working Group, ICGC Bone Cancer Working Group, ICGC Breast Cancer Working Group, Jyoti Nangalia, Anthony R. Green, Carlos Caldas, Åke Borg, Andrew Tutt, Ming Ta Michael Lee, Laura J. van't Veer, Benita K. T. Tan, Sam Aparicio, Paul N. Span, John W.M. Martens, Stian Knappskog, Anne Vincent-Salomon, Anne-Lise Børresen-Dale, Jórunn Erla Eyfjörd, Adrienne M Flanagan, Christopher Foster, David E. Neal, Colin Cooper, Rosalind Eeles, Sunil R. Lakhani, Christine Desmedt, Gilles Thomas, Andrea L. Richardson, Colin A. Purdie, Alastair M. Thompson, Ultan McDermott, Fengtang Yang, Serena Nik-Zainal, Peter J. Campbell and Michael R. Stratton

**Contents**

**- Supplemental Text**

1. Novel germline mitochondrial sequence in the nuclear genome ----------------- 3
2. Frequent nuclear transfer of mtDNA in human cancer cells -------------------------- 3

**- Supplemental Tables**

1. Supp.Table.1: Sample and sequencing information ----------------------------------- 5
2. Supp.Table.3: Novel germline mtDNA sequences in the nucleus (Numts) -------- 5
3. Supp.Table.3: Primer sequences ----------------------------------------------------- 6
4. Association between mtDNA integration and transposable elements ---------------- 7

**- Ethical approval and the lists of ICGC working group participants**

1. Ethical Approval ----------------------------------------------------------------------- 8

2. ICGC Prostate cancer working group ----------------------------------------------------- 9

2. ICGC Breast cancer working group ----------------------------------------------------- 10

**Supplemental Text**

Novel germline mitochondrial sequence in the nuclear genome

In addition to the somatic transfers, we found 55 previously unreported mtDNA nuclear integrations that were shared between cancer and normal tissues from the same individual. 63.6% (n=35) of these integrations were found in only one individual and the population allele frequency for 98.2% of them (n=54) was 0.5% or less. Most are therefore likely to have taken place in the germline during recent human evolution (Supplemental Table 3). Almost all were simple insertions into the nuclear genome. However, one, which is shared by four samples, was combined with a tandem duplication of 22.3kb of nuclear DNA (Supplemental Fig. 9). The results indicate that nuclear transfer of mtDNA is ongoing in the human germline and, in some instances, is closely associated with intranuclear structural changes, similar to the observations reported here in somatic cells.

Frequent nuclear transfer of mtDNA in human cancer cells

We observe a much higher rate of mitochondrial DNA fusion to the nuclear genome in human somatic cells than in the human germline. With about 1000 cell divisions from the fertilized egg to the progenitor cell of the dominant cancer cell clone, the rate of somatic nuclear mtDNA fusion appears to be 2 x 10-5 event per cell per cell generation (pcpg), which is at least several hundreds times higher than the rate observed in the human germline (5 x 10-8 pcpg) across the evolution (Hazkani-Covo et al. 2010) (Methods).

Assuming that the intrinsic rates of double strand break generation and of ligation to a break in a different chromosome are similar for mitochondrial and nuclear DNA, our findings indicate that physical escape of mtDNA to make contact with nuclear DNA is frequent in some human somatic cells. Under conservative assumptions i) that >10% of mtDNA which escapes is integrated with nuclear DNA, and ii) that the rate of escape is constant during these cell divisions, the results suggest more than one mtDNA escape to the nucleus in 5,000 cell generations (2×10-4 pcpg). If the escape is a cancer cell specific phenomenon, its rate must be substantially higher. Our estimated escape frequency in human cells appears to be comparable to the rate observed in *Saccharomyces cerevisiae*(Thorsness et al. 1990)(2×10-5 pcpg) and to the rate of nuclear migration of chloroplast DNA in tobacco plants (~10-4 pcpg; Huang et al. 2003).

**Supplemental Tables**

**Supp. Table 1.** Sample and sequencing information of 559 primary and 28 cell-line tumor-normal pairs.

Ju_TableS1_SamplesInfo_withAccession.xlsx

Depicted below is a thumbnail of the file.

**
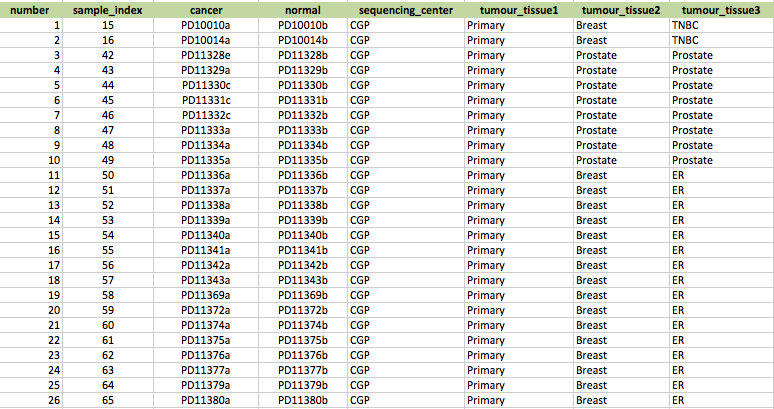
**

**Supp. Table 2.** List of novel germline mtDNA sequences in human nuclear genome.

Ju_TableS2_Inherited_mtDNA.xlsx

Depicted below is a thumbnail of the file.

**
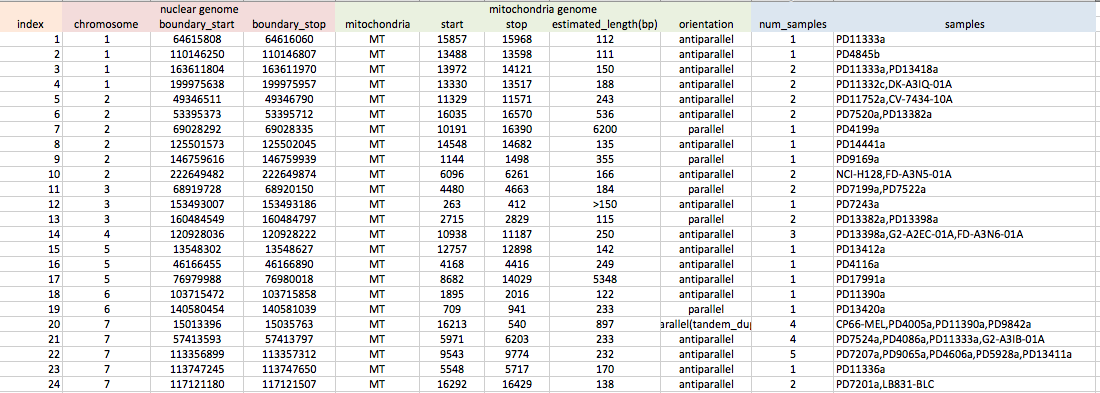
**

**Supp. Table 3.** Primer sequences for PCR validations.

Ju_TableS3_PrimerSequences.xlsx

Depicted below is a thumbnail of the file.


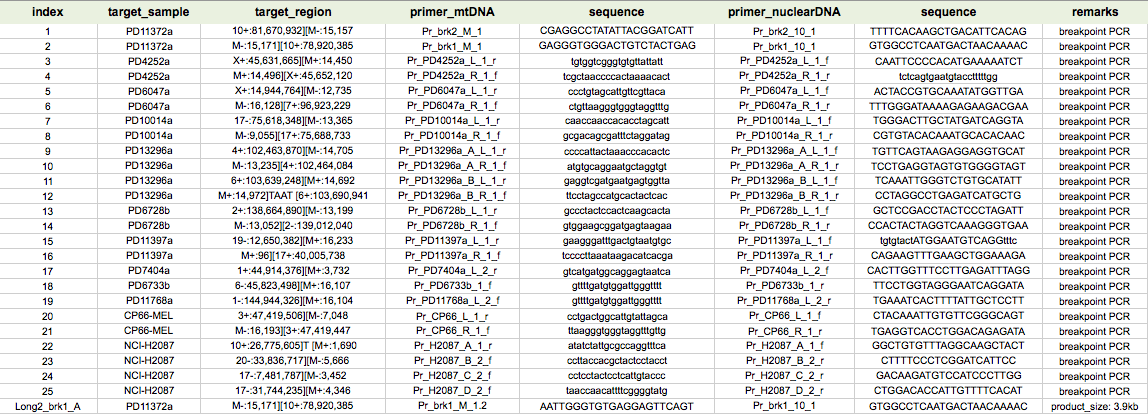


**Supp. Table 4.** Association between mtDNA integration and transposable elements.

Ju_TableS4_mtDNAinsertions_and_transposableelements.xlsx

Depicted below is a thumbnail of the file.

**
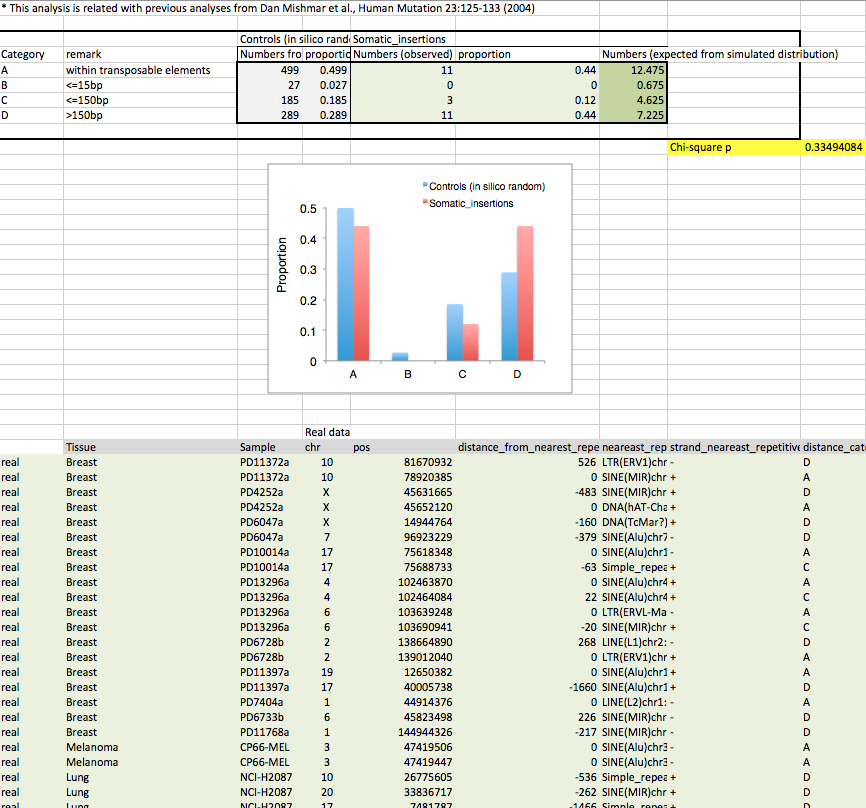
 Ethical approval references**

Genome Analysis of myeloid and lymphoid malignancies (10/H0306/40)

Genomic Analysis of Mesothelioma (11/EE/0444)

Myeloid and lymphoid cancer genome analysis (07/S1402/90)

The Treatment of Down Syndrome Children with Acute Myeloid Leukemia and Myelodysplastic Syndrome(AAML0431)

CLL (chronic lymphocytic leukaemia) genome analysis (07/Q0104/3)

Cancer Genome Project - Global approaches to characterising the molecular basis of paediatric ependymoma

(05/MRE04/70)

PREDICT-Cohort (09/H0801/96)

ICGC Prostate (Evaluation of biomarkers in urological diseases) (LREC 03/018)

ICGC Prostate (779) (Prostate Complex CRUK Sample Cohort) (MREC/01/4/061)

ICGC Prostate (Tissue collection at radical prostatectomy) (CRE-2011.373)

Somatic molecular genetics of human cancers, melanoma and myeloma (Dana Farber Cancer Institute)(08/H0308/303)

Breast Cancer Genome Analysis for the International Cancer Genome Consortium Working Group (09/H0306/36)

Genome analysis of tumours of the bone (09/H0308/165)

**Participants in ICGC prostate cancer working group**

Colin Cooper1,2,16, Rosalind Eeles1,3,16, David Wedge4, Peter Van Loo4,5, Gunes Gundem4, Ludmil Alexandrov4, Barbara Kremeyer4, Adam Butler4, Andrew Lynch6, Sandra Edwards1, Niedzica Camacho1, Charlie Massie7, ZSofia Kote-Jarai1, Nening Dennis3, Sue Merson1, Jorge Zamora4, Jonathan Kay7, Cathy Corbishley8, Sarah Thomas3, Serena Nik-Zainai4, Sarah O’Meara4, Lucy Matthews1, Jeremy Clark2, Rachel Hurst2, Richard Mithen9, Susanna Cooke4, Keiran Raine4, David Jones4, Andrew Menzies4, Lucy Stebbings4, Jon Hinton4, Jon Teague4, Stuart McLaren4, Laura Mudie4, Claire Hardy4, Elizabeth Anderson4, Olivia Joseph4, Victoria Goody4, Ben Robinson4, Mark Maddison4, Stephen Gamble4, Christopher Greenman10, Dan Berney11, Steven Hazell3, Naomi Livni3, Cyril Fisher3, Christopher Ogden3, Pardeep Kumar3, Alan Thompson3, Christopher Woodhouse3, David Nicol3, Erik Mayer3, Tim Dudderidge3, Nimish Shah7, Vincent Gnanapragasam7, Peter Campbell4, Andrew Futreal4,16, Douglas Easton12,16, Anne Y Warren13,Christopher Foster14,16, Michael Stratton4,16, Hayley Whitaker7, Ultan McDermott4,16, Daniel Brewer1,2, David Neal7,15,16.

**Affiliations**

1Division of Genetics and Epidemiology, The Institute Of Cancer Research, Sutton, UK

2Department of Biological Sciences and School of Medicine, University of East Anglia, Norwich, UK

3Royal Marsden NHS Foundation Trust, London and Sutton, UK

4Cancer Genome Project, Wellcome Trust Sanger Institute, Hinxton, UK

5Human Genome Laboratory, Department of Human Genetics, VIB and KU Leuven, Leuven, Belgium

6Statistics and Computational Biology Laboratory, Cancer Research UK Cambridge Research Institute, Cambridge, UK

7Urological Research Laboratory, Cancer Research UK Cambridge Research Institute, Cambridge, UK

8Department of Histopathology, St Georges Hospital, London, UK

9Institute of Food Research, Norwich Research Park, Norwich, UK

10School of Computing Sciences, University of East Anglia, Norwich, UK

11Department of Molecular Oncology, Barts Cancer Centre, Barts and the London School of Medicine and Dentistry, London, UK

12Centre for Cancer Genetic Epidemiology, Department of Oncology, University of Cambridge, Cambridge, UK

13Department of Histopathology, Cambridge University Hospitals NHS Foundation Trust, Cambridge, UK

14Bostwick Laboratories, London, UK

15Department of Surgical Oncology, University of Cambridge, Addenbrooke's Hospital, Cambridge, UK

16Senior Principal Investigators of the Cancer Research UK funded ICGC Prostate Cancer Project

**Participants in ICGC breast cancer working group**

Elena Provenzano1, Marc van de Vijver2, Andrea L Richardson3,4, Colin Purdie5, Sarah Pinder6, Gaetan MacGrogan7, Anne Vincent-Salomon8,9, Denis Larsimont10, Dorthe Grabau11, Torill Sauer12, Øystein Garred12, Anna Ehinger13, Gert G Van den Eynden14, C.H.M. van Deurzen15, Roberto Salgado29, Jane E Brock4, Sunil R Lakhani16,17,18, Dilip D Giri19, Laurent Arnould20, Jocelyne Jacquemier21, Isabelle Treilleux22, Carlos Caldas1,23, Suet-Feung Chin23, Aquila Fatima3, Alastair M Thompson24, Alasdair Stenhouse24, John Foekens25, John Martens25, Anieta Sieuwerts25, Arjen Brinkman26, Henk Stunnenberg26, Paul N. Span27, Fred Sweep28, Christine Desmedt29, Christos Sotiriou29, Gilles Thomas30, Annegein Broeks31, Anita Langerod32, Samuel Aparicio33, Peter Simpson18, Laura van 't Veer34,35, Jórunn Erla Eyfjörd36, Holmfridur Hilmarsdottir36, Jon G Jonasson37,38, Anne-Lise Børresen-Dale32,39, Ming Ta Michael Lee40, Bernice Huimin Wong41, Benita Kiat Tee Tan42, Gerrit K.J. Hooijer2, Andrew Tutt43

**Affiliations**

1Cambridge Breast Unit, Addenbrooke’s Hospital, Cambridge University Hospital NHS Foundation Trust and NIHR Cambridge Biomedical Research Centre, Cambridge CB2 2QQ, UK

2Department of Pathology, Academic Medical Center, Meibergdreef 9, 1105 AZ Amsterdam, The Netherlands

3Department of Cancer Biology, Dana-Farber Cancer Institute, 450 Brookline Ave., Boston, Massachusetts 02215, USA

4Department of Pathology, Brigham and Women's Hospital, Harvard Medical School, 75 Francis St., Boston, Massachusetts 02115, USA.

5East of Scotland Breast Service, Ninewells Hospital, Dundee, United Kingdom

6Department of Research Oncology, Guy’s Hospital, King’s Health Partners AHSC, King’s College London School of Medicine, London SE1 9RT, UK

7Institut Bergonié, 229 cours de l’Argone, 33076, Bordeaux, France

8Institut Curie, Department of Tumor Biology, 26 rue d’Ulm, 75248 Paris cédex 05, France.

9Institut Curie, INSERM Unit 830, 26 rue d’Ulm, 75248 Paris cédex 05, France

10Department of Pathology, Jules Bordet Institute, Brussels 1000, Belgium

11Department of Pathology, Skåne University Hospital, Lund University, SE-221 85 Lund, Sweden

12Department of Pathology, Oslo University Hospital Ulleval and University of Oslo, Faculty of Medicine and Institute of Clinical Medicine, Oslo, Norway.

13Department of Gynecology & Obstetrics, Department of Clinical Sciences, Lund University, Skåne University Hospital Lund, SE-221 85 Lund, Sweden

14Translational Cancer Research Unit, GZA Hospitals St.-Augustinus, Antwerp, Belgium.

15Department of Pathology, Erasmus Medical Center, Rotterdam, the Netherlands.

16The University of Queensland, School of Medicine, Herston, Brisbane, QLD 4006, Australia

17Pathology Queensland: The Royal Brisbane & Women’s Hospital, Brisbane, QLD 4029, Australia

18The University of Queensland, UQ Centre for Clinical Research, Herston, Brisbane, QLD 4029, Australia

19Department of Pathology, Memorial Sloan-Kettering Cancer Center, New York, NY, USA

20Centre Georges-François Leclerc, 1 rue du Professeur Marion, 21079, Dijon, France

21Institut Paoli Calmettes, biopathology department, 232 Bd Ste Marguerite, 13009, Marseille, France

22Centre Léon Bérard, Lyon, France; Université Claude Bernard Lyon1 - Université de Lyon, Lyon, France.

23Department of Oncology, University of Cambridge and Cancer Research UK Cambridge Research Institute, Li Ka Shin Centre, Cambridge CB2 0RE

24Department of Surgical Oncology, University of Texas MD Anderson Cancer Center, Houston, Texas, USA.

25Erasmus MC Cancer Institute, Erasmus University Medical Center, Rotterdam, The Netherlands.

26Radboud University, Department of Molecular Biology, Faculty of Science, Nijmegen Centre for Molecular Life Sciences, 6500 HB Nijmegen, The Netherlands.

27Department of Radiation Oncology, Radboud University Medical Centre, Nijmegen, The Netherlands

28Department of Laboratory Medicine, Radboud University Medical Centre, Nijmegen, The Netherlands

29Breast Cancer Translational Research Laboratory, Institut Jules Bordet, Université Libre de Bruxelles, Brussels, Belgium

30Universite Lyon1, INCa-Synergie, Centre Leon Berard, 28 rue Laennec Lyon Cedex 08 France

31Department Experimental Therapy, The Netherlands Cancer Institute, Plesmanlaan 121, 1066 CX Amsterdam, The Netherlands

32Department of Genetics, Institute for Cancer Research, The Norwegian Radium Hospital, Oslo University Hospital, O310 Oslo, Norway

33Department of Molecular Oncology, BC Cancer Agency, 675 W10th Avenue, Vancouver V5Z 1L3

34The Netherlands Cancer Institute, Division of Molecular Carcinogenesis, Amsterdam, The Netherlands.

35Department of Surgery, University of California, San Francisco, San Francisco, California, United States of America.

36Cancer Research Laboratory, Faculty of Medicine, University of Iceland, Reykjavik, Iceland

37Department of Pathology, University Hospital, Reykjavik, Iceland

38Icelandic Cancer Registry, Icelandic Cancer Society, Skogarhlid 8, P.O.Box 5420, 125, Reykjavik, Iceland

39 The K.G. Jebsen Center for Breast Cancer Research, Institute for Clinical Medicine, Faculty of Medicine, University of Oslo, Norway

40Laboratory for International Alliance on Genomic Research, RIKEN Center for Integrative Medical Sciences, Yokohama, Japan

41NCCS-VARI Translational Research Laboratory, National Cancer Centre Singapore, 11 Hospital Drive, 169610, Singapore

42Department of General Surgery, Singapore General Hospital, Singapore

43 Breakthrough Breast Cancer Research Unit, Research Oncology, King’s College London, Guy’s Hospital, London SE1 9RT, UK.
