# Supplementary material for: Frequent somatic transfer of mitochondrial DNA into the nuclear genome of human cancer cells
Source: Genome Res. 2015 Jun;25(6):814–24. doi: 10.1101/gr.190470.115 (PMC4448678; doi:10.1101/gr.190470.115)
Supplement: Supplemental Material [file supp_gr.190470.115_Table_S1.xlsx]

## Sheet: Sheet1
sorting_order	sample_index(ysj)	mtDNAinsertion	cancer	normal	sequencing_center	tumour_tissue1	tumour_tissue2	tumour_tissue3	Dataset_Accession	Normal Sample Accession	Dataset_Accession	Study_Accession
2	16	yes	PD10014a	PD10014b	CGP	Primary	Breast	TNBC	EGAN00001087643	EGAN00001087684	EGAD00001001350	EGAS00001001234
20	59	yes	PD11372a	PD11372b	CGP	Primary	Breast	ER	EGAN00001088408	EGAN00001088339	EGAD00001001350	EGAS00001001234
131	456	yes	PD4252a	PD4252b	CGP	Primary	Breast	TNBC	EGAN00001012427	EGAN00001013185	EGAD00001001351	EGAS00001001234
218	800	yes	PD6047a	PD6047b	CGP	Primary	Breast	TNBC	EGAN00001030806	EGAN00001030807	EGAD00001001348	EGAS00001001234
277	1117	yes	PD7404a	PD7404b	CGP	Primary	Breast	HER2	EGAN00001030455	EGAN00001042963	EGAD00001001353	EGAS00001001234
445	7044	yes	PD13296a	PD13296b	CGP	Primary	Breast	TNBC	EGAN00001106126	EGAN00001106145	EGAD00001001348	EGAS00001001234
457	7056	yes	PD6728b	PD6728a	CGP	Primary	Breast	TNBC	EGAN00001030849	EGAN00001030848	EGAD00001001348	EGAS00001001234
459	7058	yes	PD6733b	PD6733a	CGP	Primary	Breast	TNBC	EGAN00001030859	EGAN00001030858	EGAD00001001348	EGAS00001001234
477	7076	yes	PD11397a	PD11397b	CGP	Primary	Breast	ER	EGAN00001105313	EGAN00001105354	EGAD00001001350	EGAS00001001234
486	7085	yes	PD11768a	PD11768b	CGP	Primary	Breast	ER	EGAN00001174372	EGAN00001174463	EGAD00001001350	EGAS00001001234
564	8005	yes	CP66-MEL	CP66-EBV	CGP	Cell-line	melanoma	melanoma	EGAN00001029450	EGAN00001029479	EGAD00001001349	EGAS00001001234
580	8021	yes	NCI-H2087	NCI-BL2087	CGP	Cell-line	Lung	adenocarcinoma	EGAN00001029471	EGAN00001029500	EGAD00001001349	EGAS00001001234
1	15	no	PD10010a	PD10010b	CGP	Primary	Breast	TNBC	-	-	-	-
3	42	no	PD11328e	PD11328b	CGP	Primary	Prostate	Prostate	-	-	-	-
4	43	no	PD11329a	PD11329b	CGP	Primary	Prostate	Prostate	-	-	-	-
5	44	no	PD11330c	PD11330b	CGP	Primary	Prostate	Prostate	-	-	-	-
6	45	no	PD11331c	PD11331b	CGP	Primary	Prostate	Prostate	-	-	-	-
7	46	no	PD11332c	PD11332b	CGP	Primary	Prostate	Prostate	-	-	-	-
8	47	no	PD11333a	PD11333b	CGP	Primary	Prostate	Prostate	-	-	-	-
9	48	no	PD11334a	PD11334b	CGP	Primary	Prostate	Prostate	-	-	-	-
10	49	no	PD11335a	PD11335b	CGP	Primary	Prostate	Prostate	-	-	-	-
11	50	no	PD11336a	PD11336b	CGP	Primary	Breast	ER	-	-	-	-
12	51	no	PD11337a	PD11337b	CGP	Primary	Breast	ER	-	-	-	-
13	52	no	PD11338a	PD11338b	CGP	Primary	Breast	ER	-	-	-	-
14	53	no	PD11339a	PD11339b	CGP	Primary	Breast	ER	-	-	-	-
15	54	no	PD11340a	PD11340b	CGP	Primary	Breast	ER	-	-	-	-
16	55	no	PD11341a	PD11341b	CGP	Primary	Breast	ER	-	-	-	-
17	56	no	PD11342a	PD11342b	CGP	Primary	Breast	ER	-	-	-	-
18	57	no	PD11343a	PD11343b	CGP	Primary	Breast	ER	-	-	-	-
19	58	no	PD11369a	PD11369b	CGP	Primary	Breast	ER	-	-	-	-
21	60	no	PD11374a	PD11374b	CGP	Primary	Breast	ER	-	-	-	-
22	61	no	PD11375a	PD11375b	CGP	Primary	Breast	ER	-	-	-	-
23	62	no	PD11376a	PD11376b	CGP	Primary	Breast	ER	-	-	-	-
24	63	no	PD11377a	PD11377b	CGP	Primary	Breast	ER	-	-	-	-
25	64	no	PD11379a	PD11379b	CGP	Primary	Breast	ER	-	-	-	-
26	65	no	PD11380a	PD11380b	CGP	Primary	Breast	ER	-	-	-	-
27	66	no	PD11381a	PD11381b	CGP	Primary	Breast	ER	-	-	-	-
28	67	no	PD11382a	PD11382b	CGP	Primary	Breast	ER	-	-	-	-
29	68	no	PD11383a	PD11383b	CGP	Primary	Breast	ER	-	-	-	-
30	69	no	PD11384a	PD11384b	CGP	Primary	Breast	ER	-	-	-	-
31	74	no	PD11394a	PD11394b	CGP	Primary	Breast	ER	-	-	-	-
32	75	no	PD11396a	PD11396b	CGP	Primary	Breast	ER	-	-	-	-
33	76	no	PD11398a	PD11398b	CGP	Primary	Breast	ER	-	-	-	-
34	77	no	PD11399a	PD11399b	CGP	Primary	Breast	ER	-	-	-	-
35	81	no	PD11406a	PD11406b	CGP	Primary	MPD	MPD	-	-	-	-
36	86	no	PD11471a	PD11471b	CGP	Primary	MPD	MPD	-	-	-	-
37	91	no	PD11818a	PD11818b	CGP	Primary	Breast	ER	-	-	-	-
38	92	no	PD11819a	PD11819b	CGP	Primary	Breast	ER	-	-	-	-
39	94	no	PD12337a	PD12337b	CGP	Primary	Prostate	Prostate	-	-	-	-
40	125	no	PD12807a	PD12807b	CGP	Primary	Prostate	Prostate	-	-	-	-
41	127	no	PD12809a	PD12809b	CGP	Primary	Prostate	Prostate	-	-	-	-
42	129	no	PD12811a	PD12811b	CGP	Primary	Prostate	Prostate	-	-	-	-
43	130	no	PD12812a	PD12812b	CGP	Primary	Prostate	Prostate	-	-	-	-
44	131	no	PD12813a	PD12813b	CGP	Primary	Prostate	Prostate	-	-	-	-
45	132	no	PD12814a	PD12814b	CGP	Primary	Prostate	Prostate	-	-	-	-
46	133	no	PD12815a	PD12815b	CGP	Primary	Prostate	Prostate	-	-	-	-
47	134	no	PD12816a	PD12816b	CGP	Primary	Prostate	Prostate	-	-	-	-
48	135	no	PD12817a	PD12817b	CGP	Primary	Prostate	Prostate	-	-	-	-
49	136	no	PD12818a	PD12818b	CGP	Primary	Prostate	Prostate	-	-	-	-
50	137	no	PD12819a	PD12819b	CGP	Primary	Prostate	Prostate	-	-	-	-
51	138	no	PD12820a	PD12820b	CGP	Primary	Prostate	Prostate	-	-	-	-
52	139	no	PD12821a	PD12821b	CGP	Primary	Prostate	Prostate	-	-	-	-
53	140	no	PD12822a	PD12822b	CGP	Primary	Prostate	Prostate	-	-	-	-
54	141	no	PD12823a	PD12823b	CGP	Primary	Prostate	Prostate	-	-	-	-
55	142	no	PD12824a	PD12824b	CGP	Primary	Prostate	Prostate	-	-	-	-
56	143	no	PD12825a	PD12825b	CGP	Primary	Prostate	Prostate	-	-	-	-
57	144	no	PD12826a	PD12826b	CGP	Primary	Prostate	Prostate	-	-	-	-
58	145	no	PD12827a	PD12827b	CGP	Primary	Prostate	Prostate	-	-	-	-
59	146	no	PD12828a	PD12828b	CGP	Primary	Prostate	Prostate	-	-	-	-
60	147	no	PD12829a	PD12829b	CGP	Primary	Prostate	Prostate	-	-	-	-
61	148	no	PD12830a	PD12830b	CGP	Primary	Prostate	Prostate	-	-	-	-
62	150	no	PD12832a	PD12832b	CGP	Primary	Prostate	Prostate	-	-	-	-
63	151	no	PD12834a	PD12834b	CGP	Primary	Prostate	Prostate	-	-	-	-
64	152	no	PD12835a	PD12835b	CGP	Primary	Prostate	Prostate	-	-	-	-
65	153	no	PD12836a	PD12836b	CGP	Primary	Prostate	Prostate	-	-	-	-
66	154	no	PD12837a	PD12837b	CGP	Primary	Prostate	Prostate	-	-	-	-
67	155	no	PD12838a	PD12838b	CGP	Primary	Prostate	Prostate	-	-	-	-
68	156	no	PD12839a	PD12839b	CGP	Primary	Prostate	Prostate	-	-	-	-
69	159	no	PD12844a	PD12844b	CGP	Primary	Prostate	Prostate	-	-	-	-
70	160	no	PD12845a	PD12845b	CGP	Primary	Prostate	Prostate	-	-	-	-
71	173	no	PD13381a	PD13381b	CGP	Primary	Prostate	Prostate	-	-	-	-
72	174	no	PD13382a	PD13382b	CGP	Primary	Prostate	Prostate	-	-	-	-
73	175	no	PD13383a	PD13383b	CGP	Primary	Prostate	Prostate	-	-	-	-
74	176	no	PD13384a	PD13384b	CGP	Primary	Prostate	Prostate	-	-	-	-
75	177	no	PD13386a	PD13386b	CGP	Primary	Prostate	Prostate	-	-	-	-
76	178	no	PD13387a	PD13387b	CGP	Primary	Prostate	Prostate	-	-	-	-
77	179	no	PD13388a	PD13388b	CGP	Primary	Prostate	Prostate	-	-	-	-
78	180	no	PD13389a	PD13389b	CGP	Primary	Prostate	Prostate	-	-	-	-
79	181	no	PD13390a	PD13390b	CGP	Primary	Prostate	Prostate	-	-	-	-
80	182	no	PD13391a	PD13391b	CGP	Primary	Prostate	Prostate	-	-	-	-
81	183	no	PD13392a	PD13392b	CGP	Primary	Prostate	Prostate	-	-	-	-
82	184	no	PD13394a	PD13394b	CGP	Primary	Prostate	Prostate	-	-	-	-
83	185	no	PD13395a	PD13395b	CGP	Primary	Prostate	Prostate	-	-	-	-
84	186	no	PD13396a	PD13396b	CGP	Primary	Prostate	Prostate	-	-	-	-
85	187	no	PD13397a	PD13397b	CGP	Primary	Prostate	Prostate	-	-	-	-
86	188	no	PD13398a	PD13398b	CGP	Primary	Prostate	Prostate	-	-	-	-
87	189	no	PD13400a	PD13400b	CGP	Primary	Prostate	Prostate	-	-	-	-
88	191	no	PD13402a	PD13402b	CGP	Primary	Prostate	Prostate	-	-	-	-
89	192	no	PD13403a	PD13403b	CGP	Primary	Prostate	Prostate	-	-	-	-
90	193	no	PD13404a	PD13404b	CGP	Primary	Prostate	Prostate	-	-	-	-
91	194	no	PD13405a	PD13405b	CGP	Primary	Prostate	Prostate	-	-	-	-
92	195	no	PD13406a	PD13406b	CGP	Primary	Prostate	Prostate	-	-	-	-
93	196	no	PD13407a	PD13407b	CGP	Primary	Prostate	Prostate	-	-	-	-
94	197	no	PD13408a	PD13408b	CGP	Primary	Prostate	Prostate	-	-	-	-
95	198	no	PD13409a	PD13409b	CGP	Primary	Prostate	Prostate	-	-	-	-
96	199	no	PD13410a	PD13410b	CGP	Primary	Prostate	Prostate	-	-	-	-
97	200	no	PD13411a	PD13411b	CGP	Primary	Prostate	Prostate	-	-	-	-
98	201	no	PD13412a	PD13412b	CGP	Primary	Prostate	Prostate	-	-	-	-
99	276	no	PD3851a	PD3851b	CGP	Primary	Breast	unknown	-	-	-	-
100	285	no	PD3890a	PD3890b	CGP	Primary	Breast	unknown	-	-	-	-
101	286	no	PD3904a	PD3904b	CGP	Primary	Breast	unknown	-	-	-	-
102	287	no	PD3905a	PD3905b	CGP	Primary	Breast	unknown	-	-	-	-
103	288	no	PD3916a	PD3916b	CGP	Primary	CLL	CLL	-	-	-	-
104	289	no	PD3917a	PD3917b	CGP	Primary	CLL	CLL	-	-	-	-
105	290	no	PD3918a	PD3918b	CGP	Primary	CLL	CLL	-	-	-	-
106	291	no	PD3945a	PD3945b	CGP	Primary	Breast	unknown	-	-	-	-
107	325	no	PD3989a	PD3989b	CGP	Primary	Breast	ER	-	-	-	-
108	341	no	PD4005a	PD4005b	CGP	Primary	Breast	unknown	-	-	-	-
109	342	no	PD4006a	PD4006b	CGP	Primary	Breast	unknown	-	-	-	-
110	343	no	PD4007a	PD4007b	CGP	Primary	MPD	MPD	-	-	-	-
111	356	no	PD4020a	PD4020b	CGP	Primary	ALL	ALL	-	-	-	-
112	379	no	PD4069a	PD4069b	CGP	Primary	Breast	ER	-	-	-	-
113	381	no	PD4072a	PD4072b	CGP	Primary	Breast	ER	-	-	-	-
114	384	no	PD4080a	PD4080b	CGP	Primary	Breast	ER	-	-	-	-
115	387	no	PD4085a	PD4085b	CGP	Primary	Breast	unknown	-	-	-	-
116	388	no	PD4086a	PD4086b	CGP	Primary	Breast	TNBC	-	-	-	-
117	390	no	PD4088a	PD4088b	CGP	Primary	Breast	unknown	-	-	-	-
118	400	no	PD4103a	PD4103b	CGP	Primary	Breast	unknown	-	-	-	-
119	404	no	PD4107a	PD4107b	CGP	Primary	Breast	TNBC	-	-	-	-
120	406	no	PD4109a	PD4109b	CGP	Primary	Breast	TNBC	-	-	-	-
121	411	no	PD4115a	PD4115b	CGP	Primary	Breast	unknown	-	-	-	-
122	412	no	PD4116a	PD4116b	CGP	Primary	Breast	unknown	-	-	-	-
123	415	no	PD4120a	PD4120b	CGP	Primary	Breast	unknown	-	-	-	-
124	437	no	PD4190a	PD4190b	CGP	Primary	CLL	CLL	-	-	-	-
125	439	no	PD4194a	PD4194b	CGP	Primary	Breast	unknown	-	-	-	-
126	443	no	PD4198a	PD4198b	CGP	Primary	Breast	unknown	-	-	-	-
127	444	no	PD4199a	PD4199b	CGP	Primary	Breast	unknown	-	-	-	-
128	451	no	PD4224a	PD4224b	CGP	Primary	Breast	ER	-	-	-	-
129	452	no	PD4225a	PD4225b	CGP	Primary	Breast	ER	-	-	-	-
130	455	no	PD4248a	PD4248b	CGP	Primary	Breast	TNBC	-	-	-	-
132	457	no	PD4255a	PD4255b	CGP	Primary	Breast	TNBC	-	-	-	-
133	458	no	PD4261a	PD4261b	CGP	Primary	Breast	ER	-	-	-	-
134	459	no	PD4264a	PD4264b	CGP	Primary	Breast	unknown	-	-	-	-
135	460	no	PD4266a	PD4266b	CGP	Primary	Breast	ER	-	-	-	-
136	461	no	PD4267a	PD4267b	CGP	Primary	Breast	ER	-	-	-	-
137	493	no	PD4315a	PD4315b	CGP	Primary	Breast	ER	-	-	-	-
138	503	no	PD4604a	PD4604b	CGP	Primary	Breast	ER	-	-	-	-
139	504	no	PD4605a	PD4605b	CGP	Primary	Breast	ER	-	-	-	-
140	505	no	PD4606a	PD4606b	CGP	Primary	Breast	ER	-	-	-	-
141	506	no	PD4607a	PD4607b	CGP	Primary	Breast	ER	-	-	-	-
142	507	no	PD4608a	PD4608b	CGP	Primary	Breast	ER	-	-	-	-
143	508	no	PD4613a	PD4613b	CGP	Primary	Breast	ER	-	-	-	-
144	509	no	PD4727a	PD4727b	CGP	Primary	CLL	CLL	-	-	-	-
145	510	no	PD4728a	PD4728b	CGP	Primary	CLL	CLL	-	-	-	-
146	524	no	PD4820a	PD4820b	CGP	Primary	Breast	unknown	-	-	-	-
147	525	no	PD4826a	PD4826b	CGP	Primary	Breast	HER2	-	-	-	-
148	526	no	PD4833a	PD4833b	CGP	Primary	Breast	TNBC	-	-	-	-
149	527	no	PD4836a	PD4836b	CGP	Primary	Breast	TNBC	-	-	-	-
150	528	no	PD4841a	PD4841b	CGP	Primary	Breast	TNBC	-	-	-	-
151	532	no	PD4845a	PD4845b	CGP	Primary	Breast	TNBC	-	-	-	-
152	534	no	PD4847a	PD4847b2	CGP	Primary	Breast	TNBC	-	-	-	-
153	559	no	PD4872a	PD4872b	CGP	Primary	Breast	ER	-	-	-	-
154	560	no	PD4873a	PD4873b	CGP	Primary	Breast	ER	-	-	-	-
155	561	no	PD4874a	PD4874b	CGP	Primary	Breast	TNBC	-	-	-	-
156	562	no	PD4875a	PD4875b	CGP	Primary	Breast	TNBC	-	-	-	-
157	563	no	PD4876a	PD4876b	CGP	Primary	Breast	ER	-	-	-	-
158	626	no	PD4951a	PD4951b	CGP	Primary	Breast	ER	-	-	-	-
159	627	no	PD4952a	PD4952b	CGP	Primary	Breast	ER	-	-	-	-
160	628	no	PD4953a	PD4953b	CGP	Primary	Breast	ER	-	-	-	-
161	629	no	PD4954a	PD4954b	CGP	Primary	Breast	ER	-	-	-	-
162	630	no	PD4955a	PD4955b	CGP	Primary	Breast	TNBC	-	-	-	-
163	631	no	PD4956a	PD4956b	CGP	Primary	Breast	TNBC	-	-	-	-
164	632	no	PD4957a	PD4957b	CGP	Primary	Breast	ER	-	-	-	-
165	633	no	PD4958a	PD4958b	CGP	Primary	Breast	ER	-	-	-	-
166	634	no	PD4959a	PD4959b	CGP	Primary	Breast	ER	-	-	-	-
167	635	no	PD4962a	PD4962b	CGP	Primary	Breast	ER	-	-	-	-
168	636	no	PD4963a	PD4963b	CGP	Primary	Breast	ER	-	-	-	-
169	637	no	PD4965a	PD4965b	CGP	Primary	Breast	ER	-	-	-	-
170	638	no	PD4966a	PD4966b	CGP	Primary	Breast	ER	-	-	-	-
171	639	no	PD4967a	PD4967b	CGP	Primary	Breast	ER	-	-	-	-
172	640	no	PD4968a	PD4968b	CGP	Primary	Breast	ER	-	-	-	-
173	641	no	PD4969a	PD4969b	CGP	Primary	Breast	ER	-	-	-	-
174	642	no	PD4970a	PD4970b	CGP	Primary	Breast	ER	-	-	-	-
175	643	no	PD4971a	PD4971b	CGP	Primary	Breast	ER	-	-	-	-
176	644	no	PD4972a	PD4972b	CGP	Primary	Breast	ER	-	-	-	-
177	645	no	PD4975a	PD4975b	CGP	Primary	Breast	TNBC	-	-	-	-
178	646	no	PD4976a	PD4976b	CGP	Primary	Breast	ER	-	-	-	-
179	647	no	PD4977a	PD4977b	CGP	Primary	Breast	TNBC	-	-	-	-
180	648	no	PD4978a	PD4978b	CGP	Primary	Breast	unknown	-	-	-	-
181	649	no	PD4979a	PD4979b	CGP	Primary	Breast	unknown	-	-	-	-
182	650	no	PD4980a	PD4980b	CGP	Primary	Breast	TNBC	-	-	-	-
183	651	no	PD4981a	PD4981b	CGP	Primary	Breast	ER	-	-	-	-
184	652	no	PD4982a	PD4982b	CGP	Primary	Breast	ER	-	-	-	-
185	653	no	PD4983a	PD4983b	CGP	Primary	Breast	ER	-	-	-	-
186	654	no	PD4985a	PD4985b	CGP	Primary	Breast	ER	-	-	-	-
187	655	no	PD4986a	PD4986b	CGP	Primary	Breast	ER	-	-	-	-
188	749	no	PD5925a	PD5925b	CGP	Primary	Breast	TNBC	-	-	-	-
189	750	no	PD5928a	PD5928b	CGP	Primary	Breast	ER	-	-	-	-
190	751	no	PD5930a	PD5930b	CGP	Primary	Breast	TNBC	-	-	-	-
191	753	no	PD5934a	PD5934b	CGP	Primary	Breast	TNBC	-	-	-	-
192	754	no	PD5935a	PD5935b	CGP	Primary	Breast	TNBC	-	-	-	-
193	755	no	PD5936a	PD5936b	CGP	Primary	Breast	ER	-	-	-	-
194	756	no	PD5937a	PD5937b	CGP	Primary	Breast	ER	-	-	-	-
195	757	no	PD5938a	PD5938b	CGP	Primary	Breast	ER	-	-	-	-
196	758	no	PD5942a	PD5942b	CGP	Primary	Breast	TNBC	-	-	-	-
197	759	no	PD5944a	PD5944b	CGP	Primary	Breast	TNBC	-	-	-	-
198	760	no	PD5945a	PD5945b	CGP	Primary	Breast	TNBC	-	-	-	-
199	761	no	PD5946a	PD5946b	CGP	Primary	Breast	ER	-	-	-	-
200	762	no	PD5947a	PD5947b	CGP	Primary	Breast	ER	-	-	-	-
201	763	no	PD5948a	PD5948b	CGP	Primary	Breast	TNBC	-	-	-	-
202	764	no	PD5950a	PD5950b	CGP	Primary	Breast	TNBC	-	-	-	-
203	765	no	PD5951a	PD5951b	CGP	Primary	Breast	ER	-	-	-	-
204	766	no	PD5953a	PD5953b	CGP	Primary	Breast	ER	-	-	-	-
205	767	no	PD5954a	PD5954b	CGP	Primary	Breast	ER	-	-	-	-
206	768	no	PD5956a	PD5956b	CGP	Primary	Breast	ER	-	-	-	-
207	769	no	PD5959a	PD5959b	CGP	Primary	Breast	ER	-	-	-	-
208	770	no	PD5960a	PD5960b	CGP	Primary	Breast	ER	-	-	-	-
209	771	no	PD5961a	PD5961b	CGP	Primary	Breast	ER	-	-	-	-
210	772	no	PD5964a	PD5964b	CGP	Primary	Breast	ER	-	-	-	-
211	774	no	PD6018a	PD6018b	CGP	Primary	Breast	TNBC	-	-	-	-
212	794	no	PD6041a	PD6041b	CGP	Primary	Breast	ER	-	-	-	-
213	795	no	PD6042a	PD6042b	CGP	Primary	Breast	ER	-	-	-	-
214	796	no	PD6043a	PD6043b	CGP	Primary	Breast	ER	-	-	-	-
215	797	no	PD6044a	PD6044b	CGP	Primary	Breast	ER	-	-	-	-
216	798	no	PD6045a	PD6045b	CGP	Primary	Breast	ER	-	-	-	-
217	799	no	PD6046a	PD6046b	CGP	Primary	Breast	TNBC	-	-	-	-
219	802	no	PD6049a	PD6049b	CGP	Primary	Breast	ER	-	-	-	-
220	816	no	PD6130a2	PD6130b	CGP	Primary	MDS	MDS	-	-	-	-
221	825	no	PD6204a_BGI	PD6204b	CGP	Primary	Prostate	Prostate	-	-	-	-
222	826	no	PD6204a_Illumina	PD6204b	CGP	Primary	Prostate	Prostate	-	-	-	-
223	827	no	PD6205a	PD6205b	CGP	Primary	AML	AML	-	-	-	-
224	854	no	PD6406a	PD6406b	CGP	Primary	Breast	TNBC	-	-	-	-
225	856	no	PD6409a	PD6409b	CGP	Primary	Breast	TNBC	-	-	-	-
226	857	no	PD6410a	PD6410b	CGP	Primary	Breast	TNBC	-	-	-	-
227	858	no	PD6411a	PD6411b	CGP	Primary	Breast	TNBC	-	-	-	-
228	859	no	PD6412a	PD6412b	CGP	Primary	Breast	TNBC	-	-	-	-
229	860	no	PD6413a	PD6413b	CGP	Primary	Breast	TNBC	-	-	-	-
230	861	no	PD6414a	PD6414b	CGP	Primary	Breast	TNBC	-	-	-	-
231	862	no	PD6415a	PD6415b	CGP	Primary	Breast	TNBC	-	-	-	-
232	863	no	PD6416a	PD6416b	CGP	Primary	Breast	TNBC	-	-	-	-
233	865	no	PD6418a	PD6418b	CGP	Primary	Breast	ER	-	-	-	-
234	866	no	PD6422a	PD6422b	CGP	Primary	Breast	ER	-	-	-	-
235	902	no	PD6684a	PD6684b	CGP	Primary	Breast	ER	-	-	-	-
236	903	no	PD6719a	PD6719b	CGP	Primary	Breast	ER	-	-	-	-
237	904	no	PD6720a	PD6720b	CGP	Primary	Breast	ER	-	-	-	-
238	906	no	PD6722a	PD6722b	CGP	Primary	Breast	TNBC	-	-	-	-
239	934	no	PD6804a2	PD6804b	CGP	Primary	MDS	MDS	-	-	-	-
240	939	no	PD7066a	PD7066b	CGP	Primary	Breast	TNBC	-	-	-	-
241	940	no	PD7067a	PD7067b	CGP	Primary	Breast	TNBC	-	-	-	-
242	941	no	PD7068a	PD7068b	CGP	Primary	Breast	TNBC	-	-	-	-
243	942	no	PD7069a	PD7069b	CGP	Primary	Breast	TNBC	-	-	-	-
244	1008	no	PD7188a	PD7188b	CGP	Primary	Osteosarcoma	Osteosarcoma	-	-	-	-
245	1009	no	PD7189a	PD7189b	CGP	Primary	Osteosarcoma	Osteosarcoma	-	-	-	-
246	1010	no	PD7190a	PD7190b	CGP	Primary	Osteosarcoma	Osteosarcoma	-	-	-	-
247	1011	no	PD7191a	PD7191b	CGP	Primary	Osteosarcoma	Osteosarcoma	-	-	-	-
248	1012	no	PD7192a	PD7192b	CGP	Primary	Osteosarcoma	Osteosarcoma	-	-	-	-
249	1013	no	PD7193a	PD7193b	CGP	Primary	Osteosarcoma	Osteosarcoma	-	-	-	-
250	1015	no	PD7195a	PD7195b	CGP	Primary	Osteosarcoma	Osteosarcoma	-	-	-	-
251	1016	no	PD7196a	PD7196b	CGP	Primary	Osteosarcoma	Osteosarcoma	-	-	-	-
252	1017	no	PD7197a	PD7197b	CGP	Primary	Osteosarcoma	Osteosarcoma	-	-	-	-
253	1018	no	PD7199a	PD7199b	CGP	Primary	Breast	ER	-	-	-	-
254	1019	no	PD7201a	PD7201b	CGP	Primary	Breast	ER	-	-	-	-
255	1023	no	PD7206a	PD7206b	CGP	Primary	Breast	ER	-	-	-	-
256	1024	no	PD7207a	PD7207b	CGP	Primary	Breast	ER	-	-	-	-
257	1025	no	PD7208a	PD7208b	CGP	Primary	Breast	ER	-	-	-	-
258	1026	no	PD7209a	PD7209b	CGP	Primary	Breast	ER	-	-	-	-
259	1027	no	PD7210a	PD7210b	CGP	Primary	Breast	ER	-	-	-	-
260	1028	no	PD7211a	PD7211b	CGP	Primary	Breast	TNBC	-	-	-	-
261	1029	no	PD7212a	PD7212b	CGP	Primary	Breast	ER	-	-	-	-
262	1030	no	PD7214a	PD7214b	CGP	Primary	Breast	ER	-	-	-	-
263	1031	no	PD7215a	PD7215b	CGP	Primary	Breast	ER	-	-	-	-
264	1032	no	PD7216a	PD7216b	CGP	Primary	Breast	ER	-	-	-	-
265	1033	no	PD7217a	PD7217b	CGP	Primary	Breast	TNBC	-	-	-	-
266	1034	no	PD7218a	PD7218b	CGP	Primary	Breast	ER	-	-	-	-
267	1035	no	PD7219a	PD7219b	CGP	Primary	Breast	ER	-	-	-	-
268	1036	no	PD7221a	PD7221b	CGP	Primary	Breast	ER	-	-	-	-
269	1044	no	PD7238a	PD7238b	CGP	Primary	Breast	ER	-	-	-	-
270	1045	no	PD7243a	PD7243b	CGP	Primary	Breast	ER	-	-	-	-
271	1096	no	PD7316a	PD7316b	CGP	Primary	Breast	TNBC	-	-	-	-
272	1097	no	PD7321a	PD7321b	CGP	Primary	Breast	TNBC	-	-	-	-
273	1098	no	PD7341a	PD7341b	CGP	Primary	Breast	TNBC	-	-	-	-
274	1099	no	PD7344a	PD7344b	CGP	Primary	Breast	TNBC	-	-	-	-
275	1105	no	PD7355a	PD7355b2	CGP	Primary	Lung	Lung	-	-	-	-
276	1116	no	PD7401a	PD7401b	CGP	Primary	Osteosarcoma	Osteosarcoma	-	-	-	-
278	1118	no	PD7405a2	PD7405b	CGP	Primary	Breast	unknown	-	-	-	-
279	1119	no	PD7407a	PD7407b	CGP	Primary	Breast	unknown	-	-	-	-
280	1120	no	PD7408a	PD7408b	CGP	Primary	Breast	unknown	-	-	-	-
281	1121	no	PD7409a	PD7409b	CGP	Primary	Breast	HER2	-	-	-	-
282	1122	no	PD7410a	PD7410b	CGP	Primary	Breast	unknown	-	-	-	-
283	1126	no	PD7414a	PD7414b	CGP	Primary	Breast	unknown	-	-	-	-
284	1128	no	PD7416a	PD7416b	CGP	Primary	Breast	unknown	-	-	-	-
285	1129	no	PD7418a	PD7418b	CGP	Primary	Breast	unknown	-	-	-	-
286	1132	no	PD7422a	PD7422b	CGP	Primary	Breast	unknown	-	-	-	-
287	1136	no	PD7426a	PD7426b	CGP	Primary	Breast	TNBC	-	-	-	-
288	1138	no	PD7428a	PD7428b	CGP	Primary	Breast	TNBC	-	-	-	-
289	1141	no	PD7431a	PD7431b	CGP	Primary	Breast	HER2	-	-	-	-
290	1143	no	PD7433a	PD7433b	CGP	Primary	Breast	ER	-	-	-	-
291	1155	no	PD7445a	PD7445b	CGP	Primary	Prostate	Prostate	-	-	-	-
292	1156	no	PD7446a	PD7446b	CGP	Primary	Prostate	Prostate	-	-	-	-
293	1157	no	PD7447a	PD7447b	CGP	Primary	Prostate	Prostate	-	-	-	-
294	1158	no	PD7507a	PD7507b	CGP	Primary	Osteosarcoma	Osteosarcoma	-	-	-	-
295	1159	no	PD7508a	PD7508b	CGP	Primary	Osteosarcoma	Osteosarcoma	-	-	-	-
296	1160	no	PD7509a	PD7509b	CGP	Primary	Osteosarcoma	Osteosarcoma	-	-	-	-
297	1161	no	PD7510a	PD7510b	CGP	Primary	Osteosarcoma	Osteosarcoma	-	-	-	-
298	1162	no	PD7511a	PD7511b	CGP	Primary	Osteosarcoma	Osteosarcoma	-	-	-	-
299	1163	no	PD7512a	PD7512b	CGP	Primary	Osteosarcoma	Osteosarcoma	-	-	-	-
300	1164	no	PD7513a	PD7513b	CGP	Primary	Osteosarcoma	Osteosarcoma	-	-	-	-
301	1165	no	PD7514a	PD7514b	CGP	Primary	Osteosarcoma	Osteosarcoma	-	-	-	-
302	1166	no	PD7515a	PD7515b	CGP	Primary	Osteosarcoma	Osteosarcoma	-	-	-	-
303	1167	no	PD7516a	PD7516b	CGP	Primary	Osteosarcoma	Osteosarcoma	-	-	-	-
304	1168	no	PD7517a	PD7517b	CGP	Primary	Osteosarcoma	Osteosarcoma	-	-	-	-
305	1169	no	PD7518a	PD7518b	CGP	Primary	Osteosarcoma	Osteosarcoma	-	-	-	-
306	1170	no	PD7519a	PD7519b	CGP	Primary	Osteosarcoma	Osteosarcoma	-	-	-	-
307	1171	no	PD7520a	PD7520b	CGP	Primary	Osteosarcoma	Osteosarcoma	-	-	-	-
308	1172	no	PD7521a	PD7521b	CGP	Primary	Osteosarcoma	Osteosarcoma	-	-	-	-
309	1173	no	PD7522a	PD7522b	CGP	Primary	Osteosarcoma	Osteosarcoma	-	-	-	-
310	1174	no	PD7523a	PD7523b	CGP	Primary	Osteosarcoma	Osteosarcoma	-	-	-	-
311	1175	no	PD7524a	PD7524b	CGP	Primary	Osteosarcoma	Osteosarcoma	-	-	-	-
312	1176	no	PD7525a	PD7525b	CGP	Primary	Osteosarcoma	Osteosarcoma	-	-	-	-
313	1178	no	PD7527a	PD7527b	CGP	Primary	Osteosarcoma	Osteosarcoma	-	-	-	-
314	1179	no	PD7528a	PD7528b	CGP	Primary	Osteosarcoma	Osteosarcoma	-	-	-	-
315	1180	no	PD7529a	PD7529b	CGP	Primary	Osteosarcoma	Osteosarcoma	-	-	-	-
316	1181	no	PD7530a	PD7530b	CGP	Primary	Osteosarcoma	Osteosarcoma	-	-	-	-
317	1201	no	PD8604a	PD8604b2	CGP	Primary	Ependymoma	Ependymoma	-	-	-	-
318	1203	no	PD8607a	PD8607b	CGP	Primary	Breast	ER	-	-	-	-
319	1204	no	PD8608a	PD8608b	CGP	Primary	Breast	ER	-	-	-	-
320	1205	no	PD8609a	PD8609b	CGP	Primary	Breast	ER	-	-	-	-
321	1206	no	PD8610a	PD8610b	CGP	Primary	Breast	ER	-	-	-	-
322	1207	no	PD8611a	PD8611b	CGP	Primary	Breast	TNBC	-	-	-	-
323	1208	no	PD8618a	PD8618b	CGP	Primary	Breast	ER	-	-	-	-
324	1209	no	PD8621a	PD8621b	CGP	Primary	Breast	TNBC	-	-	-	-
325	1210	no	PD8622a	PD8622b	CGP	Primary	Breast	ER	-	-	-	-
326	1211	no	PD8623a	PD8623b	CGP	Primary	Breast	ER	-	-	-	-
327	1237	no	PD8830a	PD8830b	CGP	Primary	Breast	TNBC	-	-	-	-
328	1238	no	PD8832a	PD8832b	CGP	Primary	Breast	TNBC	-	-	-	-
329	1249	no	PD8964a	PD8964b	CGP	Primary	Breast	TNBC	-	-	-	-
330	1250	no	PD8966a	PD8966b	CGP	Primary	Breast	TNBC	-	-	-	-
331	1251	no	PD8969a	PD8969b	CGP	Primary	Breast	TNBC	-	-	-	-
332	1252	no	PD8973a	PD8973b	CGP	Primary	Breast	ER	-	-	-	-
333	1253	no	PD8978a	PD8978b	CGP	Primary	Breast	ER	-	-	-	-
334	1254	no	PD8979a	PD8979b	CGP	Primary	Breast	ER	-	-	-	-
335	1255	no	PD8980a	PD8980b	CGP	Primary	Breast	ER	-	-	-	-
336	1256	no	PD8981a	PD8981b	CGP	Primary	Breast	ER	-	-	-	-
337	1263	no	PD9000a	PD9000b	CGP	Primary	Breast	ER	-	-	-	-
338	1264	no	PD9001a	PD9001b	CGP	Primary	Breast	ER	-	-	-	-
339	1265	no	PD9002a	PD9002b	CGP	Primary	Breast	ER	-	-	-	-
340	1281	no	PD9056a	PD9056b	CGP	Primary	Osteosarcoma	Osteosarcoma	-	-	-	-
341	1283	no	PD9168a	PD9168b	CGP	Primary	Prostate	Prostate	-	-	-	-
342	1284	no	PD9169a	PD9169b	CGP	Primary	Prostate	Prostate	-	-	-	-
343	1285	no	PD9170a	PD9170b	CGP	Primary	Prostate	Prostate	-	-	-	-
344	1286	no	PD9171a	PD9171b	CGP	Primary	Prostate	Prostate	-	-	-	-
345	1287	no	PD9172a	PD9172b	CGP	Primary	MDS	MDS	-	-	-	-
346	1288	no	PD9193a	PD9193b	CGP	Primary	Breast	ER	-	-	-	-
347	1289	no	PD9194a	PD9194b	CGP	Primary	Breast	unknown	-	-	-	-
348	1290	no	PD9195a	PD9195b	CGP	Primary	Breast	unknown	-	-	-	-
349	1304	no	PD9476a	PD9476b	CGP	Primary	MPD	MPD	-	-	-	-
350	1305	no	PD9478a	PD9478b	CGP	Primary	MPD	MPD	-	-	-	-
351	1306	no	PD9479a	PD9479b	CGP	Primary	MPD	MPD	-	-	-	-
352	1307	no	PD9539a	PD9539b	CGP	Primary	Breast	ER	-	-	-	-
353	1309	no	PD9544a	PD9544b	CGP	Primary	Breast	ER	-	-	-	-
354	1310	no	PD9567a	PD9567b	CGP	Primary	Breast	ER	-	-	-	-
355	1311	no	PD9568a	PD9568b	CGP	Primary	Breast	TNBC	-	-	-	-
356	1312	no	PD9569a	PD9569b	CGP	Primary	Breast	ER	-	-	-	-
357	1313	no	PD9570a	PD9570b	CGP	Primary	Breast	ER	-	-	-	-
358	1314	no	PD9571a	PD9571b	CGP	Primary	Breast	TNBC	-	-	-	-
359	1315	no	PD9572a	PD9572b	CGP	Primary	Breast	ER	-	-	-	-
360	1316	no	PD9573a	PD9573b	CGP	Primary	Breast	ER	-	-	-	-
361	1317	no	PD9574a	PD9574b	CGP	Primary	Breast	ER	-	-	-	-
362	1318	no	PD9575a	PD9575b	CGP	Primary	Breast	ER	-	-	-	-
363	1319	no	PD9577a	PD9577b	CGP	Primary	Breast	ER	-	-	-	-
364	1320	no	PD9582a	PD9582b	CGP	Primary	Breast	ER	-	-	-	-
365	1321	no	PD9589a	PD9589b	CGP	Primary	Breast	ER	-	-	-	-
366	1322	no	PD9592a	PD9592b	CGP	Primary	Breast	TNBC	-	-	-	-
367	1323	no	PD9593a	PD9593b	CGP	Primary	Breast	ER	-	-	-	-
368	1324	no	PD9595a	PD9595b	CGP	Primary	Breast	TNBC	-	-	-	-
369	1326	no	PD9597a	PD9597b	CGP	Primary	Breast	ER	-	-	-	-
370	1327	no	PD9599a	PD9599b	CGP	Primary	Breast	ER	-	-	-	-
371	1328	no	PD9604a	PD9604b	CGP	Primary	Breast	TNBC	-	-	-	-
372	1329	no	PD9605a	PD9605b	CGP	Primary	Breast	ER	-	-	-	-
373	1360	no	PD9696a	PD9696b	CGP	Primary	Breast	TNBC	-	-	-	-
374	1361	no	PD9702a	PD9702b	CGP	Primary	Breast	TNBC	-	-	-	-
375	1362	no	PD9746a	PD9746b	CGP	Primary	Prostate	Prostate	-	-	-	-
376	1363	no	PD9749a	PD9749b	CGP	Primary	Prostate	Prostate	-	-	-	-
377	1364	no	PD9751a	PD9751b	CGP	Primary	Prostate	Prostate	-	-	-	-
378	1365	no	PD9752a	PD9752b	CGP	Primary	Breast	ER	-	-	-	-
379	1366	no	PD9754a	PD9754b	CGP	Primary	Breast	ER	-	-	-	-
380	1367	no	PD9755a	PD9755b	CGP	Primary	Breast	ER	-	-	-	-
381	1368	no	PD9756a	PD9756b	CGP	Primary	Breast	ER	-	-	-	-
382	1369	no	PD9757a	PD9757b	CGP	Primary	Breast	ER	-	-	-	-
383	1370	no	PD9758a	PD9758b	CGP	Primary	Breast	ER	-	-	-	-
384	1371	no	PD9759a	PD9759b	CGP	Primary	Breast	ER	-	-	-	-
385	1372	no	PD9760a	PD9760b	CGP	Primary	Breast	ER	-	-	-	-
386	1373	no	PD9761a	PD9761b	CGP	Primary	Breast	ER	-	-	-	-
387	1376	no	PD9770c	PD9770b	CGP	Primary	Breast	unknown	-	-	-	-
388	1377	no	PD9771a	PD9771b	CGP	Primary	Breast	TNBC	-	-	-	-
389	1381	no	PD9775a	PD9775b	CGP	Primary	Breast	TNBC	-	-	-	-
390	1382	no	PD9776a	PD9776b	CGP	Primary	Breast	TNBC	-	-	-	-
391	1383	no	PD9777a	PD9777b	CGP	Primary	Breast	TNBC	-	-	-	-
392	1385	no	PD9843a	PD9843b	CGP	Primary	Breast	ER	-	-	-	-
393	1386	no	PD9845a	PD9845b	CGP	Primary	Breast	ER	-	-	-	-
394	1387	no	PD9847a	PD9847b	CGP	Primary	Breast	ER	-	-	-	-
395	1388	no	PD9849a	PD9849b	CGP	Primary	Breast	unknown	-	-	-	-
396	5499	no	TCGA-CN-4741-01A-01D-2268-08	CN-4741-10A	BI	Primary	Head&Neck	Head&Neck	-	-	-	-
397	5500	no	TCGA-BA-4077-01B-01D-2268-08	BA-4077-10A	BI	Primary	Head&Neck	Head&Neck	-	-	-	-
398	5501	no	TCGA-BB-4225-01A-01D-2268-08	BB-4225-10A	BI	Primary	Head&Neck	Head&Neck	-	-	-	-
399	5502	no	TCGA-BA-5153-01A-01D-2268-08	BA-5153-10A	BI	Primary	Head&Neck	Head&Neck	-	-	-	-
400	5503	no	TCGA-05-4395-01A-01D-2364-08	05-4395-10A	BI	Primary	Lung	Lung	-	-	-	-
401	5504	no	TCGA-05-4396-01A-21D-1855-08	05-4396-10A	BI	Primary	Lung	Lung	-	-	-	-
402	5505	no	TCGA-05-4397-01A-01D-1931-08	05-4397-10A	BI	Primary	Lung	Lung	-	-	-	-
403	5506	no	TCGA-05-4398-01A-01D-1931-08	05-4398-10A	BI	Primary	Lung	Lung	-	-	-	-
404	5507	no	TCGA-05-4389-01A-01D-1931-08	05-4389-10A	BI	Primary	Lung	Lung	-	-	-	-
405	5509	no	TCGA-AG-3574-01A-01D-1989-10	AG-3574-10A	BCM	Primary	Colorectal	Colorectal	-	-	-	-
406	7001	no	PD12442a	PD12442b	CGP	Primary	osteosarcoma	osteosarcoma	-	-	-	-
407	7002	no	PD13462a	PD13462b	CGP	Primary	osteosarcoma	osteosarcoma	-	-	-	-
408	7003	no	PD13464a	PD13464b	CGP	Primary	osteosarcoma	osteosarcoma	-	-	-	-
409	7004	no	PD13476a	PD13476b	CGP	Primary	osteosarcoma	osteosarcoma	-	-	-	-
410	7005	no	PD13477a	PD13477b	CGP	Primary	osteosarcoma	osteosarcoma	-	-	-	-
411	7006	no	PD13478a	PD13478b	CGP	Primary	osteosarcoma	osteosarcoma	-	-	-	-
412	7007	no	PD13484a	PD13484b	CGP	Primary	osteosarcoma	osteosarcoma	-	-	-	-
413	7008	no	PD13485a	PD13485b	CGP	Primary	osteosarcoma	osteosarcoma	-	-	-	-
414	7009	no	PD13486a	PD13486b	CGP	Primary	osteosarcoma	osteosarcoma	-	-	-	-
415	7010	no	PD13487a	PD13487b	CGP	Primary	osteosarcoma	osteosarcoma	-	-	-	-
416	7011	no	PD13488a	PD13488b	CGP	Primary	osteosarcoma	osteosarcoma	-	-	-	-
417	7012	no	PD13489a	PD13489b	CGP	Primary	osteosarcoma	osteosarcoma	-	-	-	-
418	7013	no	PD13490a	PD13490b	CGP	Primary	osteosarcoma	osteosarcoma	-	-	-	-
419	7014	no	PD13491a	PD13491b	CGP	Primary	osteosarcoma	osteosarcoma	-	-	-	-
420	7015	no	PD13492a	PD13492b	CGP	Primary	osteosarcoma	osteosarcoma	-	-	-	-
421	7016	no	PD13493a	PD13493b	CGP	Primary	osteosarcoma	osteosarcoma	-	-	-	-
422	7017	no	PD13494a	PD13494b	CGP	Primary	osteosarcoma	osteosarcoma	-	-	-	-
423	7018	no	PD13495a	PD13495b	CGP	Primary	osteosarcoma	osteosarcoma	-	-	-	-
424	7019	no	PD13496a	PD13496b	CGP	Primary	osteosarcoma	osteosarcoma	-	-	-	-
425	7020	no	PD7194a	PD7194b	CGP	Primary	osteosarcoma	osteosarcoma	-	-	-	-
426	7021	no	PD9402a	PD9402b	CGP	Primary	osteosarcoma	osteosarcoma	-	-	-	-
427	7022	no	PD9408a	PD9408b	CGP	Primary	osteosarcoma	osteosarcoma	-	-	-	-
428	7023	no	PD9962a	PD9962b	CGP	Primary	osteosarcoma	osteosarcoma	-	-	-	-
429	7024	no	PD9969a	PD9969b	CGP	Primary	osteosarcoma	osteosarcoma	-	-	-	-
430	7025	no	PD9972a	PD9972b	CGP	Primary	osteosarcoma	osteosarcoma	-	-	-	-
431	7026	no	PD9979a	PD9979b	CGP	Primary	osteosarcoma	osteosarcoma	-	-	-	-
432	7027	no	PD11411a	PD11411b	CGP	Primary	chordoma	chordoma	-	-	-	-
433	7028	no	PD11414a	PD11414b	CGP	Primary	chordoma	chordoma	-	-	-	-
434	7029	no	PD11420a	PD11420b	CGP	Primary	chordoma	chordoma	-	-	-	-
435	7030	no	PD11421a	PD11421b	CGP	Primary	chordoma	chordoma	-	-	-	-
436	7031	no	PD11424a	PD11424b	CGP	Primary	chordoma	chordoma	-	-	-	-
437	7032	no	PD13455a	PD13455b	CGP	Primary	chordoma	chordoma	-	-	-	-
438	7033	no	PD13479a	PD13479b	CGP	Primary	chordoma	chordoma	-	-	-	-
439	7034	no	PD13483a	PD13483b	CGP	Primary	chordoma	chordoma	-	-	-	-
440	7035	no	PD13349a	PD13349b	CGP	Primary	colorectal_mets	Colorectal	-	-	-	-
441	7040	no	PD11748a	PD11748b	CGP	Primary	Breast	TNBC	-	-	-	-
442	7041	no	PD11751a	PD11751b	CGP	Primary	Breast	TNBC	-	-	-	-
443	7042	no	PD11752a	PD11752b	CGP	Primary	Breast	TNBC	-	-	-	-
444	7043	no	PD11762a	PD11762b	CGP	Primary	Breast	TNBC	-	-	-	-
446	7045	no	PD13297a	PD13297b	CGP	Primary	Breast	TNBC	-	-	-	-
447	7046	no	PD13298a	PD13298b	CGP	Primary	Breast	TNBC	-	-	-	-
448	7047	no	PD13299a	PD13299b	CGP	Primary	Breast	TNBC	-	-	-	-
449	7048	no	PD13418a	PD13418b	CGP	Primary	Breast	TNBC	-	-	-	-
450	7049	no	PD13428a	PD13428b	CGP	Primary	Breast	TNBC	-	-	-	-
451	7050	no	PD13622a	PD13622b	CGP	Primary	Breast	TNBC	-	-	-	-
452	7051	no	PD13627a	PD13627b	CGP	Primary	Breast	TNBC	-	-	-	-
453	7052	no	PD13749a	PD13749b	CGP	Primary	Breast	TNBC	-	-	-	-
454	7053	no	PD4243a	PD4243b	CGP	Primary	Breast	TNBC	-	-	-	-
455	7054	no	PD5932a	PD5932b	CGP	Primary	Breast	TNBC	-	-	-	-
456	7055	no	PD6727b	PD6727a	CGP	Primary	Breast	TNBC	-	-	-	-
458	7057	no	PD6732b	PD6732a	CGP	Primary	Breast	TNBC	-	-	-	-
460	7059	no	PD7248a	PD7248b	CGP	Primary	Breast	TNBC	-	-	-	-
461	7060	no	PD7250a	PD7250b	CGP	Primary	Breast	TNBC	-	-	-	-
462	7061	no	PD8828a	PD8828b	CGP	Primary	Breast	TNBC	-	-	-	-
463	7062	no	PD8965a	PD8965b	CGP	Primary	Breast	TNBC	-	-	-	-
464	7063	no	PD8982a	PD8982b	CGP	Primary	Breast	TNBC	-	-	-	-
465	7064	no	PD8984a	PD8984b	CGP	Primary	Breast	TNBC	-	-	-	-
466	7065	no	PD11352a	PD11352b	CGP	Primary	Breast	ER	-	-	-	-
467	7066	no	PD11355a	PD11355b	CGP	Primary	Breast	ER	-	-	-	-
468	7067	no	PD11357a	PD11357b	CGP	Primary	Breast	ER	-	-	-	-
469	7068	no	PD11359a	PD11359b	CGP	Primary	Breast	ER	-	-	-	-
470	7069	no	PD11360a	PD11360b	CGP	Primary	Breast	ER	-	-	-	-
471	7070	no	PD11361a	PD11361b	CGP	Primary	Breast	ER	-	-	-	-
472	7071	no	PD11364a	PD11364b	CGP	Primary	Breast	ER	-	-	-	-
473	7072	no	PD11365a	PD11365b	CGP	Primary	Breast	ER	-	-	-	-
474	7073	no	PD11366a	PD11366b	CGP	Primary	Breast	ER	-	-	-	-
475	7074	no	PD11368a	PD11368b	CGP	Primary	Breast	ER	-	-	-	-
476	7075	no	PD11395a	PD11395b	CGP	Primary	Breast	ER	-	-	-	-
478	7077	no	PD11402a	PD11402b	CGP	Primary	Breast	ER	-	-	-	-
479	7078	no	PD11743a	PD11743b	CGP	Primary	Breast	ER	-	-	-	-
480	7079	no	PD11750a	PD11750b	CGP	Primary	Breast	ER	-	-	-	-
481	7080	no	PD11753a	PD11753b	CGP	Primary	Breast	ER	-	-	-	-
482	7081	no	PD11754a	PD11754b	CGP	Primary	Breast	ER	-	-	-	-
483	7082	no	PD11756a	PD11756b	CGP	Primary	Breast	ER	-	-	-	-
484	7083	no	PD11760a	PD11760b	CGP	Primary	Breast	ER	-	-	-	-
485	7084	no	PD11767a	PD11767b	CGP	Primary	Breast	ER	-	-	-	-
487	7086	no	PD11816a	PD11816b	CGP	Primary	Breast	ER	-	-	-	-
488	7087	no	PD13302a	PD13302b	CGP	Primary	Breast	ER	-	-	-	-
489	7088	no	PD13304a	PD13304b	CGP	Primary	Breast	ER	-	-	-	-
490	7089	no	PD13306a	PD13306b	CGP	Primary	Breast	ER	-	-	-	-
491	7090	no	PD13307a	PD13307b	CGP	Primary	Breast	ER	-	-	-	-
492	7091	no	PD13310a	PD13310b	CGP	Primary	Breast	ER	-	-	-	-
493	7092	no	PD13312a	PD13312b	CGP	Primary	Breast	ER	-	-	-	-
494	7093	no	PD13416a	PD13416b	CGP	Primary	Breast	ER	-	-	-	-
495	7094	no	PD13419a	PD13419b	CGP	Primary	Breast	ER	-	-	-	-
496	7095	no	PD13420a	PD13420b	CGP	Primary	Breast	ER	-	-	-	-
497	7096	no	PD13421a	PD13421b	CGP	Primary	Breast	ER	-	-	-	-
498	7097	no	PD13424a	PD13424b	CGP	Primary	Breast	ER	-	-	-	-
499	7098	no	PD13425a	PD13425b	CGP	Primary	Breast	ER	-	-	-	-
500	7099	no	PD13426a	PD13426b	CGP	Primary	Breast	ER	-	-	-	-
501	7100	no	PD13427a	PD13427b	CGP	Primary	Breast	ER	-	-	-	-
502	7101	no	PD13618a	PD13618b	CGP	Primary	Breast	ER	-	-	-	-
503	7102	no	PD13619a	PD13619b	CGP	Primary	Breast	ER	-	-	-	-
504	7103	no	PD13620a	PD13620b	CGP	Primary	Breast	ER	-	-	-	-
505	7104	no	PD13623a	PD13623b	CGP	Primary	Breast	ER	-	-	-	-
506	7105	no	PD13625a	PD13625b	CGP	Primary	Breast	ER	-	-	-	-
507	7106	no	PD13626a	PD13626b	CGP	Primary	Breast	ER	-	-	-	-
508	7107	no	PD13630a	PD13630b	CGP	Primary	Breast	ER	-	-	-	-
509	7108	no	PD13631a	PD13631b	CGP	Primary	Breast	ER	-	-	-	-
510	7109	no	PD13752a	PD13752b	CGP	Primary	Breast	ER	-	-	-	-
511	7110	no	PD13755a	PD13755b	CGP	Primary	Breast	ER	-	-	-	-
512	7111	no	PD13758a	PD13758b	CGP	Primary	Breast	ER	-	-	-	-
513	7112	no	PD13760a	PD13760b	CGP	Primary	Breast	ER	-	-	-	-
514	7113	no	PD13761a	PD13761b	CGP	Primary	Breast	ER	-	-	-	-
515	7114	no	PD13762a	PD13762b	CGP	Primary	Breast	ER	-	-	-	-
516	7115	no	PD13763a	PD13763b	CGP	Primary	Breast	ER	-	-	-	-
517	7116	no	PD13764a	PD13764b	CGP	Primary	Breast	ER	-	-	-	-
518	7117	no	PD13766a	PD13766b	CGP	Primary	Breast	ER	-	-	-	-
519	7118	no	PD13770a	PD13770b	CGP	Primary	Breast	ER	-	-	-	-
520	7119	no	PD13771a	PD13771b	CGP	Primary	Breast	ER	-	-	-	-
521	7120	no	PD14437a	PD14437b	CGP	Primary	Breast	ER	-	-	-	-
522	7121	no	PD14439a	PD14439b	CGP	Primary	Breast	ER	-	-	-	-
523	7122	no	PD14441a	PD14441b	CGP	Primary	Breast	ER	-	-	-	-
524	7123	no	PD14442a	PD14442b	CGP	Primary	Breast	ER	-	-	-	-
525	7124	no	PD14453a	PD14453b	CGP	Primary	Breast	ER	-	-	-	-
526	7125	no	PD14454a	PD14454b	CGP	Primary	Breast	ER	-	-	-	-
527	7126	no	PD14455a	PD14455b	CGP	Primary	Breast	ER	-	-	-	-
528	7127	no	PD14456a	PD14456b	CGP	Primary	Breast	ER	-	-	-	-
529	7128	no	PD14457a	PD14457b	CGP	Primary	Breast	ER	-	-	-	-
530	7129	no	PD14462a	PD14462b	CGP	Primary	Breast	ER	-	-	-	-
531	7130	no	PD17973a	PD17973b	CGP	Primary	Breast	ER	-	-	-	-
532	7131	no	PD17991a	PD17991b	CGP	Primary	Breast	ER	-	-	-	-
533	7132	no	PD17994a	PD17994b	CGP	Primary	Breast	ER	-	-	-	-
534	7133	no	PD18100a	PD18100b	CGP	Primary	Breast	ER	-	-	-	-
535	7134	no	PD18101a	PD18101b	CGP	Primary	Breast	ER	-	-	-	-
536	7135	no	PD18748a	PD18748b	CGP	Primary	Breast	ER	-	-	-	-
537	7136	no	PD18751a	PD18751b	CGP	Primary	Breast	ER	-	-	-	-
538	7137	no	PD18754a	PD18754b	CGP	Primary	Breast	ER	-	-	-	-
539	7138	no	PD6417a	PD6417b	CGP	Primary	Breast	ER	-	-	-	-
540	7139	no	PD6466b	PD6466a	CGP	Primary	Breast	ER	-	-	-	-
541	7140	no	PD6721a	PD6721b	CGP	Primary	Breast	ER	-	-	-	-
542	7141	no	PD8612a	PD8612b	CGP	Primary	Breast	ER	-	-	-	-
543	7142	no	PD8614a	PD8614b	CGP	Primary	Breast	ER	-	-	-	-
544	7143	no	PD8615a	PD8615b	CGP	Primary	Breast	ER	-	-	-	-
545	7144	no	PD8616a	PD8616b	CGP	Primary	Breast	ER	-	-	-	-
546	7145	no	PD8617a	PD8617b	CGP	Primary	Breast	ER	-	-	-	-
547	7146	no	PD8619a	PD8619b	CGP	Primary	Breast	ER	-	-	-	-
548	7147	no	PD8620a	PD8620b	CGP	Primary	Breast	ER	-	-	-	-
549	7148	no	PD8977a	PD8977b	CGP	Primary	Breast	ER	-	-	-	-
550	7149	no	PD9065a	PD9065b	CGP	Primary	Breast	ER	-	-	-	-
551	7150	no	PD9464a	PD9464b	CGP	Primary	Breast	ER	-	-	-	-
552	7151	no	PD9467a	PD9467b	CGP	Primary	Breast	ER	-	-	-	-
553	7152	no	PD9581a	PD9581b	CGP	Primary	Breast	ER	-	-	-	-
554	7153	no	PD9586a	PD9586b	CGP	Primary	Breast	ER	-	-	-	-
555	7154	no	PD9606a	PD9606b	CGP	Primary	Breast	ER	-	-	-	-
556	7155	no	PD9608a	PD9608b	CGP	Primary	Breast	ER	-	-	-	-
557	7156	no	PD9694a	PD9694b	CGP	Primary	Breast	ER	-	-	-	-
558	7157	no	PD9842a	PD9842b	CGP	Primary	Breast	ER	-	-	-	-
559	7158	no	PD9844a	PD9844b	CGP	Primary	Breast	ER	-	-	-	-
560	8001	no	BB30-HNC	BB30-PBL	CGP	Cell-line	Head&Neck	Squamous_cell_carcinoma	-	-	-	-
561	8002	no	BB49-HNC	BB49-EBV	CGP	Cell-line	Head&Neck	Squamous_cell_carcinoma	-	-	-	-
562	8003	no	BB65-RCC	BB65-EBV	CGP	Cell-line	RCC	RCC	-	-	-	-
563	8004	no	CP50-MEL-B	CP50-EBV	CGP	Cell-line	melanoma	melanoma	-	-	-	-
565	8006	no	HA7-RCC	HA7-EBV	CGP	Cell-line	RCC	RCC	-	-	-	-
566	8007	no	J82	J82-EBV	CGP	Cell-line	bladder	bladder	-	-	-	-
567	8008	no	D-542MG	L542	CGP	Cell-line	glioma	glioma	-	-	-	-
568	8009	no	LB831-BLC	LB831-EBV	CGP	Cell-line	bladder	bladder	-	-	-	-
569	8010	no	LB373-MEL-D	LB373-EBV	CGP	Cell-line	melanoma	melanoma	-	-	-	-
570	8011	no	LB647-SCLC	LB647-PBL	CGP	Cell-line	Lung	Small cell	-	-	-	-
571	8012	no	LB771-HNC	LB771-PBL	CGP	Cell-line	Head&Neck	Squamous_cell_carcinoma	-	-	-	-
572	8013	no	MZ7-mel	MZ7-B	CGP	Cell-line	Melanoma	Melanoma	-	-	-	-
573	8014	no	MZ1-PC	MZ1-B	CGP	Cell-line	Pancreas	ductal	-	-	-	-
574	8015	no	LS-1034	LS1034-PBL	CGP	Cell-line	Colorectal	adenocarcinoma	-	-	-	-
575	8016	no	LB996-RCC	LB996-EBV	CGP	Cell-line	RCC	RCC	-	-	-	-
576	8017	no	NCI-H128	NCI-BL128	CGP	Cell-line	Lung	Small cell	-	-	-	-
577	8018	no	NCI-H2171	NCI-BL2171	CGP	Cell-line	Lung	Small cell	-	-	-	-
578	8019	no	NCI-H2009	NCI-BL2009	CGP	Cell-line	Lung	adenocarcinoma	-	-	-	-
579	8020	no	NCI-H2052	NCI-BL2052	CGP	Cell-line	mesothelioma	mesothelioma	-	-	-	-
581	8022	no	NCI-H2122	NCI-BL2122	CGP	Cell-line	Lung	adenocarcinoma	-	-	-	-
582	8023	no	NCI-H2126	NCI-BL2126	CGP	Cell-line	Lung	adenocarcinoma	-	-	-	-
583	8024	no	LB2518-MEL	LB2518-EBV	CGP	Cell-line	melanoma	melanoma	-	-	-	-
584	8025	no	LB2241-RCC	LB2241-EBV	CGP	Cell-line	RCC	RCC	-	-	-	-
585	8026	no	NCI-H1437	NCI-BL1437	CGP	Cell-line	Lung	adenocarcinoma	-	-	-	-
586	8027	no	NCI-H1770	NCI-BL1770	CGP	Cell-line	Lung	non small cell	-	-	-	-
587	8028	no	LB1047-RCC	LB1047-EBV	CGP	Cell-line	RCC	RCC	-	-
