# Supplementary material for: Frequent somatic transfer of mitochondrial DNA into the nuclear genome of human cancer cells
Source: Genome Res. 2015 Jun;25(6):814–24. doi: 10.1101/gr.190470.115 (PMC4448678; doi:10.1101/gr.190470.115)
Supplement: Supplemental Material [file supp_gr.190470.115_TableS4.xlsx]

## Sheet: Sheet1
* This analysis is related with previous analyses from Dan Mishmar et al., Human Mutation 23:125-133 (2004)
		Controls (in silico random)		Somatic_insertions
Category	remark	Numbers from simulation	proportion	Numbers (observed)	proportion	Numbers (expected from simulated distribution)
A	within transposable elements	499	0.499	11	0.44	12.475
B	<=15bp	27	0.027	0	0	0.675
C	<=150bp	185	0.185	3	0.12	4.625
D	>150bp	289	0.289	11	0.44	7.225
							Chi-square p	0.334941
			Real data
	Tissue	Sample	chr	pos	distance_from_nearest_repetitive_seq	neareast_repetitive_seq	strand_neareast_repetitive_seq	distance_category
real	Breast	PD11372a	10	81670932	526	LTR(ERV1)chr10:81670062	-	D
real	Breast	PD11372a	10	78920385	0	SINE(MIR)chr10:78920332	+	A
real	Breast	PD4252a	X	45631665	-483	SINE(MIR)chrX:45632147	+	D
real	Breast	PD4252a	X	45652120	0	DNA(hAT-Charlie)chrX:45651859	+	A
real	Breast	PD6047a	X	14944764	-160	DNA(TcMar?)chrX:14944923	+	D
real	Breast	PD6047a	7	96923229	-379	SINE(Alu)chr7:96923608	-	D
real	Breast	PD10014a	17	75618348	0	SINE(Alu)chr17:75618213	-	A
real	Breast	PD10014a	17	75688733	-63	Simple_repeat(Simple_repeat)chr17:75688795	+	C
real	Breast	PD13296a	4	102463870	0	SINE(Alu)chr4:102463762	+	A
real	Breast	PD13296a	4	102464084	22	SINE(Alu)chr4:102463762	+	C
real	Breast	PD13296a	6	103639248	0	LTR(ERVL-MaLR)chr6:103638988	-	A
real	Breast	PD13296a	6	103690941	-20	SINE(MIR)chr6:103690960	+	C
real	Breast	PD6728b	2	138664890	268	LINE(L1)chr2:138664450	-	D
real	Breast	PD6728b	2	139012040	0	LTR(ERV1)chr2:139011402	+	A
real	Breast	PD11397a	19	12650382	0	SINE(Alu)chr19:12650191	+	A
real	Breast	PD11397a	17	40005738	-1660	SINE(Alu)chr17:40007397	+	D
real	Breast	PD7404a	1	44914376	0	LINE(L2)chr1:44914325	-	A
real	Breast	PD6733b	6	45823498	226	SINE(MIR)chr6:45823055	-	D
real	Breast	PD11768a	1	144944326	-217	SINE(MIR)chr1:144944543	-	D
real	Melanoma	CP66-MEL	3	47419506	0	SINE(Alu)chr3:47419206	-	A
real	Melanoma	CP66-MEL	3	47419447	0	SINE(Alu)chr3:47419206	-	A
real	Lung	NCI-H2087	10	26775605	-536	Simple_repeat(Simple_repeat)chr10:26776140	+	D
real	Lung	NCI-H2087	20	33836717	-262	SINE(MIR)chr20:33836978	+	D
real	Lung	NCI-H2087	17	7481787	-1466	Simple_repeat(Simple_repeat)chr17:7483252	+	D
real	Lung	NCI-H2087	17	31744235	0	LINE(CR1)chr17:31744235	-	A
in silico	InSilicoRandom	InSilicoRandom	10	1338574	-681	LTR(ERVL-MaLR)chr10:1339254	+	D
in silico	InSilicoRandom	InSilicoRandom	10	90281704	-722	LINE(CR1)chr10:90282425	+	D
in silico	InSilicoRandom	InSilicoRandom	10	102989924	-393	Simple_repeat(Simple_repeat)chr10:102990316	+	D
in silico	InSilicoRandom	InSilicoRandom	10	84468066	0	LINE(L1)chr10:84468058	-	A
in silico	InSilicoRandom	InSilicoRandom	10	38450122	0	SINE(Alu)chr10:38450049	-	A
in silico	InSilicoRandom	InSilicoRandom	10	29323588	0	LINE(L1)chr10:29323446	+	A
in silico	InSilicoRandom	InSilicoRandom	10	97372882	-18	DNA(DNA)chr10:97372899	+	C
in silico	InSilicoRandom	InSilicoRandom	10	37389426	0	LINE(L1)chr10:37388961	+	A
in silico	InSilicoRandom	InSilicoRandom	10	28766930	0	SINE(Alu)chr10:28766821	+	A
in silico	InSilicoRandom	InSilicoRandom	10	81147334	252	SINE(MIR)chr10:81147005	+	D
in silico	InSilicoRandom	InSilicoRandom	10	4734747	0	DNA(hAT-Charlie)chr10:4734669	-	A
in silico	InSilicoRandom	InSilicoRandom	10	28929984	0	SINE(MIR)chr10:28929794	+	A
in silico	InSilicoRandom	InSilicoRandom	10	91885752	41	SINE(MIR)chr10:91885549	-	C
in silico	InSilicoRandom	InSilicoRandom	10	134548143	1332	LTR(ERVL-MaLR)chr10:134546431	-	D
in silico	InSilicoRandom	InSilicoRandom	10	76800729	151	SINE(MIR)chr10:76800428	+	D
in silico	InSilicoRandom	InSilicoRandom	10	85282032	0	SINE(Alu)chr10:85281778	-	A
in silico	InSilicoRandom	InSilicoRandom	10	77218724	-193	SINE(Alu)chr10:77218916	+	D
in silico	InSilicoRandom	InSilicoRandom	10	103155256	-911	SINE(Alu)chr10:103156167	-	D
in silico	InSilicoRandom	InSilicoRandom	10	38681501	-1570	DNA(hAT-Charlie)chr10:38683070	+	D
in silico	InSilicoRandom	InSilicoRandom	10	15452623	157	SINE(Alu)chr10:15452163	+	D
in silico	InSilicoRandom	InSilicoRandom	10	127302713	0	LINE(L1)chr10:127301853	-	A
in silico	InSilicoRandom	InSilicoRandom	10	98464716	112	DNA(hAT-Charlie)chr10:98464505	+	C
in silico	InSilicoRandom	InSilicoRandom	10	60143	-820	LINE(L1)chr10:60963	-	D
in silico	InSilicoRandom	InSilicoRandom	10	87516303	0	DNA(TcMar-Tigger)chr10:87515785	-	A
in silico	InSilicoRandom	InSilicoRandom	10	89525326	0	LINE(L1)chr10:89525258	+	A
in silico	InSilicoRandom	InSilicoRandom	10	45792251	0	SINE(Alu)chr10:45792027	-	A
in silico	InSilicoRandom	InSilicoRandom	10	80513860	14	LINE(L2)chr10:80513554	-	B
in silico	InSilicoRandom	InSilicoRandom	10	103534284	-958	SINE(MIR)chr10:103535241	+	D
in silico	InSilicoRandom	InSilicoRandom	10	69618710	0	LINE(L1)chr10:69618691	-	A
in silico	InSilicoRandom	InSilicoRandom	10	55969812	-299	LINE(L2)chr10:55970111	-	D
in silico	InSilicoRandom	InSilicoRandom	10	62673429	0	DNA(hAT-Charlie)chr10:62673337	+	A
in silico	InSilicoRandom	InSilicoRandom	10	47964006	0	SINE(Alu)chr10:47963835	+	A
in silico	InSilicoRandom	InSilicoRandom	10	19164138	0	LTR(ERVL)chr10:19163261	+	A
in silico	InSilicoRandom	InSilicoRandom	10	101129983	293	DNA(TcMar-Tigger)chr10:101129602	-	D
in silico	InSilicoRandom	InSilicoRandom	10	65219543	0	LTR(ERVL-MaLR)chr10:65219517	-	A
in silico	InSilicoRandom	InSilicoRandom	10	81319661	0	SINE(MIR)chr10:81319491	+	A
in silico	InSilicoRandom	InSilicoRandom	10	26878939	70	SINE(Alu)chr10:26878573	-	C
in silico	InSilicoRandom	InSilicoRandom	10	8697180	0	LINE(L1)chr10:8696505	+	A
in silico	InSilicoRandom	InSilicoRandom	10	33280025	-187	LINE(L1)chr10:33280212	-	D
in silico	InSilicoRandom	InSilicoRandom	10	28219618	37	SINE(Alu)chr10:28219456	+	C
in silico	InSilicoRandom	InSilicoRandom	10	84716081	187	LTR(ERVL)chr10:84715580	+	D
in silico	InSilicoRandom	InSilicoRandom	10	21619913	0	SINE(Alu)chr10:21619885	-	A
in silico	InSilicoRandom	InSilicoRandom	10	9855251	0	LTR(ERVL)chr10:9855076	-	A
in silico	InSilicoRandom	InSilicoRandom	10	131989203	-227	LINE(L1)chr10:131989430	-	D
in silico	InSilicoRandom	InSilicoRandom	10	130473193	0	SINE(Alu)chr10:130473149	+	A
in silico	InSilicoRandom	InSilicoRandom	10	118056099	0	LINE(L2)chr10:118055977	+	A
in silico	InSilicoRandom	InSilicoRandom	10	66527928	734	SINE(Alu)chr10:66526878	+	D
in silico	InSilicoRandom	InSilicoRandom	10	114109712	0	LTR(ERV1)chr10:114109331	+	A
in silico	InSilicoRandom	InSilicoRandom	10	70128474	0	LINE(L1)chr10:70128437	+	A
in silico	InSilicoRandom	InSilicoRandom	10	79567326	-698	SINE(Alu)chr10:79568024	-	D
in silico	InSilicoRandom	InSilicoRandom	10	35797975	0	LINE(L1)chr10:35797663	-	A
in silico	InSilicoRandom	InSilicoRandom	10	22908540	0	SINE(Alu)chr10:22908355	-	A
in silico	InSilicoRandom	InSilicoRandom	10	20777937	-85	DNA(hAT-Charlie)chr10:20778021	+	C
in silico	InSilicoRandom	InSilicoRandom	10	135143661	0	LINE(L1)chr10:135143588	+	A
in silico	InSilicoRandom	InSilicoRandom	10	127196248	1134	LINE(L1)chr10:127194797	+	D
in silico	InSilicoRandom	InSilicoRandom	10	28378074	0	SINE(Alu)chr10:28377812	-	A
in silico	InSilicoRandom	InSilicoRandom	10	54911359	0	SINE(Alu)chr10:54911356	+	A
in silico	InSilicoRandom	InSilicoRandom	10	78680542	49	SINE(MIR)chr10:78680285	-	C
in silico	InSilicoRandom	InSilicoRandom	10	131248253	0	DNA(hAT-Tip100)chr10:131247853	-	A
in silico	InSilicoRandom	InSilicoRandom	10	74029771	0	SINE(Alu)chr10:74029633	-	A
in silico	InSilicoRandom	InSilicoRandom	10	120967311	-20	Simple_repeat(Simple_repeat)chr10:120967330	+	C
in silico	InSilicoRandom	InSilicoRandom	10	18242773	-275	DNA(hAT-Charlie)chr10:18243048	-	D
in silico	InSilicoRandom	InSilicoRandom	10	135424996	0	LINE(L1)chr10:135424770	+	A
in silico	InSilicoRandom	InSilicoRandom	10	18734064	496	SINE(MIR)chr10:18733347	-	D
in silico	InSilicoRandom	InSilicoRandom	10	111552660	0	LTR(ERVL-MaLR)chr10:111552369	-	A
in silico	InSilicoRandom	InSilicoRandom	10	117070186	0	LINE(L1)chr10:117068244	-	A
in silico	InSilicoRandom	InSilicoRandom	10	67885271	0	LINE(L1)chr10:67884700	+	A
in silico	InSilicoRandom	InSilicoRandom	10	76328414	15	LTR(ERV1)chr10:76328205	-	B
in silico	InSilicoRandom	InSilicoRandom	10	5536249	-14	SINE(Alu)chr10:5536262	+	B
in silico	InSilicoRandom	InSilicoRandom	10	17716608	0	LTR(ERVL-MaLR)chr10:17716252	-	A
in silico	InSilicoRandom	InSilicoRandom	10	22688534	91	LINE(L1)chr10:22688058	-	C
in silico	InSilicoRandom	InSilicoRandom	10	54008198	136	LTR(ERVK)chr10:54007549	-	C
in silico	InSilicoRandom	InSilicoRandom	10	28979868	-68	SINE(Alu)chr10:28979936	-	C
in silico	InSilicoRandom	InSilicoRandom	10	108475561	0	SINE(Alu)chr10:108475511	-	A
in silico	InSilicoRandom	InSilicoRandom	10	122678275	-74	SINE(Alu)chr10:122678348	+	C
in silico	InSilicoRandom	InSilicoRandom	10	57620422	0	LINE(L1)chr10:57620287	-	A
in silico	InSilicoRandom	InSilicoRandom	10	34805446	254	SINE(Alu)chr10:34804911	-	D
in silico	InSilicoRandom	InSilicoRandom	10	20872307	0	LINE(L1)chr10:20872265	-	A
in silico	InSilicoRandom	InSilicoRandom	10	88841220	-1496	SINE(Alu)chr10:88842715	+	D
in silico	InSilicoRandom	InSilicoRandom	10	49423644	78	SINE(MIR)chr10:49423482	+	C
in silico	InSilicoRandom	InSilicoRandom	X	144382104	0	LINE(L1)chrX:144381781	-	A
in silico	InSilicoRandom	InSilicoRandom	X	76164865	0	LINE(L1)chrX:76163420	-	A
in silico	InSilicoRandom	InSilicoRandom	X	47875012	0	SINE(Alu)chrX:47874812	+	A
in silico	InSilicoRandom	InSilicoRandom	X	106996900	-235	SINE(Alu)chrX:106997135	-	D
in silico	InSilicoRandom	InSilicoRandom	X	373027	0	SINE(Alu)chrX:372713	+	A
in silico	InSilicoRandom	InSilicoRandom	X	8328750	999	DNA(hAT-Charlie)chrX:8327575	-	D
in silico	InSilicoRandom	InSilicoRandom	X	73079123	0	LINE(L1)chrX:73079083	-	A
in silico	InSilicoRandom	InSilicoRandom	X	106182681	252	LINE(L2)chrX:106182011	-	D
in silico	InSilicoRandom	InSilicoRandom	X	140837269	-162	Simple_repeat(Simple_repeat)chrX:140837430	+	D
in silico	InSilicoRandom	InSilicoRandom	X	37074127	-1	SINE(Alu)chrX:37074127	+	B
in silico	InSilicoRandom	InSilicoRandom	X	36461492	0	LTR(ERVL)chrX:36461260	-	A
in silico	InSilicoRandom	InSilicoRandom	X	32126457	0	LINE(L1)chrX:32126324	+	A
in silico	InSilicoRandom	InSilicoRandom	X	34667647	0	LINE(L1)chrX:34666021	+	A
in silico	InSilicoRandom	InSilicoRandom	X	151913870	-819	LINE(L1)chrX:151914688	+	D
in silico	InSilicoRandom	InSilicoRandom	X	147049800	0	LINE(L1)chrX:147049367	+	A
in silico	InSilicoRandom	InSilicoRandom	X	1791220	0	SINE(Alu)chrX:1791060	+	A
in silico	InSilicoRandom	InSilicoRandom	X	51977892	0	LINE(L1)chrX:51977521	-	A
in silico	InSilicoRandom	InSilicoRandom	X	447965	0	SINE(Alu)chrX:447822	-	A
in silico	InSilicoRandom	InSilicoRandom	X	70824348	-580	LINE(L2)chrX:70824927	+	D
in silico	InSilicoRandom	InSilicoRandom	X	134363803	0	DNA(TcMar-Tigger)chrX:134363712	+	A
in silico	InSilicoRandom	InSilicoRandom	X	40317034	0	LTR(ERVL-MaLR)chrX:40316882	+	A
in silico	InSilicoRandom	InSilicoRandom	X	20054244	0	LINE(L1)chrX:20054124	+	A
in silico	InSilicoRandom	InSilicoRandom	X	120235887	0	DNA(hAT-Charlie)chrX:120235854	-	A
in silico	InSilicoRandom	InSilicoRandom	X	19703735	-784	DNA(hAT-Charlie)chrX:19704518	+	D
in silico	InSilicoRandom	InSilicoRandom	X	115422893	0	LTR(ERV1)chrX:115420772	+	A
in silico	InSilicoRandom	InSilicoRandom	X	130288878	0	LINE(L1)chrX:130286246	-	A
in silico	InSilicoRandom	InSilicoRandom	X	82914148	0	LINE(L1)chrX:82913951	-	A
in silico	InSilicoRandom	InSilicoRandom	X	41763599	0	LINE(L1)chrX:41763489	+	A
in silico	InSilicoRandom	InSilicoRandom	X	105221365	0	LINE(L1)chrX:105220455	-	A
in silico	InSilicoRandom	InSilicoRandom	X	69307916	97	SINE(MIR)chrX:69307599	+	C
in silico	InSilicoRandom	InSilicoRandom	X	15523942	-94	SINE(Alu)chrX:15524036	-	C
in silico	InSilicoRandom	InSilicoRandom	X	49452158	67	LINE(L1)chrX:49451802	+	C
in silico	InSilicoRandom	InSilicoRandom	X	24461291	67	DNA(hAT)chrX:24461012	+	C
in silico	InSilicoRandom	InSilicoRandom	X	119167621	0	LTR(ERV1)chrX:119167268	+	A
in silico	InSilicoRandom	InSilicoRandom	X	39292185	268	LINE(L2)chrX:39291810	-	D
in silico	InSilicoRandom	InSilicoRandom	X	18308983	-1118	LINE(L1)chrX:18310100	+	D
in silico	InSilicoRandom	InSilicoRandom	X	20466805	0	LINE(L2)chrX:20466422	+	A
in silico	InSilicoRandom	InSilicoRandom	X	48291910	0	LINE(L1)chrX:48291859	+	A
in silico	InSilicoRandom	InSilicoRandom	X	91462823	-91	SINE(Alu)chrX:91462913	+	C
in silico	InSilicoRandom	InSilicoRandom	X	82046436	0	LINE(L1)chrX:82043282	+	A
in silico	InSilicoRandom	InSilicoRandom	X	112455162	0	LINE(L1)chrX:112449858	-	A
in silico	InSilicoRandom	InSilicoRandom	X	48584478	-243	SINE(Alu)chrX:48584720	+	D
in silico	InSilicoRandom	InSilicoRandom	X	94631105	0	LINE(L1)chrX:94630362	+	A
in silico	InSilicoRandom	InSilicoRandom	X	21816590	0	SINE(MIR)chrX:21816421	+	A
in silico	InSilicoRandom	InSilicoRandom	X	35740317	156	LINE(L1)chrX:35740022	-	D
in silico	InSilicoRandom	InSilicoRandom	X	131399903	0	SINE(Alu)chrX:131399669	-	A
in silico	InSilicoRandom	InSilicoRandom	X	100365263	894	SINE(Alu)chrX:100364064	-	D
in silico	InSilicoRandom	InSilicoRandom	X	17061750	531	SINE(Alu)chrX:17060929	-	D
in silico	InSilicoRandom	InSilicoRandom	X	7717123	78	LINE(L1)chrX:7715964	-	C
in silico	InSilicoRandom	InSilicoRandom	X	4769937	0	LINE(L1)chrX:4769728	-	A
in silico	InSilicoRandom	InSilicoRandom	X	151588720	0	LINE(L1)chrX:151587780	+	A
in silico	InSilicoRandom	InSilicoRandom	X	12792337	0	SINE(MIR)chrX:12792234	+	A
in silico	InSilicoRandom	InSilicoRandom	X	69698884	-2144	LINE(L2)chrX:69701027	+	D
in silico	InSilicoRandom	InSilicoRandom	X	26627592	0	LINE(L1)chrX:26627414	+	A
in silico	InSilicoRandom	InSilicoRandom	X	97366808	245	LINE(L2)chrX:97366266	+	D
in silico	InSilicoRandom	InSilicoRandom	X	120352306	0	SINE(MIR)chrX:120352190	+	A
in silico	InSilicoRandom	InSilicoRandom	X	68486855	-45	LINE(L2)chrX:68486900	-	C
in silico	InSilicoRandom	InSilicoRandom	X	109909371	96	DNA(hAT-Tip100)chrX:109909119	+	C
in silico	InSilicoRandom	InSilicoRandom	X	137533059	0	SINE(MIR)chrX:137532908	+	A
in silico	InSilicoRandom	InSilicoRandom	X	13975291	-150	Simple_repeat(Simple_repeat)chrX:13975440	+	C
in silico	InSilicoRandom	InSilicoRandom	X	145070016	0	LTR(ERVL-MaLR)chrX:145069766	+	A
in silico	InSilicoRandom	InSilicoRandom	X	97001726	-229	LTR(ERV1)chrX:97001955	-	D
in silico	InSilicoRandom	InSilicoRandom	X	10103101	-28	DNA(hAT-Charlie)chrX:10103129	-	C
in silico	InSilicoRandom	InSilicoRandom	X	148198191	0	LTR(ERV1)chrX:148198169	+	A
in silico	InSilicoRandom	InSilicoRandom	X	45733553	0	LTR(ERVL-MaLR)chrX:45733017	+	A
in silico	InSilicoRandom	InSilicoRandom	X	54966812	0	LINE(L1)chrX:54964807	+	A
in silico	InSilicoRandom	InSilicoRandom	X	92904720	0	LTR(ERVL-MaLR)chrX:92903886	+	A
in silico	InSilicoRandom	InSilicoRandom	X	130579924	128	SINE(Alu)chrX:130579518	-	C
in silico	InSilicoRandom	InSilicoRandom	X	7132801	0	LINE(L1)chrX:7132592	-	A
in silico	InSilicoRandom	InSilicoRandom	X	117371793	25	SINE(Alu)chrX:117371475	-	C
in silico	InSilicoRandom	InSilicoRandom	X	17393384	-69	Simple_repeat(Simple_repeat)chrX:17393452	+	C
in silico	InSilicoRandom	InSilicoRandom	X	31687442	0	LINE(L1)chrX:31686593	-	A
in silico	InSilicoRandom	InSilicoRandom	X	95558330	0	LINE(L1)chrX:95557571	+	A
in silico	InSilicoRandom	InSilicoRandom	X	130691752	0	LINE(L1)chrX:130690881	+	A
in silico	InSilicoRandom	InSilicoRandom	X	150617444	0	LINE(L1)chrX:150617402	-	A
in silico	InSilicoRandom	InSilicoRandom	X	152818575	144	LTR(ERVL-MaLR)chrX:152818143	-	C
in silico	InSilicoRandom	InSilicoRandom	X	114271091	0	LTR(Gypsy)chrX:114270728	+	A
in silico	InSilicoRandom	InSilicoRandom	X	93543212	267	SINE(MIR)chrX:93542689	-	D
in silico	InSilicoRandom	InSilicoRandom	X	46997678	-21	LINE(L2)chrX:46997698	+	C
in silico	InSilicoRandom	InSilicoRandom	X	150335784	0	SINE(Alu)chrX:150335575	+	A
in silico	InSilicoRandom	InSilicoRandom	X	150255234	0	LINE(L1)chrX:150254996	-	A
in silico	InSilicoRandom	InSilicoRandom	X	110459968	-354	SINE(MIR)chrX:110460322	-	D
in silico	InSilicoRandom	InSilicoRandom	X	23873115	-27	SINE(Alu)chrX:23873142	-	C
in silico	InSilicoRandom	InSilicoRandom	X	122594311	0	LINE(L1)chrX:122594245	+	A
in silico	InSilicoRandom	InSilicoRandom	X	65081128	0	LINE(CR1)chrX:65080989	+	A
in silico	InSilicoRandom	InSilicoRandom	X	151455416	-339	LTR(ERVL-MaLR)chrX:151455754	+	D
in silico	InSilicoRandom	InSilicoRandom	X	90840503	0	LINE(L1)chrX:90840090	+	A
in silico	InSilicoRandom	InSilicoRandom	X	126626434	0	LTR(ERVK)chrX:126625663	-	A
in silico	InSilicoRandom	InSilicoRandom	X	89507406	0	LINE(L1)chrX:89502634	+	A
in silico	InSilicoRandom	InSilicoRandom	X	53270525	0	SINE(Alu)chrX:53270275	-	A
in silico	InSilicoRandom	InSilicoRandom	X	69066722	288	SINE(Alu)chrX:69066123	-	D
in silico	InSilicoRandom	InSilicoRandom	X	10655653	0	LINE(L1)chrX:10655596	-	A
in silico	InSilicoRandom	InSilicoRandom	X	123404685	-293	DNA(TcMar-Mariner)chrX:123404978	-	D
in silico	InSilicoRandom	InSilicoRandom	X	114559400	-162	SINE(Alu)chrX:114559561	+	D
in silico	InSilicoRandom	InSilicoRandom	X	138951225	0	LINE(L1)chrX:138950912	+	A
in silico	InSilicoRandom	InSilicoRandom	X	112286700	0	LINE(L1)chrX:112284809	-	A
in silico	InSilicoRandom	InSilicoRandom	X	20154654	-431	LINE(L1)chrX:20155084	+	D
in silico	InSilicoRandom	InSilicoRandom	X	81806126	0	LINE(L1)chrX:81801961	-	A
in silico	InSilicoRandom	InSilicoRandom	X	117932795	0	LTR(ERV1)chrX:117932735	+	A
in silico	InSilicoRandom	InSilicoRandom	X	147043565	61	LTR(ERVL-MaLR)chrX:147043137	+	C
in silico	InSilicoRandom	InSilicoRandom	X	88605262	0	LINE(L1)chrX:88603706	-	A
in silico	InSilicoRandom	InSilicoRandom	X	994282	0	SINE(Alu)chrX:994249	-	A
in silico	InSilicoRandom	InSilicoRandom	X	81555546	0	LINE(L1)chrX:81555140	+	A
in silico	InSilicoRandom	InSilicoRandom	X	153716173	3103	SINE(MIR)chrX:153712994	+	D
in silico	InSilicoRandom	InSilicoRandom	X	44336099	0	SINE(Alu)chrX:44335887	+	A
in silico	InSilicoRandom	InSilicoRandom	X	106394808	32	Simple_repeat(Simple_repeat)chrX:106394745	+	C
in silico	InSilicoRandom	InSilicoRandom	X	120161404	368	DNA(hAT-Charlie)chrX:120160872	-	D
in silico	InSilicoRandom	InSilicoRandom	X	76988018	0	LINE(L1)chrX:76987851	+	A
in silico	InSilicoRandom	InSilicoRandom	X	144808583	-885	LINE(CR1)chrX:144809467	+	D
in silico	InSilicoRandom	InSilicoRandom	X	91625171	0	LINE(L1)chrX:91624956	-	A
in silico	InSilicoRandom	InSilicoRandom	X	13403480	0	DNA(hAT-Charlie)chrX:13403447	-	A
in silico	InSilicoRandom	InSilicoRandom	X	87968856	542	Simple_repeat(Simple_repeat)chrX:87968280	+	D
in silico	InSilicoRandom	InSilicoRandom	X	72847128	0	LINE(L1)chrX:72846011	-	A
in silico	InSilicoRandom	InSilicoRandom	X	83055909	229	LINE(L1)chrX:83055535	+	D
in silico	InSilicoRandom	InSilicoRandom	X	104341265	0	LINE(L1)chrX:104340130	+	A
in silico	InSilicoRandom	InSilicoRandom	X	64369937	240	Simple_repeat(Simple_repeat)chrX:64369644	+	D
in silico	InSilicoRandom	InSilicoRandom	X	44027342	0	LINE(L1)chrX:44027142	+	A
in silico	InSilicoRandom	InSilicoRandom	X	128080436	112	DNA(hAT-Charlie)chrX:128080243	+	C
in silico	InSilicoRandom	InSilicoRandom	X	132475332	-367	Simple_repeat(Simple_repeat)chrX:132475698	+	D
in silico	InSilicoRandom	InSilicoRandom	X	119494231	712	LINE(L2)chrX:119493414	+	D
in silico	InSilicoRandom	InSilicoRandom	7	132574655	1042	LINE(L1)chr7:132573310	+	D
in silico	InSilicoRandom	InSilicoRandom	7	105262261	-677	LTR(ERVL-MaLR)chr7:105262937	+	D
in silico	InSilicoRandom	InSilicoRandom	7	90311043	0	DNA(TcMar-Tigger)chr7:90310869	+	A
in silico	InSilicoRandom	InSilicoRandom	7	22000167	-125	LTR(ERVL-MaLR)chr7:22000291	+	C
in silico	InSilicoRandom	InSilicoRandom	7	53921129	-388	LTR(ERVL)chr7:53921517	-	D
in silico	InSilicoRandom	InSilicoRandom	7	52172546	0	LINE(L1)chr7:52170117	+	A
in silico	InSilicoRandom	InSilicoRandom	7	154496552	0	DNA(TcMar-Tigger)chr7:154495666	+	A
in silico	InSilicoRandom	InSilicoRandom	7	31474627	0	LINE(L2)chr7:31474592	+	A
in silico	InSilicoRandom	InSilicoRandom	7	125569648	471	LINE(L1)chr7:125568840	+	D
in silico	InSilicoRandom	InSilicoRandom	7	114989520	648	LINE(L1)chr7:114988698	-	D
in silico	InSilicoRandom	InSilicoRandom	7	72128988	-124	LINE(L2)chr7:72129111	+	C
in silico	InSilicoRandom	InSilicoRandom	7	9791402	-412	LINE(L1)chr7:9791814	-	D
in silico	InSilicoRandom	InSilicoRandom	7	105827958	0	DNA(TcMar-Tigger)chr7:105827932	-	A
in silico	InSilicoRandom	InSilicoRandom	7	149641644	-512	LTR(ERVL)chr7:149642156	-	D
in silico	InSilicoRandom	InSilicoRandom	7	6683885	-514	LINE(CR1)chr7:6684399	-	D
in silico	InSilicoRandom	InSilicoRandom	7	80874294	115	LINE(L1)chr7:80873623	+	C
in silico	InSilicoRandom	InSilicoRandom	7	138020688	0	SINE(Alu)chr7:138020632	-	A
in silico	InSilicoRandom	InSilicoRandom	7	65311504	0	SINE(Alu)chr7:65311447	-	A
in silico	InSilicoRandom	InSilicoRandom	7	5840650	0	LTR(ERV1)chr7:5840641	-	A
in silico	InSilicoRandom	InSilicoRandom	7	151104837	0	SINE(Alu)chr7:151104642	+	A
in silico	InSilicoRandom	InSilicoRandom	7	122573048	0	LINE(L1)chr7:122572750	-	A
in silico	InSilicoRandom	InSilicoRandom	7	149608920	0	SINE(MIR)chr7:149608856	+	A
in silico	InSilicoRandom	InSilicoRandom	7	48281329	-693	SINE(Alu)chr7:48282022	-	D
in silico	InSilicoRandom	InSilicoRandom	7	74944224	-126	SINE(Alu)chr7:74944349	+	C
in silico	InSilicoRandom	InSilicoRandom	7	22052962	-380	Simple_repeat(Simple_repeat)chr7:22053341	+	D
in silico	InSilicoRandom	InSilicoRandom	7	13350614	0	LTR(ERV1)chr7:13350466	+	A
in silico	InSilicoRandom	InSilicoRandom	7	125984951	0	LINE(L1)chr7:125984939	+	A
in silico	InSilicoRandom	InSilicoRandom	7	34137291	0	DNA(hAT-Charlie)chr7:34137197	-	A
in silico	InSilicoRandom	InSilicoRandom	7	67246713	251	LINE(L1)chr7:67246391	-	D
in silico	InSilicoRandom	InSilicoRandom	7	155936949	-52	LINE(CR1)chr7:155937001	-	C
in silico	InSilicoRandom	InSilicoRandom	7	69874653	297	Simple_repeat(Simple_repeat)chr7:69874317	+	D
in silico	InSilicoRandom	InSilicoRandom	7	142932482	0	LINE(L1)chr7:142932284	-	A
in silico	InSilicoRandom	InSilicoRandom	7	93414007	0	LTR(ERVL-MaLR)chr7:93413741	-	A
in silico	InSilicoRandom	InSilicoRandom	7	119697281	0	LTR(ERV1)chr7:119695019	-	A
in silico	InSilicoRandom	InSilicoRandom	7	100475690	0	SINE(Alu)chr7:100475651	+	A
in silico	InSilicoRandom	InSilicoRandom	7	13819884	419	LTR(ERVL)chr7:13818966	-	D
in silico	InSilicoRandom	InSilicoRandom	7	32532125	0	SINE(Alu)chr7:32531855	+	A
in silico	InSilicoRandom	InSilicoRandom	7	128583129	0	SINE(Alu)chr7:128583077	-	A
in silico	InSilicoRandom	InSilicoRandom	7	64961293	-1480	LINE(L1)chr7:64962772	+	D
in silico	InSilicoRandom	InSilicoRandom	7	98876563	0	SINE(Alu)chr7:98876532	+	A
in silico	InSilicoRandom	InSilicoRandom	17	48927708	-235	SINE(MIR)chr17:48927943	-	D
in silico	InSilicoRandom	InSilicoRandom	17	66543125	0	DNA(TcMar-Tigger)chr17:66542990	-	A
in silico	InSilicoRandom	InSilicoRandom	17	44185873	0	LINE(L2)chr17:44184620	+	A
in silico	InSilicoRandom	InSilicoRandom	17	42990954	439	SINE(MIR)chr17:42990479	+	D
in silico	InSilicoRandom	InSilicoRandom	17	68472745	445	SINE(Alu)chr17:68471990	-	D
in silico	InSilicoRandom	InSilicoRandom	17	66187498	604	LTR(ERVL-MaLR)chr17:66186660	+	D
in silico	InSilicoRandom	InSilicoRandom	17	37552231	-224	SINE(MIR)chr17:37552455	-	D
in silico	InSilicoRandom	InSilicoRandom	17	28064815	55	SINE(MIR)chr17:28064565	+	C
in silico	InSilicoRandom	InSilicoRandom	17	20656036	90	SINE(Alu)chr17:20655643	-	C
in silico	InSilicoRandom	InSilicoRandom	17	62291798	347	Simple_repeat(Simple_repeat)chr17:62291424	+	D
in silico	InSilicoRandom	InSilicoRandom	17	32263036	0	SINE(MIR)chr17:32262975	+	A
in silico	InSilicoRandom	InSilicoRandom	17	57015137	0	SINE(Alu)chr17:57014955	+	A
in silico	InSilicoRandom	InSilicoRandom	17	37391827	-25	LINE(L2)chr17:37391852	-	C
in silico	InSilicoRandom	InSilicoRandom	17	5158458	-627	SINE(Alu)chr17:5159084	+	D
in silico	InSilicoRandom	InSilicoRandom	17	12624289	0	SINE(Alu)chr17:12624056	+	A
in silico	InSilicoRandom	InSilicoRandom	17	72219705	34	SINE(Alu)chr17:72219569	-	C
in silico	InSilicoRandom	InSilicoRandom	17	43430783	0	LINE(L2)chr17:43430733	-	A
in silico	InSilicoRandom	InSilicoRandom	17	74810294	0	SINE(Alu)chr17:74810062	+	A
in silico	InSilicoRandom	InSilicoRandom	17	52219582	0	LINE(L2)chr17:52219538	+	A
in silico	InSilicoRandom	InSilicoRandom	17	54157341	0	LINE(L1)chr17:54157288	+	A
in silico	InSilicoRandom	InSilicoRandom	17	52838497	-757	LINE(L1)chr17:52839253	+	D
in silico	InSilicoRandom	InSilicoRandom	17	38749233	0	LTR(ERV1)chr17:38748423	+	A
in silico	InSilicoRandom	InSilicoRandom	17	4755932	84	LINE(L2)chr17:4755611	-	C
in silico	InSilicoRandom	InSilicoRandom	17	17027490	54	SINE(MIR)chr17:17027332	-	C
in silico	InSilicoRandom	InSilicoRandom	17	11099665	25	DNA(hAT-Charlie)chr17:11099375	+	C
in silico	InSilicoRandom	InSilicoRandom	17	10743884	0	SINE(Alu)chr17:10743761	-	A
in silico	InSilicoRandom	InSilicoRandom	17	51258059	0	LINE(L1)chr17:51256758	-	A
in silico	InSilicoRandom	InSilicoRandom	17	42590883	0	LINE(L1)chr17:42590845	-	A
in silico	InSilicoRandom	InSilicoRandom	17	18972800	0	LINE(L1)chr17:18972681	+	A
in silico	InSilicoRandom	InSilicoRandom	17	70904892	-347	SINE(Alu)chr17:70905239	-	D
in silico	InSilicoRandom	InSilicoRandom	17	78427203	-322	DNA(TcMar-Tigger)chr17:78427524	+	D
in silico	InSilicoRandom	InSilicoRandom	17	15505829	0	LINE(L1)chr17:15505453	+	A
in silico	InSilicoRandom	InSilicoRandom	17	71463768	216	SINE(MIR)chr17:71463424	+	D
in silico	InSilicoRandom	InSilicoRandom	17	80369916	695	SINE(Alu)chr17:80368923	-	D
in silico	InSilicoRandom	InSilicoRandom	17	53371690	587	SINE(MIR)chr17:53370860	-	D
in silico	InSilicoRandom	InSilicoRandom	17	35712107	0	SINE(Alu)chr17:35711907	+	A
in silico	InSilicoRandom	InSilicoRandom	17	16150242	0	SINE(Alu)chr17:16149986	-	A
in silico	InSilicoRandom	InSilicoRandom	17	19998946	-198	SINE(MIR)chr17:19999144	-	D
in silico	InSilicoRandom	InSilicoRandom	17	12271362	46	LINE(L1)chr17:12271153	-	C
in silico	InSilicoRandom	InSilicoRandom	17	76404574	92	SINE(MIR)chr17:76404379	+	C
in silico	InSilicoRandom	InSilicoRandom	17	80132114	-116	LTR(ERV1)chr17:80132229	+	C
in silico	InSilicoRandom	InSilicoRandom	17	69055823	-331	LINE(L2)chr17:69056153	+	D
in silico	InSilicoRandom	InSilicoRandom	17	10882414	-236	LINE(L2)chr17:10882649	+	D
in silico	InSilicoRandom	InSilicoRandom	17	29245854	0	SINE(Alu)chr17:29245760	+	A
in silico	InSilicoRandom	InSilicoRandom	17	70405158	0	LTR(ERVL)chr17:70404865	+	A
in silico	InSilicoRandom	InSilicoRandom	17	59890157	-479	LINE(L2)chr17:59890635	+	D
in silico	InSilicoRandom	InSilicoRandom	17	42419912	0	SINE(Alu)chr17:42419639	+	A
in silico	InSilicoRandom	InSilicoRandom	17	35477613	127	SINE(Alu)chr17:35477189	-	C
in silico	InSilicoRandom	InSilicoRandom	17	48834096	23	SINE(Alu)chr17:48834028	+	C
in silico	InSilicoRandom	InSilicoRandom	17	64697743	0	LINE(L1)chr17:64695982	+	A
in silico	InSilicoRandom	InSilicoRandom	17	50541187	-60	LINE(L1)chr17:50541247	-	C
in silico	InSilicoRandom	InSilicoRandom	17	20015797	-1694	SINE(Alu)chr17:20017491	-	D
in silico	InSilicoRandom	InSilicoRandom	17	19847807	0	SINE(Alu)chr17:19847700	+	A
in silico	InSilicoRandom	InSilicoRandom	17	12191980	0	LTR(ERVL-MaLR)chr17:12191950	-	A
in silico	InSilicoRandom	InSilicoRandom	17	20958311	-86	LTR(ERV1)chr17:20958396	+	C
in silico	InSilicoRandom	InSilicoRandom	17	79261511	-1331	SINE(Alu)chr17:79262842	-	D
in silico	InSilicoRandom	InSilicoRandom	17	41550520	0	SINE(Alu)chr17:41550214	-	A
in silico	InSilicoRandom	InSilicoRandom	17	63053245	-134	SINE(Alu)chr17:63053379	-	C
in silico	InSilicoRandom	InSilicoRandom	17	53271326	-82	SINE(MIR)chr17:53271408	-	C
in silico	InSilicoRandom	InSilicoRandom	17	16945410	58	LINE(L2)chr17:16945321	+	C
in silico	InSilicoRandom	InSilicoRandom	17	64425467	146	LINE(L2)chr17:64425205	+	C
in silico	InSilicoRandom	InSilicoRandom	17	76784729	185	SINE(Alu)chr17:76784238	-	D
in silico	InSilicoRandom	InSilicoRandom	17	7303761	0	SINE(Alu)chr17:7303750	-	A
in silico	InSilicoRandom	InSilicoRandom	17	35427194	0	SINE(Alu)chr17:35427133	-	A
in silico	InSilicoRandom	InSilicoRandom	17	76929767	509	SINE(Alu)chr17:76929081	-	D
in silico	InSilicoRandom	InSilicoRandom	17	12681580	0	SINE(Alu)chr17:12681555	-	A
in silico	InSilicoRandom	InSilicoRandom	17	54547747	0	LINE(L1)chr17:54547150	-	A
in silico	InSilicoRandom	InSilicoRandom	17	44691542	0	LINE(L2)chr17:44691477	-	A
in silico	InSilicoRandom	InSilicoRandom	17	22037123	-46	SINE(Alu)chr17:22037169	-	C
in silico	InSilicoRandom	InSilicoRandom	17	56261879	-154	SINE(MIR)chr17:56262032	+	D
in silico	InSilicoRandom	InSilicoRandom	17	45959000	0	SINE(Alu)chr17:45958760	+	A
in silico	InSilicoRandom	InSilicoRandom	17	67714009	823	DNA(hAT-Tip100)chr17:67713096	-	D
in silico	InSilicoRandom	InSilicoRandom	17	72558084	15	LTR(ERVL)chr17:72557832	+	B
in silico	InSilicoRandom	InSilicoRandom	17	13154089	0	LINE(L1)chr17:13153969	+	A
in silico	InSilicoRandom	InSilicoRandom	17	74355745	0	SINE(Alu)chr17:74355734	-	A
in silico	InSilicoRandom	InSilicoRandom	17	1392210	302	SINE(MIR)chr17:1391742	-	D
in silico	InSilicoRandom	InSilicoRandom	17	63358363	0	SINE(Alu)chr17:63358307	-	A
in silico	InSilicoRandom	InSilicoRandom	17	6102870	0	DNA(TcMar-Tigger)chr17:6102582	+	A
in silico	InSilicoRandom	InSilicoRandom	17	73885687	197	LINE(L1)chr17:73885434	-	D
in silico	InSilicoRandom	InSilicoRandom	17	4273004	0	SINE(Alu)chr17:4273002	-	A
in silico	InSilicoRandom	InSilicoRandom	4	71809675	0	DNA(hAT-Tip100)chr4:71809607	-	A
in silico	InSilicoRandom	InSilicoRandom	4	44804454	0	LTR(ERVL)chr4:44803918	+	A
in silico	InSilicoRandom	InSilicoRandom	4	105164463	0	LINE(L1)chr4:105164305	-	A
in silico	InSilicoRandom	InSilicoRandom	4	159541629	0	LINE(L1)chr4:159541125	+	A
in silico	InSilicoRandom	InSilicoRandom	4	75596974	0	LINE(L2)chr4:75596889	+	A
in silico	InSilicoRandom	InSilicoRandom	4	91334249	0	LINE(L1)chr4:91333689	+	A
in silico	InSilicoRandom	InSilicoRandom	4	132021119	0	LTR(ERVL-MaLR)chr4:132020942	+	A
in silico	InSilicoRandom	InSilicoRandom	4	135661521	0	LINE(L1)chr4:135661399	+	A
in silico	InSilicoRandom	InSilicoRandom	4	28184323	0	LINE(L1)chr4:28182561	-	A
in silico	InSilicoRandom	InSilicoRandom	4	122035027	-129	LTR(ERVL-MaLR)chr4:122035156	-	C
in silico	InSilicoRandom	InSilicoRandom	4	15468766	82	LINE(L1)chr4:15467961	-	C
in silico	InSilicoRandom	InSilicoRandom	4	30313514	0	LTR(ERVL-MaLR)chr4:30313157	-	A
in silico	InSilicoRandom	InSilicoRandom	4	142190311	0	LINE(L1)chr4:142190219	-	A
in silico	InSilicoRandom	InSilicoRandom	4	79300719	552	LINE(L1)chr4:79299067	-	D
in silico	InSilicoRandom	InSilicoRandom	4	96355869	188	LINE(L2)chr4:96355569	-	D
in silico	InSilicoRandom	InSilicoRandom	4	89044055	0	LINE(L1)chr4:89043177	+	A
in silico	InSilicoRandom	InSilicoRandom	4	165963505	-55	DNA(TcMar-Tigger)chr4:165963560	-	C
in silico	InSilicoRandom	InSilicoRandom	4	63253269	0	LINE(L1)chr4:63252960	-	A
in silico	InSilicoRandom	InSilicoRandom	4	90762447	-170	SINE(MIR)chr4:90762616	+	D
in silico	InSilicoRandom	InSilicoRandom	4	82603619	140	SINE(MIR)chr4:82603315	+	C
in silico	InSilicoRandom	InSilicoRandom	4	95177968	155	SINE(Alu)chr4:95177497	-	D
in silico	InSilicoRandom	InSilicoRandom	4	39297259	99	SINE(MIR)chr4:39296999	-	C
in silico	InSilicoRandom	InSilicoRandom	4	53187515	0	LINE(L1)chr4:53185954	-	A
in silico	InSilicoRandom	InSilicoRandom	4	47600721	0	SINE(MIR)chr4:47600670	+	A
in silico	InSilicoRandom	InSilicoRandom	4	113070330	0	LINE(L1)chr4:113070148	-	A
in silico	InSilicoRandom	InSilicoRandom	4	48170112	685	Simple_repeat(Simple_repeat)chr4:48169383	+	D
in silico	InSilicoRandom	InSilicoRandom	4	112279622	0	SINE(MIR)chr4:112279477	-	A
in silico	InSilicoRandom	InSilicoRandom	4	119196248	-204	LTR(ERVL-MaLR)chr4:119196451	+	D
in silico	InSilicoRandom	InSilicoRandom	4	15165316	-405	SINE(MIR)chr4:15165721	-	D
in silico	InSilicoRandom	InSilicoRandom	4	169172135	160	SINE(Alu)chr4:169171676	-	D
in silico	InSilicoRandom	InSilicoRandom	4	167938157	172	SINE(Alu)chr4:167937694	-	D
in silico	InSilicoRandom	InSilicoRandom	4	136073235	-76	SINE(Alu)chr4:136073310	+	C
in silico	InSilicoRandom	InSilicoRandom	4	112196960	588	LINE(L2)chr4:112196260	-	D
in silico	InSilicoRandom	InSilicoRandom	4	182292697	1970	Simple_repeat(Simple_repeat)chr4:182290650	+	D
in silico	InSilicoRandom	InSilicoRandom	4	5477261	0	SINE(Alu)chr4:5477181	+	A
in silico	InSilicoRandom	InSilicoRandom	4	30795031	-1691	SINE(MIR)chr4:30796721	+	D
in silico	InSilicoRandom	InSilicoRandom	4	124376936	14	DNA(TcMar-Tc2)chr4:124376839	-	B
in silico	InSilicoRandom	InSilicoRandom	4	63214065	-251	LTR(ERV1)chr4:63214315	+	D
in silico	InSilicoRandom	InSilicoRandom	4	176411853	0	LINE(L1)chr4:176411677	+	A
in silico	InSilicoRandom	InSilicoRandom	4	86302549	0	LINE(L1)chr4:86301176	+	A
in silico	InSilicoRandom	InSilicoRandom	4	145161531	0	LINE(L1)chr4:145161456	+	A
in silico	InSilicoRandom	InSilicoRandom	4	183989651	0	LINE(L1)chr4:183989520	+	A
in silico	InSilicoRandom	InSilicoRandom	4	133291205	0	LINE(L1)chr4:133290053	-	A
in silico	InSilicoRandom	InSilicoRandom	4	109110960	99	DNA(hAT-Charlie)chr4:109110540	+	C
in silico	InSilicoRandom	InSilicoRandom	4	62162152	460	SINE(Alu)chr4:62161390	+	D
in silico	InSilicoRandom	InSilicoRandom	4	5746958	-537	LINE(L2)chr4:5747495	-	D
in silico	InSilicoRandom	InSilicoRandom	4	134987825	0	LINE(L1)chr4:134985749	-	A
in silico	InSilicoRandom	InSilicoRandom	4	174657034	1190	LINE(L2)chr4:174655744	-	D
in silico	InSilicoRandom	InSilicoRandom	4	190422285	-7	SINE(Alu)chr4:190422291	+	B
in silico	InSilicoRandom	InSilicoRandom	4	169711416	0	SINE(Alu)chr4:169711305	-	A
in silico	InSilicoRandom	InSilicoRandom	4	35732857	-213	LINE(L2)chr4:35733069	+	D
in silico	InSilicoRandom	InSilicoRandom	4	120108635	-533	SINE(Alu)chr4:120109167	+	D
in silico	InSilicoRandom	InSilicoRandom	4	140150121	0	SINE(Alu)chr4:140149820	+	A
in silico	InSilicoRandom	InSilicoRandom	4	142415872	0	LTR(ERVL)chr4:142415544	+	A
in silico	InSilicoRandom	InSilicoRandom	4	84814880	73	LTR(ERVL-MaLR)chr4:84814765	-	C
in silico	InSilicoRandom	InSilicoRandom	4	161036570	0	LTR(ERVL)chr4:161034545	+	A
in silico	InSilicoRandom	InSilicoRandom	4	35952113	0	LTR(ERVL-MaLR)chr4:35951944	-	A
in silico	InSilicoRandom	InSilicoRandom	4	130109072	0	LINE(L1)chr4:130108482	-	A
in silico	InSilicoRandom	InSilicoRandom	4	25922426	0	DNA(TcMar-Tigger)chr4:25921929	+	A
in silico	InSilicoRandom	InSilicoRandom	4	9720751	0	SINE(Alu)chr4:9720465	-	A
in silico	InSilicoRandom	InSilicoRandom	4	118055647	0	LTR(ERVL-MaLR)chr4:118055647	-	A
in silico	InSilicoRandom	InSilicoRandom	4	62938298	-2602	SINE(Alu)chr4:62940900	-	D
in silico	InSilicoRandom	InSilicoRandom	4	14506811	0	LINE(L1)chr4:14503283	-	A
in silico	InSilicoRandom	InSilicoRandom	4	15155234	29	SINE(MIR)chr4:15155106	-	C
in silico	InSilicoRandom	InSilicoRandom	4	142028192	84	SINE(MIR)chr4:142028026	+	C
in silico	InSilicoRandom	InSilicoRandom	4	137314091	-813	DNA(hAT-Charlie)chr4:137314904	-	D
in silico	InSilicoRandom	InSilicoRandom	4	140833221	0	LINE(L1)chr4:140833085	-	A
in silico	InSilicoRandom	InSilicoRandom	4	83833631	619	LINE(L2)chr4:83832867	-	D
in silico	InSilicoRandom	InSilicoRandom	4	106935869	0	LINE(L2)chr4:106935784	-	A
in silico	InSilicoRandom	InSilicoRandom	4	182000037	-561	SINE(MIR)chr4:182000598	-	D
in silico	InSilicoRandom	InSilicoRandom	4	42712219	331	LTR(Gypsy)chr4:42711832	+	D
in silico	InSilicoRandom	InSilicoRandom	4	25286139	0	LINE(L1)chr4:25286110	-	A
in silico	InSilicoRandom	InSilicoRandom	4	22712498	-579	SINE(MIR)chr4:22713077	-	D
in silico	InSilicoRandom	InSilicoRandom	4	37094598	0	LINE(L1)chr4:37094447	-	A
in silico	InSilicoRandom	InSilicoRandom	4	175872208	0	LTR(ERVL-MaLR)chr4:175871853	+	A
in silico	InSilicoRandom	InSilicoRandom	4	114069188	-600	LINE(L2)chr4:114069788	-	D
in silico	InSilicoRandom	InSilicoRandom	4	181628032	0	LINE(L1)chr4:181627666	-	A
in silico	InSilicoRandom	InSilicoRandom	4	64267451	-171	Simple_repeat(Simple_repeat)chr4:64267621	+	D
in silico	InSilicoRandom	InSilicoRandom	4	90592811	0	LINE(L1)chr4:90592284	+	A
in silico	InSilicoRandom	InSilicoRandom	4	33824338	0	SINE(Alu)chr4:33824255	+	A
in silico	InSilicoRandom	InSilicoRandom	6	32602687	-39	LTR(ERV1)chr6:32602726	-	C
in silico	InSilicoRandom	InSilicoRandom	6	17414457	-37	LINE(L1)chr6:17414494	-	C
in silico	InSilicoRandom	InSilicoRandom	6	118265834	48	Simple_repeat(Simple_repeat)chr6:118265739	+	C
in silico	InSilicoRandom	InSilicoRandom	6	103919126	-98	LTR(ERVL-MaLR)chr6:103919224	-	C
in silico	InSilicoRandom	InSilicoRandom	6	146979947	0	LTR(Gypsy)chr6:146979763	-	A
in silico	InSilicoRandom	InSilicoRandom	6	79646904	2311	SINE(MIR)chr6:79644429	-	D
in silico	InSilicoRandom	InSilicoRandom	6	158469607	0	DNA(hAT-Charlie)chr6:158469542	+	A
in silico	InSilicoRandom	InSilicoRandom	6	30451163	0	LTR(ERVL-MaLR)chr6:30450890	-	A
in silico	InSilicoRandom	InSilicoRandom	6	149447244	0	LINE(L1)chr6:149447138	+	A
in silico	InSilicoRandom	InSilicoRandom	6	121445758	0	LINE(L1)chr6:121444444	-	A
in silico	InSilicoRandom	InSilicoRandom	6	133689510	358	SINE(MIR)chr6:133689108	-	D
in silico	InSilicoRandom	InSilicoRandom	6	110036104	455	LINE(L1)chr6:110032623	-	D
in silico	InSilicoRandom	InSilicoRandom	6	161405895	0	LTR(ERVL-MaLR)chr6:161405696	+	A
in silico	InSilicoRandom	InSilicoRandom	6	95249198	0	LINE(L1)chr6:95248737	+	A
in silico	InSilicoRandom	InSilicoRandom	6	99242386	-300	SINE(MIR)chr6:99242685	+	D
in silico	InSilicoRandom	InSilicoRandom	6	167070924	-449	SINE(Alu)chr6:167071373	-	D
in silico	InSilicoRandom	InSilicoRandom	6	145040751	-6	LINE(L2)chr6:145040757	-	B
in silico	InSilicoRandom	InSilicoRandom	6	2446288	-20	SINE(Alu)chr6:2446307	+	C
in silico	InSilicoRandom	InSilicoRandom	6	97284629	-667	Simple_repeat(Simple_repeat)chr6:97285295	+	D
in silico	InSilicoRandom	InSilicoRandom	6	42433584	0	SINE(Alu)chr6:42433446	-	A
in silico	InSilicoRandom	InSilicoRandom	6	141426104	0	LINE(L1)chr6:141425222	+	A
in silico	InSilicoRandom	InSilicoRandom	6	68150695	0	LINE(L1)chr6:68150400	+	A
in silico	InSilicoRandom	InSilicoRandom	6	64916663	-23	LTR(ERVL-MaLR)chr6:64916685	+	C
in silico	InSilicoRandom	InSilicoRandom	6	89602055	0	SINE(MIR)chr6:89601884	-	A
in silico	InSilicoRandom	InSilicoRandom	6	151657382	0	LINE(L1)chr6:151656909	-	A
in silico	InSilicoRandom	InSilicoRandom	6	161422941	81	SINE(MIR)chr6:161422704	+	C
in silico	InSilicoRandom	InSilicoRandom	6	140805678	1321	SINE(Alu)chr6:140804067	-	D
in silico	InSilicoRandom	InSilicoRandom	6	48754385	0	LINE(L1)chr6:48754125	+	A
in silico	InSilicoRandom	InSilicoRandom	6	149033833	0	LINE(L1)chr6:149033754	-	A
in silico	InSilicoRandom	InSilicoRandom	6	72996177	262	SINE(Alu)chr6:72995620	+	D
in silico	InSilicoRandom	InSilicoRandom	6	150179164	0	SINE(MIR)chr6:150179056	-	A
in silico	InSilicoRandom	InSilicoRandom	6	12755071	0	DNA(TcMar-Tigger)chr6:12754907	+	A
in silico	InSilicoRandom	InSilicoRandom	6	63928851	969	LTR(ERVL-MaLR)chr6:63927722	-	D
in silico	InSilicoRandom	InSilicoRandom	6	53953593	0	DNA(hAT-Charlie)chr6:53953475	+	A
in silico	InSilicoRandom	InSilicoRandom	6	128039055	550	SINE(MIR)chr6:128038295	-	D
in silico	InSilicoRandom	InSilicoRandom	6	91800830	-162	SINE(MIR)chr6:91800992	-	D
in silico	InSilicoRandom	InSilicoRandom	6	17136213	0	LINE(L1)chr6:17132987	+	A
in silico	InSilicoRandom	InSilicoRandom	6	50822194	-790	SINE(Alu)chr6:50822983	+	D
in silico	InSilicoRandom	InSilicoRandom	6	103144221	0	LINE(L1)chr6:103142394	-	A
in silico	InSilicoRandom	InSilicoRandom	6	125093269	-58	LINE(L2)chr6:125093327	-	C
in silico	InSilicoRandom	InSilicoRandom	6	102240470	0	LINE(L1)chr6:102236084	-	A
in silico	InSilicoRandom	InSilicoRandom	6	114050212	86	LINE(L2)chr6:114050061	+	C
in silico	InSilicoRandom	InSilicoRandom	6	119326351	-318	SINE(MIR)chr6:119326669	-	D
in silico	InSilicoRandom	InSilicoRandom	6	14680345	0	DNA(hAT-Blackjack)chr6:14679783	-	A
in silico	InSilicoRandom	InSilicoRandom	6	20435907	0	SINE(Alu)chr6:20435701	+	A
in silico	InSilicoRandom	InSilicoRandom	6	37593641	-71	LINE(CR1)chr6:37593711	+	C
in silico	InSilicoRandom	InSilicoRandom	6	118730796	0	SINE(Alu)chr6:118730729	+	A
in silico	InSilicoRandom	InSilicoRandom	6	94747846	0	DNA(hAT-Charlie)chr6:94747826	-	A
in silico	InSilicoRandom	InSilicoRandom	6	98603035	0	LINE(L1)chr6:98599315	-	A
in silico	InSilicoRandom	InSilicoRandom	6	148174412	-735	DNA(hAT-Charlie)chr6:148175147	-	D
in silico	InSilicoRandom	InSilicoRandom	6	19414957	0	LTR(ERVL-MaLR)chr6:19414876	-	A
in silico	InSilicoRandom	InSilicoRandom	6	4296524	0	DNA(TcMar-Tigger)chr6:4296256	+	A
in silico	InSilicoRandom	InSilicoRandom	6	63035401	-66	LINE(L2)chr6:63035467	-	C
in silico	InSilicoRandom	InSilicoRandom	6	156768374	-364	LINE(L1)chr6:156768737	+	D
in silico	InSilicoRandom	InSilicoRandom	6	20346346	40	LINE(L2)chr6:20346194	-	C
in silico	InSilicoRandom	InSilicoRandom	6	95923611	0	LINE(L1)chr6:95919312	+	A
in silico	InSilicoRandom	InSilicoRandom	6	170266086	414	LTR(ERVL)chr6:170265268	-	D
in silico	InSilicoRandom	InSilicoRandom	6	169666698	-1277	LTR(ERVL)chr6:169667975	-	D
in silico	InSilicoRandom	InSilicoRandom	6	14179477	136	Simple_repeat(Simple_repeat)chr6:14179309	+	C
in silico	InSilicoRandom	InSilicoRandom	6	143386592	177	LTR(ERV1)chr6:143385945	-	D
in silico	InSilicoRandom	InSilicoRandom	6	98609916	0	LINE(L1)chr6:98609421	+	A
in silico	InSilicoRandom	InSilicoRandom	6	20916614	11	LINE(L1)chr6:20915899	+	B
in silico	InSilicoRandom	InSilicoRandom	6	117360386	0	LINE(L1)chr6:117359038	-	A
in silico	InSilicoRandom	InSilicoRandom	6	39095271	-495	LINE(L2)chr6:39095765	+	D
in silico	InSilicoRandom	InSilicoRandom	6	144590103	11	SINE(MIR)chr6:144590040	+	B
in silico	InSilicoRandom	InSilicoRandom	6	17411643	0	LINE(L1)chr6:17411210	-	A
in silico	InSilicoRandom	InSilicoRandom	6	117400752	276	SINE(MIR)chr6:117400297	-	D
in silico	InSilicoRandom	InSilicoRandom	6	130800743	0	LINE(L1)chr6:130796660	+	A
in silico	InSilicoRandom	InSilicoRandom	6	92051758	51	LTR(Gypsy)chr6:92051359	-	C
in silico	InSilicoRandom	InSilicoRandom	6	147664646	0	SINE(MIR)chr6:147664557	-	A
in silico	InSilicoRandom	InSilicoRandom	6	9219917	0	LINE(L1)chr6:9217811	+	A
in silico	InSilicoRandom	InSilicoRandom	6	15307710	0	SINE(Alu)chr6:15307495	-	A
in silico	InSilicoRandom	InSilicoRandom	6	53516472	255	Simple_repeat(Simple_repeat)chr6:53516197	+	D
in silico	InSilicoRandom	InSilicoRandom	6	154662828	-240	LTR(ERV1)chr6:154663067	+	D
in silico	InSilicoRandom	InSilicoRandom	6	27659084	0	LINE(L1)chr6:27658811	+	A
in silico	InSilicoRandom	InSilicoRandom	6	130986850	-185	Simple_repeat(Simple_repeat)chr6:130987034	+	D
in silico	InSilicoRandom	InSilicoRandom	6	44227768	54	SINE(MIR)chr6:44227626	-	C
in silico	InSilicoRandom	InSilicoRandom	6	88189458	0	LTR(ERV1)chr6:88188908	-	A
in silico	InSilicoRandom	InSilicoRandom	6	68368701	0	LINE(L1)chr6:68368637	-	A
in silico	InSilicoRandom	InSilicoRandom	6	28085175	0	DNA(hAT-Charlie)chr6:28085145	+	A
in silico	InSilicoRandom	InSilicoRandom	2	11119458	144	LINE(L2)chr2:11119202	-	C
in silico	InSilicoRandom	InSilicoRandom	2	168663224	0	LINE(L1)chr2:168660836	-	A
in silico	InSilicoRandom	InSilicoRandom	2	88700519	0	DNA(TcMar-Tigger)chr2:88700285	+	A
in silico	InSilicoRandom	InSilicoRandom	2	21144639	101	SINE(MIR)chr2:21144367	+	C
in silico	InSilicoRandom	InSilicoRandom	2	76227829	-335	LTR(ERVL-MaLR)chr2:76228164	-	D
in silico	InSilicoRandom	InSilicoRandom	2	101496992	0	LINE(L1)chr2:101496530	+	A
in silico	InSilicoRandom	InSilicoRandom	2	164313772	-798	LINE(RTE-BovB)chr2:164314569	+	D
in silico	InSilicoRandom	InSilicoRandom	2	52147500	0	LTR(ERVL)chr2:52147065	-	A
in silico	InSilicoRandom	InSilicoRandom	2	103829676	0	SINE(MIR)chr2:103829536	+	A
in silico	InSilicoRandom	InSilicoRandom	2	152008562	454	LINE(L2)chr2:152008005	+	D
in silico	InSilicoRandom	InSilicoRandom	2	213150877	-344	SINE(MIR)chr2:213151220	+	D
in silico	InSilicoRandom	InSilicoRandom	2	27124993	-496	LTR(ERV1)chr2:27125488	+	D
in silico	InSilicoRandom	InSilicoRandom	2	147181031	0	LINE(L1)chr2:147180667	+	A
in silico	InSilicoRandom	InSilicoRandom	2	115934569	115	SINE(MIR)chr2:115934247	-	C
in silico	InSilicoRandom	InSilicoRandom	2	108487591	522	Simple_repeat(Simple_repeat)chr2:108487034	+	D
in silico	InSilicoRandom	InSilicoRandom	2	52292390	162	SINE(Alu)chr2:52291942	+	D
in silico	InSilicoRandom	InSilicoRandom	2	23807619	0	SINE(Alu)chr2:23807594	-	A
in silico	InSilicoRandom	InSilicoRandom	2	81803835	210	LINE(L2)chr2:81803346	-	D
in silico	InSilicoRandom	InSilicoRandom	2	135066770	0	LINE(L1)chr2:135066454	-	A
in silico	InSilicoRandom	InSilicoRandom	2	206095539	0	LINE(L1)chr2:206091639	-	A
in silico	InSilicoRandom	InSilicoRandom	2	36908398	0	LINE(L1)chr2:36907659	-	A
in silico	InSilicoRandom	InSilicoRandom	2	232122441	0	SINE(MIR)chr2:232122301	+	A
in silico	InSilicoRandom	InSilicoRandom	2	17890731	-118	LINE(L2)chr2:17890849	-	C
in silico	InSilicoRandom	InSilicoRandom	2	106904177	0	SINE(Alu)chr2:106904076	+	A
in silico	InSilicoRandom	InSilicoRandom	2	203293116	-1	SINE(Alu)chr2:203293117	-	B
in silico	InSilicoRandom	InSilicoRandom	2	125463653	-389	SINE(Alu)chr2:125464041	+	D
in silico	InSilicoRandom	InSilicoRandom	2	234267562	0	LINE(L1)chr2:234267100	-	A
in silico	InSilicoRandom	InSilicoRandom	2	155263363	0	LINE(L2)chr2:155262613	+	A
in silico	InSilicoRandom	InSilicoRandom	2	9800102	0	LTR(ERVL)chr2:9800018	+	A
in silico	InSilicoRandom	InSilicoRandom	2	8191404	85	LTR(ERVL-MaLR)chr2:8190941	+	C
in silico	InSilicoRandom	InSilicoRandom	2	112762568	-76	SINE(Alu)chr2:112762644	-	C
in silico	InSilicoRandom	InSilicoRandom	2	161551923	0	LINE(L2)chr2:161551775	-	A
in silico	InSilicoRandom	InSilicoRandom	2	204442595	161	SINE(Alu)chr2:204442332	-	D
in silico	InSilicoRandom	InSilicoRandom	2	240294974	0	LINE(L1)chr2:240294670	-	A
in silico	InSilicoRandom	InSilicoRandom	2	155726509	0	LTR(ERV1)chr2:155724238	+	A
in silico	InSilicoRandom	InSilicoRandom	2	125667557	122	Simple_repeat(Simple_repeat)chr2:125667403	+	C
in silico	InSilicoRandom	InSilicoRandom	2	137874179	-2136	LTR(ERVL-MaLR)chr2:137876315	-	D
in silico	InSilicoRandom	InSilicoRandom	2	147019050	0	SINE(Alu)chr2:147018884	-	A
in silico	InSilicoRandom	InSilicoRandom	2	20142165	197	LINE(L1)chr2:20141653	-	D
in silico	InSilicoRandom	InSilicoRandom	2	208883184	0	LINE(L2)chr2:208883125	+	A
in silico	InSilicoRandom	InSilicoRandom	2	138363562	0	SINE(Alu)chr2:138363536	-	A
in silico	InSilicoRandom	InSilicoRandom	2	87615022	254	LINE(L1)chr2:87614757	+	D
in silico	InSilicoRandom	InSilicoRandom	2	185921664	0	LINE(L1)chr2:185921550	+	A
in silico	InSilicoRandom	InSilicoRandom	2	136951172	0	LTR(ERV1)chr2:136950743	+	A
in silico	InSilicoRandom	InSilicoRandom	2	139502889	0	LINE(L1)chr2:139502834	-	A
in silico	InSilicoRandom	InSilicoRandom	2	130281665	0	LINE(L1)chr2:130281340	-	A
in silico	InSilicoRandom	InSilicoRandom	2	8293436	0	LTR(ERVL)chr2:8293003	-	A
in silico	InSilicoRandom	InSilicoRandom	2	158865968	-1301	SINE(Alu)chr2:158867269	-	D
in silico	InSilicoRandom	InSilicoRandom	2	16652410	238	LINE(L1)chr2:16651336	+	D
in silico	InSilicoRandom	InSilicoRandom	2	99338363	0	LINE(L1)chr2:99337141	+	A
in silico	InSilicoRandom	InSilicoRandom	2	180707238	-257	LINE(L2)chr2:180707494	+	D
in silico	InSilicoRandom	InSilicoRandom	2	95841122	-35	LTR(ERVL-MaLR)chr2:95841157	-	C
in silico	InSilicoRandom	InSilicoRandom	2	32485167	0	SINE(Alu)chr2:32485015	+	A
in silico	InSilicoRandom	InSilicoRandom	2	213735377	-279	LTR(ERVL-MaLR)chr2:213735655	+	D
in silico	InSilicoRandom	InSilicoRandom	2	47513008	0	LINE(L1)chr2:47512627	-	A
in silico	InSilicoRandom	InSilicoRandom	2	234325847	0	SINE(Alu)chr2:234325676	-	A
in silico	InSilicoRandom	InSilicoRandom	2	193253598	0	SINE(Alu)chr2:193253524	-	A
in silico	InSilicoRandom	InSilicoRandom	2	41351549	100	LTR(ERVL)chr2:41351238	+	C
in silico	InSilicoRandom	InSilicoRandom	2	228336561	0	LINE(L2)chr2:228336440	-	A
in silico	InSilicoRandom	InSilicoRandom	2	49922383	0	SINE(MIR)chr2:49922371	+	A
in silico	InSilicoRandom	InSilicoRandom	2	84562243	0	LINE(L1)chr2:84561846	+	A
in silico	InSilicoRandom	InSilicoRandom	2	38126884	23	SINE(Alu)chr2:38126580	-	C
in silico	InSilicoRandom	InSilicoRandom	2	15959593	-58	LINE(L2)chr2:15959650	+	C
in silico	InSilicoRandom	InSilicoRandom	2	234268833	-77	SINE(Alu)chr2:234268910	-	C
in silico	InSilicoRandom	InSilicoRandom	2	55932031	0	LINE(L2)chr2:55931720	-	A
in silico	InSilicoRandom	InSilicoRandom	2	31851301	0	LINE(L1)chr2:31849437	-	A
in silico	InSilicoRandom	InSilicoRandom	2	26511681	89	SINE(Alu)chr2:26511295	+	C
in silico	InSilicoRandom	InSilicoRandom	2	126214922	-313	LINE(L2)chr2:126215234	+	D
in silico	InSilicoRandom	InSilicoRandom	2	34167936	95	SINE(MIR)chr2:34167681	+	C
in silico	InSilicoRandom	InSilicoRandom	2	338940	0	LTR(ERVL-MaLR)chr2:338709	+	A
in silico	InSilicoRandom	InSilicoRandom	2	130072389	0	LTR(ERVL)chr2:130072080	-	A
in silico	InSilicoRandom	InSilicoRandom	2	184715117	0	LINE(L1)chr2:184714250	+	A
in silico	InSilicoRandom	InSilicoRandom	2	8580344	0	LTR(ERVL)chr2:8579583	+	A
in silico	InSilicoRandom	InSilicoRandom	2	85089432	735	DNA(hAT-Charlie)chr2:85088264	-	D
in silico	InSilicoRandom	InSilicoRandom	2	240168220	799	LINE(L1)chr2:240167063	+	D
in silico	InSilicoRandom	InSilicoRandom	2	20755222	0	DNA(hAT-Tip100)chr2:20755080	-	A
in silico	InSilicoRandom	InSilicoRandom	2	129287968	-238	SINE(MIR)chr2:129288206	-	D
in silico	InSilicoRandom	InSilicoRandom	2	137291145	-296	LINE(L1)chr2:137291440	+	D
in silico	InSilicoRandom	InSilicoRandom	2	162815786	-55	LTR(ERVL-MaLR)chr2:162815841	-	C
in silico	InSilicoRandom	InSilicoRandom	2	201115724	0	LINE(L1)chr2:201115358	+	A
in silico	InSilicoRandom	InSilicoRandom	19	40482870	0	SINE(Alu)chr19:40482753	-	A
in silico	InSilicoRandom	InSilicoRandom	19	44319805	-8	Simple_repeat(Simple_repeat)chr19:44319812	+	B
in silico	InSilicoRandom	InSilicoRandom	19	38227414	0	LTR(ERVL)chr19:38227377	-	A
in silico	InSilicoRandom	InSilicoRandom	19	41130033	-183	SINE(MIR)chr19:41130215	+	D
in silico	InSilicoRandom	InSilicoRandom	19	14325411	0	Simple_repeat(Simple_repeat)chr19:14325391	+	A
in silico	InSilicoRandom	InSilicoRandom	19	36031167	87	SINE(MIR)chr19:36030912	+	C
in silico	InSilicoRandom	InSilicoRandom	19	4958230	-26	SINE(MIR)chr19:4958255	+	C
in silico	InSilicoRandom	InSilicoRandom	19	34859547	-398	SINE(Alu)chr19:34859945	-	D
in silico	InSilicoRandom	InSilicoRandom	19	10553447	0	Simple_repeat(Simple_repeat)chr19:10553342	+	A
in silico	InSilicoRandom	InSilicoRandom	19	1235993	-48	Simple_repeat(Simple_repeat)chr19:1236040	+	C
in silico	InSilicoRandom	InSilicoRandom	19	33929530	-105	SINE(Alu)chr19:33929635	-	C
in silico	InSilicoRandom	InSilicoRandom	19	54282949	0	SINE(Alu)chr19:54282874	+	A
in silico	InSilicoRandom	InSilicoRandom	19	21865260	0	LINE(L1)chr19:21864185	+	A
in silico	InSilicoRandom	InSilicoRandom	19	4741902	0	SINE(Alu)chr19:4741698	-	A
in silico	InSilicoRandom	InSilicoRandom	19	32412058	11	SINE(MIR)chr19:32412029	-	B
in silico	InSilicoRandom	InSilicoRandom	19	50235499	31	LINE(L2)chr19:50235350	+	C
in silico	InSilicoRandom	InSilicoRandom	19	54897479	0	LINE(L1)chr19:54897445	+	A
in silico	InSilicoRandom	InSilicoRandom	19	38279439	0	SINE(Alu)chr19:38279338	+	A
in silico	InSilicoRandom	InSilicoRandom	19	37072495	0	LTR(ERVL-MaLR)chr19:37072411	+	A
in silico	InSilicoRandom	InSilicoRandom	19	54151044	302	SINE(Alu)chr19:54150453	+	D
in silico	InSilicoRandom	InSilicoRandom	19	50228288	0	SINE(Alu)chr19:50228250	-	A
in silico	InSilicoRandom	InSilicoRandom	19	53819665	-449	SINE(Alu)chr19:53820113	+	D
in silico	InSilicoRandom	InSilicoRandom	19	36178913	0	SINE(Alu)chr19:36178649	+	A
in silico	InSilicoRandom	InSilicoRandom	19	53565759	0	SINE(Alu)chr19:53565665	-	A
in silico	InSilicoRandom	InSilicoRandom	19	56061760	-121	SINE(MIR)chr19:56061880	+	C
in silico	InSilicoRandom	InSilicoRandom	19	169247	0	LTR(ERVL-MaLR)chr19:169077	+	A
in silico	InSilicoRandom	InSilicoRandom	19	37339355	52	LTR(ERVL)chr19:37339001	+	C
in silico	InSilicoRandom	InSilicoRandom	19	22218148	-557	Simple_repeat(Simple_repeat)chr19:22218704	+	D
in silico	InSilicoRandom	InSilicoRandom	19	3600260	496	SINE(Alu)chr19:3599627	-	D
in silico	InSilicoRandom	InSilicoRandom	19	15477582	0	SINE(Alu)chr19:15477428	-	A
in silico	InSilicoRandom	InSilicoRandom	19	32067839	-999	LTR(ERVL-MaLR)chr19:32068837	+	D
in silico	InSilicoRandom	InSilicoRandom	19	6736232	0	SINE(Alu)chr19:6736097	-	A
in silico	InSilicoRandom	InSilicoRandom	19	17344275	-41	SINE(Alu)chr19:17344316	-	C
in silico	InSilicoRandom	InSilicoRandom	19	33109472	101	SINE(Alu)chr19:33109225	+	C
in silico	InSilicoRandom	InSilicoRandom	19	53343593	941	SINE(Alu)chr19:53342555	-	D
in silico	InSilicoRandom	InSilicoRandom	19	47973709	64	Simple_repeat(Simple_repeat)chr19:47973602	+	C
in silico	InSilicoRandom	InSilicoRandom	19	47083812	0	SINE(MIR)chr19:47083565	-	A
in silico	InSilicoRandom	InSilicoRandom	19	54084908	419	LTR(ERV1)chr19:54084097	-	D
in silico	InSilicoRandom	InSilicoRandom	19	12705918	-32	SINE(Alu)chr19:12705950	-	C
in silico	InSilicoRandom	InSilicoRandom	19	57214519	0	LINE(L1)chr19:57214168	-	A
in silico	InSilicoRandom	InSilicoRandom	17	71257697	0	SINE(Alu)chr17:71257518	+	A
in silico	InSilicoRandom	InSilicoRandom	17	4257116	0	SINE(Alu)chr17:4257107	-	A
in silico	InSilicoRandom	InSilicoRandom	17	80354177	466	SINE(Alu)chr17:80353415	+	D
in silico	InSilicoRandom	InSilicoRandom	17	34763573	0	DNA(hAT-Charlie)chr17:34763539	-	A
in silico	InSilicoRandom	InSilicoRandom	17	20655667	0	SINE(Alu)chr17:20655643	-	A
in silico	InSilicoRandom	InSilicoRandom	17	43119720	5	SINE(Alu)chr17:43119675	-	B
in silico	InSilicoRandom	InSilicoRandom	17	43811139	0	SINE(MIR)chr17:43811120	-	A
in silico	InSilicoRandom	InSilicoRandom	17	11791950	351	SINE(Alu)chr17:11791298	-	D
in silico	InSilicoRandom	InSilicoRandom	17	70577073	-401	LINE(L2)chr17:70577474	-	D
in silico	InSilicoRandom	InSilicoRandom	17	1779274	-294	SINE(Alu)chr17:1779567	+	D
in silico	InSilicoRandom	InSilicoRandom	17	8403261	0	SINE(MIR)chr17:8403223	+	A
in silico	InSilicoRandom	InSilicoRandom	17	6559628	-14	SINE(MIR)chr17:6559641	+	B
in silico	InSilicoRandom	InSilicoRandom	17	54013402	-15	SINE(Alu)chr17:54013417	-	B
in silico	InSilicoRandom	InSilicoRandom	17	78332741	22	SINE(Alu)chr17:78332428	+	C
in silico	InSilicoRandom	InSilicoRandom	17	7690381	-390	SINE(Alu)chr17:7690770	+	D
in silico	InSilicoRandom	InSilicoRandom	17	69228499	0	SINE(Alu)chr17:69228276	-	A
in silico	InSilicoRandom	InSilicoRandom	17	40241615	248	SINE(Alu)chr17:40241145	+	D
in silico	InSilicoRandom	InSilicoRandom	17	13874072	0	LTR(ERV1)chr17:13873910	+	A
in silico	InSilicoRandom	InSilicoRandom	17	75608395	344	SINE(MIR)chr17:75607969	+	D
in silico	InSilicoRandom	InSilicoRandom	17	32025447	0	SINE(MIR)chr17:32025311	+	A
in silico	InSilicoRandom	InSilicoRandom	17	30439432	-361	SINE(Alu)chr17:30439793	-	D
in silico	InSilicoRandom	InSilicoRandom	17	61057927	0	LINE(L2)chr17:61057923	+	A
in silico	InSilicoRandom	InSilicoRandom	17	15535382	-39	SINE(Alu)chr17:15535420	+	C
in silico	InSilicoRandom	InSilicoRandom	17	62335504	0	SINE(Alu)chr17:62335273	-	A
in silico	InSilicoRandom	InSilicoRandom	17	6190492	17	SINE(MIR)chr17:6190226	+	C
in silico	InSilicoRandom	InSilicoRandom	17	4871031	1292	SINE(MIR)chr17:4869625	+	D
in silico	InSilicoRandom	InSilicoRandom	17	55152884	0	LINE(L2)chr17:55152795	+	A
in silico	InSilicoRandom	InSilicoRandom	17	47671189	0	SINE(Alu)chr17:47670964	-	A
in silico	InSilicoRandom	InSilicoRandom	17	5777495	561	LTR(Gypsy)chr17:5776442	-	D
in silico	InSilicoRandom	InSilicoRandom	17	4153973	0	SINE(Alu)chr17:4153967	-	A
in silico	InSilicoRandom	InSilicoRandom	17	12425226	-38	DNA(hAT-Charlie)chr17:12425264	-	C
in silico	InSilicoRandom	InSilicoRandom	17	56929188	0	LINE(L1)chr17:56923631	-	A
in silico	InSilicoRandom	InSilicoRandom	17	13805035	23	SINE(Alu)chr17:13804711	+	C
in silico	InSilicoRandom	InSilicoRandom	17	8236873	0	LTR(Gypsy)chr17:8236717	-	A
in silico	InSilicoRandom	InSilicoRandom	17	15561298	260	LINE(L1)chr17:15560715	-	D
in silico	InSilicoRandom	InSilicoRandom	17	59575293	0	SINE(Alu)chr17:59575212	+	A
in silico	InSilicoRandom	InSilicoRandom	17	32853676	0	SINE(MIR)chr17:32853602	-	A
in silico	InSilicoRandom	InSilicoRandom	17	21860880	0	SINE(Alu)chr17:21860611	+	A
in silico	InSilicoRandom	InSilicoRandom	17	54880377	0	DNA(hAT-Charlie)chr17:54880199	+	A
in silico	InSilicoRandom	InSilicoRandom	17	42204794	0	SINE(Alu)chr17:42204783	-	A
in silico	InSilicoRandom	InSilicoRandom	1	100410822	0	LTR(ERV1)chr1:100410608	-	A
in silico	InSilicoRandom	InSilicoRandom	1	208119847	0	DNA(hAT-Charlie)chr1:208119678	-	A
in silico	InSilicoRandom	InSilicoRandom	1	157819476	16	LTR(ERV1)chr1:157819297	+	C
in silico	InSilicoRandom	InSilicoRandom	1	31252647	-66	SINE(MIR)chr1:31252712	+	C
in silico	InSilicoRandom	InSilicoRandom	1	170541015	0	LINE(L1)chr1:170538020	+	A
in silico	InSilicoRandom	InSilicoRandom	1	86165977	0	SINE(MIR)chr1:86165877	-	A
in silico	InSilicoRandom	InSilicoRandom	1	19691214	0	LINE(CR1)chr1:19690826	-	A
in silico	InSilicoRandom	InSilicoRandom	1	210418485	2025	Simple_repeat(Simple_repeat)chr1:210416438	+	D
in silico	InSilicoRandom	InSilicoRandom	1	150609470	0	LINE(L2)chr1:150608829	-	A
in silico	InSilicoRandom	InSilicoRandom	1	166602108	-71	LTR(ERVL-MaLR)chr1:166602178	+	C
in silico	InSilicoRandom	InSilicoRandom	1	58053826	-187	DNA(DNA)chr1:58054013	-	D
in silico	InSilicoRandom	InSilicoRandom	1	70320836	-40	LINE(L1)chr1:70320876	-	C
in silico	InSilicoRandom	InSilicoRandom	1	147545329	0	LINE(L1)chr1:147545110	-	A
in silico	InSilicoRandom	InSilicoRandom	1	79023226	0	LINE(L1)chr1:79019716	+	A
in silico	InSilicoRandom	InSilicoRandom	1	58227153	19	DNA(hAT-Charlie)chr1:58227035	+	C
in silico	InSilicoRandom	InSilicoRandom	1	93190072	0	LINE(L1)chr1:93189973	+	A
in silico	InSilicoRandom	InSilicoRandom	1	115060795	0	SINE(Alu)chr1:115060688	+	A
in silico	InSilicoRandom	InSilicoRandom	1	209520706	42	SINE(MIR)chr1:209520412	+	C
in silico	InSilicoRandom	InSilicoRandom	1	182046117	0	LINE(L1)chr1:182045517	+	A
in silico	InSilicoRandom	InSilicoRandom	1	32849733	-200	SINE(MIR)chr1:32849932	+	D
in silico	InSilicoRandom	InSilicoRandom	1	93872243	0	LINE(L1)chr1:93867514	-	A
in silico	InSilicoRandom	InSilicoRandom	1	234030346	-126	LINE(L1)chr1:234030471	+	C
in silico	InSilicoRandom	InSilicoRandom	1	203410614	-669	SINE(MIR)chr1:203411283	-	D
in silico	InSilicoRandom	InSilicoRandom	1	224092503	0	DNA(hAT-Charlie)chr1:224092491	-	A
in silico	InSilicoRandom	InSilicoRandom	1	230459928	-238	LINE(L2)chr1:230460165	+	D
in silico	InSilicoRandom	InSilicoRandom	1	48739269	0	LINE(L1)chr1:48739020	-	A
in silico	InSilicoRandom	InSilicoRandom	1	236214524	-23	Simple_repeat(Simple_repeat)chr1:236214546	+	C
in silico	InSilicoRandom	InSilicoRandom	1	104245424	0	LTR(ERV1)chr1:104242549	+	A
in silico	InSilicoRandom	InSilicoRandom	1	116352711	198	LTR(ERVL)chr1:116352009	+	D
in silico	InSilicoRandom	InSilicoRandom	1	79628293	62	LINE(L2)chr1:79628005	+	C
in silico	InSilicoRandom	InSilicoRandom	1	182170882	49	SINE(Alu)chr1:182170532	+	C
in silico	InSilicoRandom	InSilicoRandom	1	75687233	-168	SINE(MIR)chr1:75687401	-	D
in silico	InSilicoRandom	InSilicoRandom	1	244752819	0	DNA(hAT-Charlie)chr1:244752814	+	A
in silico	InSilicoRandom	InSilicoRandom	1	51285517	-22	Simple_repeat(Simple_repeat)chr1:51285538	+	C
in silico	InSilicoRandom	InSilicoRandom	1	62683739	0	LINE(L1)chr1:62683680	-	A
in silico	InSilicoRandom	InSilicoRandom	1	36611979	0	SINE(Alu)chr1:36611895	-	A
in silico	InSilicoRandom	InSilicoRandom	1	195316274	0	LINE(L1)chr1:195314668	+	A
in silico	InSilicoRandom	InSilicoRandom	1	59859139	-734	DNA(hAT-Tip100)chr1:59859872	+	D
in silico	InSilicoRandom	InSilicoRandom	1	95966425	0	LINE(L2)chr1:95966336	+	A
in silico	InSilicoRandom	InSilicoRandom	1	108291295	880	SINE(MIR)chr1:108290303	-	D
in silico	InSilicoRandom	InSilicoRandom	6	162248479	-56	SINE(Alu)chr6:162248535	-	C
in silico	InSilicoRandom	InSilicoRandom	6	34223668	0	SINE(Alu)chr6:34223403	+	A
in silico	InSilicoRandom	InSilicoRandom	6	145504886	0	LINE(L1)chr6:145504600	+	A
in silico	InSilicoRandom	InSilicoRandom	6	162838731	-235	LINE(L1)chr6:162838965	+	D
in silico	InSilicoRandom	InSilicoRandom	6	96600106	0	LINE(L2)chr6:96600105	+	A
in silico	InSilicoRandom	InSilicoRandom	6	149457419	-100	Simple_repeat(Simple_repeat)chr6:149457518	+	C
in silico	InSilicoRandom	InSilicoRandom	6	9119451	1059	SINE(MIR)chr6:9118317	-	D
in silico	InSilicoRandom	InSilicoRandom	6	109795882	0	SINE(Alu)chr6:109795653	+	A
in silico	InSilicoRandom	InSilicoRandom	6	112259371	0	LINE(L2)chr6:112259057	+	A
in silico	InSilicoRandom	InSilicoRandom	6	41100847	-191	LINE(L1)chr6:41101038	-	D
in silico	InSilicoRandom	InSilicoRandom	6	117903288	0	LINE(L1)chr6:117902527	-	A
in silico	InSilicoRandom	InSilicoRandom	6	120262069	0	LINE(L1)chr6:120259012	-	A
in silico	InSilicoRandom	InSilicoRandom	6	146927744	0	LINE(L1)chr6:146926964	-	A
in silico	InSilicoRandom	InSilicoRandom	6	140620516	0	SINE(Alu)chr6:140620325	-	A
in silico	InSilicoRandom	InSilicoRandom	6	115570001	0	LINE(L1)chr6:115566832	+	A
in silico	InSilicoRandom	InSilicoRandom	6	141106864	-28	Simple_repeat(Simple_repeat)chr6:141106891	+	C
in silico	InSilicoRandom	InSilicoRandom	6	29066843	0	LINE(L1)chr6:29066734	+	A
in silico	InSilicoRandom	InSilicoRandom	6	151436573	108	Simple_repeat(Simple_repeat)chr6:151436426	+	C
in silico	InSilicoRandom	InSilicoRandom	6	98001656	-21	DNA(hAT-Blackjack)chr6:98001677	-	C
in silico	InSilicoRandom	InSilicoRandom	6	103776427	-6	Simple_repeat(Simple_repeat)chr6:103776432	+	B
in silico	InSilicoRandom	InSilicoRandom	6	74782204	50	LINE(L1)chr6:74782120	+	C
in silico	InSilicoRandom	InSilicoRandom	6	140101712	-155	SINE(MIR)chr6:140101867	-	D
in silico	InSilicoRandom	InSilicoRandom	6	50364616	829	SINE(MIR)chr6:50363601	+	D
in silico	InSilicoRandom	InSilicoRandom	6	67917244	0	LINE(L1)chr6:67914332	+	A
in silico	InSilicoRandom	InSilicoRandom	6	118243422	-198	LINE(L2)chr6:118243620	-	D
in silico	InSilicoRandom	InSilicoRandom	6	69558856	-800	LINE(L1)chr6:69559656	-	D
in silico	InSilicoRandom	InSilicoRandom	6	25835823	0	LTR(ERVL)chr6:25835757	-	A
in silico	InSilicoRandom	InSilicoRandom	6	41477570	-142	Simple_repeat(Simple_repeat)chr6:41477711	+	C
in silico	InSilicoRandom	InSilicoRandom	6	120279831	0	LINE(L1)chr6:120278853	+	A
in silico	InSilicoRandom	InSilicoRandom	6	68630162	0	LINE(L1)chr6:68629592	+	A
in silico	InSilicoRandom	InSilicoRandom	6	151712550	-101	Simple_repeat(Simple_repeat)chr6:151712650	+	C
in silico	InSilicoRandom	InSilicoRandom	6	140069681	0	LTR(ERV1)chr6:140068951	-	A
in silico	InSilicoRandom	InSilicoRandom	6	3841940	-1189	LINE(L1)chr6:3843129	-	D
in silico	InSilicoRandom	InSilicoRandom	6	52801735	67	SINE(MIR)chr6:52801555	+	C
in silico	InSilicoRandom	InSilicoRandom	6	27431335	0	LINE(L1)chr6:27431067	+	A
in silico	InSilicoRandom	InSilicoRandom	6	142148368	0	LTR(ERV1)chr6:142148108	-	A
in silico	InSilicoRandom	InSilicoRandom	6	151114883	0	LINE(L1)chr6:151114553	+	A
in silico	InSilicoRandom	InSilicoRandom	6	8045391	0	LTR(ERVL-MaLR)chr6:8044672	+	A
in silico	InSilicoRandom	InSilicoRandom	6	39348995	190	DNA(hAT-Blackjack)chr6:39348379	-	D
in silico	InSilicoRandom	InSilicoRandom	6	165187082	-53	LINE(L2)chr6:165187135	-	C
in silico	InSilicoRandom	InSilicoRandom	1	8680973	-198	DNA(hAT-Blackjack)chr1:8681171	-	D
in silico	InSilicoRandom	InSilicoRandom	1	219838429	-67	Simple_repeat(Simple_repeat)chr1:219838495	+	C
in silico	InSilicoRandom	InSilicoRandom	1	9090535	0	DNA(hAT-Charlie)chr1:9090443	+	A
in silico	InSilicoRandom	InSilicoRandom	1	161257190	0	SINE(Alu)chr1:161257056	+	A
in silico	InSilicoRandom	InSilicoRandom	1	221051012	2434	Simple_repeat(Simple_repeat)chr1:221048550	+	D
in silico	InSilicoRandom	InSilicoRandom	1	157670588	-566	DNA(hAT-Charlie)chr1:157671154	-	D
in silico	InSilicoRandom	InSilicoRandom	1	97669244	50	LINE(L1)chr1:97668999	+	C
in silico	InSilicoRandom	InSilicoRandom	1	246895218	0	LINE(L1)chr1:246895012	-	A
in silico	InSilicoRandom	InSilicoRandom	1	26229683	84	LINE(L1)chr1:26229469	+	C
in silico	InSilicoRandom	InSilicoRandom	1	70091817	0	LINE(L1)chr1:70091790	-	A
in silico	InSilicoRandom	InSilicoRandom	1	99164199	100	DNA(hAT-Blackjack)chr1:99163981	-	C
in silico	InSilicoRandom	InSilicoRandom	1	34184328	0	DNA(hAT-Charlie)chr1:34184166	+	A
in silico	InSilicoRandom	InSilicoRandom	1	78854353	26	SINE(MIR)chr1:78854209	+	C
in silico	InSilicoRandom	InSilicoRandom	1	176386910	-29	LTR(ERVL-MaLR)chr1:176386939	-	C
in silico	InSilicoRandom	InSilicoRandom	1	214839327	78	SINE(MIR)chr1:214839199	+	C
in silico	InSilicoRandom	InSilicoRandom	1	221547933	354	SINE(MIR)chr1:221547391	-	D
in silico	InSilicoRandom	InSilicoRandom	1	225966690	0	LINE(L2)chr1:225966675	-	A
in silico	InSilicoRandom	InSilicoRandom	1	177993370	0	SINE(Alu)chr1:177993177	+	A
in silico	InSilicoRandom	InSilicoRandom	1	163098979	0	LINE(L1)chr1:163098493	+	A
in silico	InSilicoRandom	InSilicoRandom	1	143437565	-1358	LTR(ERVL-MaLR)chr1:143438922	+	D
in silico	InSilicoRandom	InSilicoRandom	1	32390897	-4	LINE(CR1)chr1:32390901	-	B
in silico	InSilicoRandom	InSilicoRandom	1	155405765	0	SINE(Alu)chr1:155405559	+	A
in silico	InSilicoRandom	InSilicoRandom	1	244204660	-70	LINE(L2)chr1:244204730	-	C
in silico	InSilicoRandom	InSilicoRandom	1	12762237	0	SINE(Alu)chr1:12762178	+	A
in silico	InSilicoRandom	InSilicoRandom	1	46268368	0	SINE(MIR)chr1:46268224	+	A
in silico	InSilicoRandom	InSilicoRandom	1	245860231	0	SINE(Alu)chr1:245860129	+	A
in silico	InSilicoRandom	InSilicoRandom	1	173866311	-929	SINE(Alu)chr1:173867240	-	D
in silico	InSilicoRandom	InSilicoRandom	1	10543402	0	SINE(Alu)chr1:10543372	-	A
in silico	InSilicoRandom	InSilicoRandom	1	160485345	0	LINE(L1)chr1:160481494	+	A
in silico	InSilicoRandom	InSilicoRandom	1	199423013	-670	LTR(Gypsy)chr1:199423683	-	D
in silico	InSilicoRandom	InSilicoRandom	1	34084704	243	SINE(MIR)chr1:34084333	-	D
in silico	InSilicoRandom	InSilicoRandom	1	97463256	-762	LTR(ERVL-MaLR)chr1:97464018	-	D
in silico	InSilicoRandom	InSilicoRandom	1	180339613	0	LINE(L2)chr1:180339553	-	A
in silico	InSilicoRandom	InSilicoRandom	1	69163514	-288	LINE(L1)chr1:69163801	+	D
in silico	InSilicoRandom	InSilicoRandom	1	82157299	0	SINE(Alu)chr1:82157175	-	A
in silico	InSilicoRandom	InSilicoRandom	1	224583462	0	DNA(TcMar-Tigger)chr1:224583341	+	A
in silico	InSilicoRandom	InSilicoRandom	1	226634666	0	LTR(ERV1)chr1:226634656	+	A
in silico	InSilicoRandom	InSilicoRandom	1	237023969	-107	LINE(L1)chr1:237024076	-	C
in silico	InSilicoRandom	InSilicoRandom	1	107557047	0	LINE(L1)chr1:107557032	-	A
in silico	InSilicoRandom	InSilicoRandom	1	1181736	-3331	LTR(ERVK)chr1:1185067	-	D
in silico	InSilicoRandom	InSilicoRandom	3	70722461	0	LINE(L2)chr3:70722395	+	A
in silico	InSilicoRandom	InSilicoRandom	3	34924824	1038	Simple_repeat(Simple_repeat)chr3:34923755	+	D
in silico	InSilicoRandom	InSilicoRandom	3	144864172	-832	SINE(MIR)chr3:144865004	-	D
in silico	InSilicoRandom	InSilicoRandom	3	157363810	-32	LINE(L2)chr3:157363842	-	C
in silico	InSilicoRandom	InSilicoRandom	3	114800150	305	LINE(L1)chr3:114799496	+	D
in silico	InSilicoRandom	InSilicoRandom	3	45894193	87	LINE(L1)chr3:45893623	+	C
in silico	InSilicoRandom	InSilicoRandom	3	82520908	0	LTR(ERV1)chr3:82520779	-	A
in silico	InSilicoRandom	InSilicoRandom	3	66424296	-283	DNA(TcMar-Tigger)chr3:66424578	+	D
in silico	InSilicoRandom	InSilicoRandom	3	56456431	-304	SINE(MIR)chr3:56456734	+	D
in silico	InSilicoRandom	InSilicoRandom	3	31298782	-695	Simple_repeat(Simple_repeat)chr3:31299476	+	D
in silico	InSilicoRandom	InSilicoRandom	3	130929376	0	LINE(L1)chr3:130926436	-	A
in silico	InSilicoRandom	InSilicoRandom	3	140309265	0	LINE(L1)chr3:140309050	+	A
in silico	InSilicoRandom	InSilicoRandom	3	78314035	0	LINE(L1)chr3:78311970	-	A
in silico	InSilicoRandom	InSilicoRandom	3	84292375	0	LINE(CR1)chr3:84292088	+	A
in silico	InSilicoRandom	InSilicoRandom	3	38961875	-27	SINE(Alu)chr3:38961901	+	C
in silico	InSilicoRandom	InSilicoRandom	3	2027872	-371	SINE(Alu)chr3:2028242	+	D
in silico	InSilicoRandom	InSilicoRandom	3	185786480	244	LINE(L1)chr3:185785964	+	D
in silico	InSilicoRandom	InSilicoRandom	3	1167559	-536	LINE(L2)chr3:1168094	+	D
in silico	InSilicoRandom	InSilicoRandom	3	150993757	-64	DNA(hAT-Blackjack)chr3:150993821	-	C
in silico	InSilicoRandom	InSilicoRandom	3	64903882	-313	SINE(MIR)chr3:64904194	+	D
in silico	InSilicoRandom	InSilicoRandom	3	149113337	885	LINE(L1)chr3:149112126	+	D
in silico	InSilicoRandom	InSilicoRandom	3	53607623	0	LINE(L2)chr3:53607334	+	A
in silico	InSilicoRandom	InSilicoRandom	3	111300805	0	LTR(ERVL)chr3:111300662	-	A
in silico	InSilicoRandom	InSilicoRandom	3	90148193	0	SINE(MIR)chr3:90148130	-	A
in silico	InSilicoRandom	InSilicoRandom	3	174103090	14	LTR(ERVL-MaLR)chr3:174102658	-	B
in silico	InSilicoRandom	InSilicoRandom	3	145683151	-169	SINE(Alu)chr3:145683319	+	D
in silico	InSilicoRandom	InSilicoRandom	3	169765367	0	LINE(L1)chr3:169765364	+	A
in silico	InSilicoRandom	InSilicoRandom	3	60566219	-132	SINE(MIR)chr3:60566350	+	C
in silico	InSilicoRandom	InSilicoRandom	3	63652311	2	SINE(Alu)chr3:63652001	+	B
in silico	InSilicoRandom	InSilicoRandom	3	173445646	-644	LTR(ERVL-MaLR)chr3:173446289	+	D
in silico	InSilicoRandom	InSilicoRandom	3	144256040	0	LINE(L2)chr3:144255931	+	A
in silico	InSilicoRandom	InSilicoRandom	3	35858844	217	SINE(Alu)chr3:35858513	-	D
in silico	InSilicoRandom	InSilicoRandom	3	182759793	-668	SINE(MIR)chr3:182760460	+	D
in silico	InSilicoRandom	InSilicoRandom	3	135193690	0	LINE(L1)chr3:135193623	-	A
in silico	InSilicoRandom	InSilicoRandom	3	82740424	-893	SINE(MIR)chr3:82741317	-	D
in silico	InSilicoRandom	InSilicoRandom	3	15164459	0	SINE(MIR)chr3:15164338	+	A
in silico	InSilicoRandom	InSilicoRandom	3	173673680	-264	SINE(MIR)chr3:173673944	-	D
in silico	InSilicoRandom	InSilicoRandom	3	39081168	0	LINE(L1)chr3:39080876	+	A
in silico	InSilicoRandom	InSilicoRandom	3	20421990	0	LTR(ERVL-MaLR)chr3:20421797	-	A
in silico	InSilicoRandom	InSilicoRandom	3	86771488	0	LTR(ERVL-MaLR)chr3:86771471	+	A
in silico	InSilicoRandom	InSilicoRandom	3	36433683	0	LINE(L2)chr3:36433391	+	A
in silico	InSilicoRandom	InSilicoRandom	3	41810829	334	DNA(TcMar-Tigger)chr3:41810398	-	D
in silico	InSilicoRandom	InSilicoRandom	3	95621206	-273	LINE(L1)chr3:95621478	+	D
in silico	InSilicoRandom	InSilicoRandom	3	144344413	-286	Simple_repeat(Simple_repeat)chr3:144344698	+	D
in silico	InSilicoRandom	InSilicoRandom	3	174491972	0	LTR(ERV1)chr3:174491630	-	A
in silico	InSilicoRandom	InSilicoRandom	3	54164700	12	SINE(MIR)chr3:54164536	-	B
in silico	InSilicoRandom	InSilicoRandom	3	15938264	-38	LTR(ERVL-MaLR)chr3:15938301	+	C
in silico	InSilicoRandom	InSilicoRandom	3	142168170	243	LINE(L2)chr3:142167805	+	D
in silico	InSilicoRandom	InSilicoRandom	3	120760381	211	LINE(L1)chr3:120759996	-	D
in silico	InSilicoRandom	InSilicoRandom	3	192155505	0	SINE(Alu)chr3:192155199	+	A
in silico	InSilicoRandom	InSilicoRandom	3	177568960	-551	SINE(MIR)chr3:177569510	+	D
in silico	InSilicoRandom	InSilicoRandom	3	169084563	-2567	SINE(Alu)chr3:169087130	-	D
in silico	InSilicoRandom	InSilicoRandom	3	13750527	6704	LTR(ERVL-MaLR)chr3:13743585	+	D
in silico	InSilicoRandom	InSilicoRandom	3	99286218	-79	LINE(L1)chr3:99286297	-	C
in silico	InSilicoRandom	InSilicoRandom	3	188308771	186	DNA(hAT-Charlie)chr3:188308386	-	D
in silico	InSilicoRandom	InSilicoRandom	3	159366640	-38	LTR(ERVL-MaLR)chr3:159366677	+	C
in silico	InSilicoRandom	InSilicoRandom	3	69341520	30	LINE(L2)chr3:69341410	-	C
in silico	InSilicoRandom	InSilicoRandom	3	197666887	0	SINE(Alu)chr3:197666874	-	A
in silico	InSilicoRandom	InSilicoRandom	3	24049938	0	SINE(Alu)chr3:24049708	-	A
in silico	InSilicoRandom	InSilicoRandom	3	183168694	0	LINE(L1)chr3:183168679	-	A
in silico	InSilicoRandom	InSilicoRandom	3	141792116	0	SINE(Alu)chr3:141791947	-	A
in silico	InSilicoRandom	InSilicoRandom	3	160856333	99	SINE(Alu)chr3:160855925	-	C
in silico	InSilicoRandom	InSilicoRandom	3	97059420	0	LTR(ERVL-MaLR)chr3:97059411	-	A
in silico	InSilicoRandom	InSilicoRandom	3	97923902	252	DNA(hAT-Charlie)chr3:97923533	+	D
in silico	InSilicoRandom	InSilicoRandom	3	578994	0	DNA(hAT-Charlie)chr3:578933	+	A
in silico	InSilicoRandom	InSilicoRandom	3	12681460	0	LINE(L1)chr3:12680539	+	A
in silico	InSilicoRandom	InSilicoRandom	3	126404782	0	LTR(ERVL-MaLR)chr3:126404502	+	A
in silico	InSilicoRandom	InSilicoRandom	3	93573257	0	LTR(ERVL-MaLR)chr3:93572865	-	A
in silico	InSilicoRandom	InSilicoRandom	3	79857375	0	LINE(L2)chr3:79857370	-	A
in silico	InSilicoRandom	InSilicoRandom	3	53054467	3	SINE(Alu)chr3:53054133	+	B
in silico	InSilicoRandom	InSilicoRandom	3	101729302	0	LINE(L1)chr3:101727048	+	A
in silico	InSilicoRandom	InSilicoRandom	3	52524487	936	Simple_repeat(Simple_repeat)chr3:52523391	+	D
in silico	InSilicoRandom	InSilicoRandom	3	173396427	-54	LINE(L2)chr3:173396481	-	C
in silico	InSilicoRandom	InSilicoRandom	3	128678635	-26	LTR(ERV1)chr3:128678660	+	C
in silico	InSilicoRandom	InSilicoRandom	3	45797846	190	DNA(hAT-Charlie)chr3:45797491	-	D
in silico	InSilicoRandom	InSilicoRandom	3	102942511	0	LINE(L1)chr3:102939292	+	A
in silico	InSilicoRandom	InSilicoRandom	3	85192836	-32	LINE(L2)chr3:85192867	+	C
in silico	InSilicoRandom	InSilicoRandom	3	59932342	0	LINE(L1)chr3:59930242	-	A
in silico	InSilicoRandom	InSilicoRandom	3	181957511	729	SINE(MIR)chr3:181956717	-	D
in silico	InSilicoRandom	InSilicoRandom	3	78583990	0	LINE(L1)chr3:78583964	-	A
in silico	InSilicoRandom	InSilicoRandom	10	118161485	121	LINE(L2)chr10:118160088	-	C
in silico	InSilicoRandom	InSilicoRandom	10	1999923	0	SINE(Alu)chr10:1999683	-	A
in silico	InSilicoRandom	InSilicoRandom	10	49942681	-28	DNA(hAT-Charlie)chr10:49942709	-	C
in silico	InSilicoRandom	InSilicoRandom	10	125082903	0	LINE(L1)chr10:125081808	-	A
in silico	InSilicoRandom	InSilicoRandom	10	123650085	1	LINE(L1)chr10:123649956	+	B
in silico	InSilicoRandom	InSilicoRandom	10	22412070	0	LINE(L1)chr10:22408380	-	A
in silico	InSilicoRandom	InSilicoRandom	10	66806796	0	LTR(ERV1)chr10:66806645	-	A
in silico	InSilicoRandom	InSilicoRandom	10	131044361	0	LINE(L1)chr10:131043525	+	A
in silico	InSilicoRandom	InSilicoRandom	10	65306689	0	SINE(Alu)chr10:65306686	-	A
in silico	InSilicoRandom	InSilicoRandom	10	11188422	1538	SINE(Alu)chr10:11186574	+	D
in silico	InSilicoRandom	InSilicoRandom	10	128805319	-934	DNA(hAT-Charlie)chr10:128806253	-	D
in silico	InSilicoRandom	InSilicoRandom	10	45151672	55	LINE(L1)chr10:45149311	-	C
in silico	InSilicoRandom	InSilicoRandom	10	128301649	-131	SINE(Alu)chr10:128301780	-	C
in silico	InSilicoRandom	InSilicoRandom	10	12952805	0	SINE(Alu)chr10:12952611	-	A
in silico	InSilicoRandom	InSilicoRandom	10	84429280	-124	SINE(Alu)chr10:84429403	+	C
in silico	InSilicoRandom	InSilicoRandom	10	51286129	0	SINE(Alu)chr10:51285971	-	A
in silico	InSilicoRandom	InSilicoRandom	10	95088307	481	SINE(Alu)chr10:95087510	-	D
in silico	InSilicoRandom	InSilicoRandom	10	76116923	0	LTR(ERVL)chr10:76116664	+	A
in silico	InSilicoRandom	InSilicoRandom	10	6667653	0	LTR(ERV1)chr10:6667478	-	A
in silico	InSilicoRandom	InSilicoRandom	10	70418520	-11	SINE(Alu)chr10:70418530	+	B
in silico	InSilicoRandom	InSilicoRandom	10	8718537	278	LTR(ERVL-MaLR)chr10:8717884	-	D
in silico	InSilicoRandom	InSilicoRandom	10	86403639	-254	LINE(L1)chr10:86403893	-	D
in silico	InSilicoRandom	InSilicoRandom	10	61654931	0	SINE(Alu)chr10:61654777	+	A
in silico	InSilicoRandom	InSilicoRandom	10	105218204	-619	Simple_repeat(Simple_repeat)chr10:105218822	+	D
in silico	InSilicoRandom	InSilicoRandom	10	69727810	0	LINE(L1)chr10:69727743	+	A
in silico	InSilicoRandom	InSilicoRandom	10	69208950	0	LINE(L1)chr10:69208661	+	A
in silico	InSilicoRandom	InSilicoRandom	10	129794514	387	Simple_repeat(Simple_repeat)chr10:129794087	+	D
in silico	InSilicoRandom	InSilicoRandom	10	89002134	0	LINE(L1)chr10:89001678	+	A
in silico	InSilicoRandom	InSilicoRandom	10	9576179	58	LTR(ERVL-MaLR)chr10:9574964	-	C
in silico	InSilicoRandom	InSilicoRandom	10	85475847	0	LINE(L1)chr10:85475438	+	A
in silico	InSilicoRandom	InSilicoRandom	10	32316289	-98	LINE(L1)chr10:32316386	+	C
in silico	InSilicoRandom	InSilicoRandom	10	16568491	119	SINE(Alu)chr10:16568048	-	C
in silico	InSilicoRandom	InSilicoRandom	10	94502054	0	LINE(L2)chr10:94502036	-	A
in silico	InSilicoRandom	InSilicoRandom	10	48272112	0	LINE(CR1)chr10:48271791	-	A
in silico	InSilicoRandom	InSilicoRandom	10	96377439	0	LTR(ERV1)chr10:96377421	-	A
in silico	InSilicoRandom	InSilicoRandom	10	77538596	-105	SINE(MIR)chr10:77538701	-	C
in silico	InSilicoRandom	InSilicoRandom	10	74807936	-82	SINE(Alu)chr10:74808018	-	C
in silico	InSilicoRandom	InSilicoRandom	10	54555516	0	LINE(L1)chr10:54555001	-	A
in silico	InSilicoRandom	InSilicoRandom	10	101617650	0	LTR(ERVL-MaLR)chr10:101617516	+	A
in silico	InSilicoRandom	InSilicoRandom	10	610261	0	LINE(L1)chr10:610232	-	A
in silico	InSilicoRandom	InSilicoRandom	20	23594746	0	DNA(hAT-Charlie)chr20:23594742	-	A
in silico	InSilicoRandom	InSilicoRandom	20	20564346	-103	DNA(TcMar-Tigger)chr20:20564449	-	C
in silico	InSilicoRandom	InSilicoRandom	20	13797514	-1646	SINE(Alu)chr20:13799159	+	D
in silico	InSilicoRandom	InSilicoRandom	20	24347076	1395	LINE(L1)chr20:24345579	-	D
in silico	InSilicoRandom	InSilicoRandom	20	46925751	655	LTR(ERVL-MaLR)chr20:46924765	-	D
in silico	InSilicoRandom	InSilicoRandom	20	55040364	0	SINE(Alu)chr20:55040342	+	A
in silico	InSilicoRandom	InSilicoRandom	20	22017632	-85	SINE(Alu)chr20:22017717	-	C
in silico	InSilicoRandom	InSilicoRandom	20	60847670	0	Simple_repeat(Simple_repeat)chr20:60847644	+	A
in silico	InSilicoRandom	InSilicoRandom	20	36412165	0	LINE(L1)chr20:36411613	-	A
in silico	InSilicoRandom	InSilicoRandom	20	60091323	-689	LINE(L1)chr20:60092012	-	D
in silico	InSilicoRandom	InSilicoRandom	20	40491474	0	SINE(MIR)chr20:40491361	+	A
in silico	InSilicoRandom	InSilicoRandom	20	59118717	0	LINE(L1)chr20:59118642	-	A
in silico	InSilicoRandom	InSilicoRandom	20	25463090	0	SINE(Alu)chr20:25462963	-	A
in silico	InSilicoRandom	InSilicoRandom	20	42440382	0	LTR(ERV1)chr20:42440248	-	A
in silico	InSilicoRandom	InSilicoRandom	20	47121540	61	SINE(MIR)chr20:47121439	-	C
in silico	InSilicoRandom	InSilicoRandom	20	62095178	543	SINE(Alu)chr20:62094495	+	D
in silico	InSilicoRandom	InSilicoRandom	20	2905661	-9	LINE(L1)chr20:2905670	-	B
in silico	InSilicoRandom	InSilicoRandom	20	23890062	0	LINE(L1)chr20:23886203	-	A
in silico	InSilicoRandom	InSilicoRandom	20	38577050	0	LTR(ERVL-MaLR)chr20:38577024	-	A
in silico	InSilicoRandom	InSilicoRandom	20	48991267	0	SINE(MIR)chr20:48991107	-	A
in silico	InSilicoRandom	InSilicoRandom	20	16045131	133	DNA(hAT-Charlie)chr20:16044876	+	C
in silico	InSilicoRandom	InSilicoRandom	20	32328571	0	SINE(Alu)chr20:32328309	-	A
in silico	InSilicoRandom	InSilicoRandom	20	25661494	0	LTR(ERV1)chr20:25661435	+	A
in silico	InSilicoRandom	InSilicoRandom	20	40975718	0	SINE(MIR)chr20:40975673	+	A
in silico	InSilicoRandom	InSilicoRandom	20	482658	78	DNA(hAT-Charlie)chr20:482423	-	C
in silico	InSilicoRandom	InSilicoRandom	20	9912951	-373	LINE(L1)chr20:9913323	+	D
in silico	InSilicoRandom	InSilicoRandom	20	50943116	432	DNA(TcMar?)chr20:50942267	-	D
in silico	InSilicoRandom	InSilicoRandom	20	62742263	-69	SINE(Alu)chr20:62742331	+	C
in silico	InSilicoRandom	InSilicoRandom	20	48759355	0	LINE(L2)chr20:48759287	-	A
in silico	InSilicoRandom	InSilicoRandom	20	23700949	0	LINE(L1)chr20:23700202	-	A
in silico	InSilicoRandom	InSilicoRandom	20	60721778	0	SINE(Alu)chr20:60721661	-	A
in silico	InSilicoRandom	InSilicoRandom	20	36309960	8	SINE(MIR)chr20:36309839	-	B
in silico	InSilicoRandom	InSilicoRandom	20	31907097	0	SINE(Alu)chr20:31907093	+	A
in silico	InSilicoRandom	InSilicoRandom	20	39166315	217	LTR(ERVL-MaLR)chr20:39165782	-	D
in silico	InSilicoRandom	InSilicoRandom	20	24339079	-137	LINE(L1)chr20:24339216	-	C
in silico	InSilicoRandom	InSilicoRandom	20	36789897	97	Simple_repeat(Simple_repeat)chr20:36789775	+	C
in silico	InSilicoRandom	InSilicoRandom	20	51426743	0	SINE(MIR)chr20:51426636	-	A
in silico	InSilicoRandom	InSilicoRandom	20	31681841	0	LINE(L1)chr20:31681760	-	A
in silico	InSilicoRandom	InSilicoRandom	20	16946934	153	LTR(ERV1)chr20:16945949	+	D
in silico	InSilicoRandom	InSilicoRandom	20	40602656	0	LINE(CR1)chr20:40602643	+	A
in silico	InSilicoRandom	InSilicoRandom	17	398126	-341	SINE(Alu)chr17:398466	+	D
in silico	InSilicoRandom	InSilicoRandom	17	74368693	0	LINE(L1)chr17:74368245	-	A
in silico	InSilicoRandom	InSilicoRandom	17	47476787	0	SINE(Alu)chr17:47476628	-	A
in silico	InSilicoRandom	InSilicoRandom	17	6674338	-184	LINE(L2)chr17:6674521	+	D
in silico	InSilicoRandom	InSilicoRandom	17	33362092	-55	SINE(Alu)chr17:33362146	+	C
in silico	InSilicoRandom	InSilicoRandom	17	9926896	0	LINE(L1)chr17:9926651	+	A
in silico	InSilicoRandom	InSilicoRandom	17	63787447	-20	DNA(hAT-Charlie)chr17:63787466	+	C
in silico	InSilicoRandom	InSilicoRandom	17	10760386	0	LINE(L1)chr17:10760251	+	A
in silico	InSilicoRandom	InSilicoRandom	17	18679842	0	LINE(L1)chr17:18679831	-	A
in silico	InSilicoRandom	InSilicoRandom	17	60655825	405	SINE(Alu)chr17:60655125	+	D
in silico	InSilicoRandom	InSilicoRandom	17	5077473	-967	DNA(hAT-Charlie)chr17:5078439	+	D
in silico	InSilicoRandom	InSilicoRandom	17	68113715	115	LINE(L1)chr17:68112786	+	C
in silico	InSilicoRandom	InSilicoRandom	17	53376710	-295	SINE(Alu)chr17:53377005	-	D
in silico	InSilicoRandom	InSilicoRandom	17	7149842	726	SINE(Alu)chr17:7148806	-	D
in silico	InSilicoRandom	InSilicoRandom	17	69011589	-249	SINE(MIR)chr17:69011837	+	D
in silico	InSilicoRandom	InSilicoRandom	17	17800448	0	DNA(TcMar-Tigger)chr17:17800223	+	A
in silico	InSilicoRandom	InSilicoRandom	17	39733333	-116	SINE(MIR)chr17:39733448	+	C
in silico	InSilicoRandom	InSilicoRandom	17	76447253	-1102	LINE(L1)chr17:76448354	+	D
in silico	InSilicoRandom	InSilicoRandom	17	61683556	-340	SINE(Alu)chr17:61683896	-	D
in silico	InSilicoRandom	InSilicoRandom	17	53401320	-832	Simple_repeat(Simple_repeat)chr17:53402151	+	D
in silico	InSilicoRandom	InSilicoRandom	17	52208529	0	LINE(L1)chr17:52204900	-	A
in silico	InSilicoRandom	InSilicoRandom	17	26231929	971	DNA(hAT-Charlie)chr17:26230912	+	D
in silico	InSilicoRandom	InSilicoRandom	17	14492920	-645	SINE(Alu)chr17:14493564	+	D
in silico	InSilicoRandom	InSilicoRandom	17	31572737	0	LINE(L2)chr17:31572419	-	A
in silico	InSilicoRandom	InSilicoRandom	17	61588907	0	SINE(Alu)chr17:61588803	-	A
in silico	InSilicoRandom	InSilicoRandom	17	30410370	340	SINE(MIR)chr17:30409923	-	D
in silico	InSilicoRandom	InSilicoRandom	17	30415296	-206	DNA(hAT-Charlie)chr17:30415502	-	D
in silico	InSilicoRandom	InSilicoRandom	17	29253476	0	SINE(MIR)chr17:29253458	+	A
in silico	InSilicoRandom	InSilicoRandom	17	28367334	0	LTR(ERV1)chr17:28366110	+	A
in silico	InSilicoRandom	InSilicoRandom	17	50260696	0	SINE(MIR)chr17:50260593	-	A
in silico	InSilicoRandom	InSilicoRandom	17	49035349	0	SINE(Alu)chr17:49035104	-	A
in silico	InSilicoRandom	InSilicoRandom	17	53346524	-385	SINE(MIR)chr17:53346908	+	D
in silico	InSilicoRandom	InSilicoRandom	17	69477737	-334	DNA(hAT-Charlie)chr17:69478071	-	D
in silico	InSilicoRandom	InSilicoRandom	17	80014982	-4903	Simple_repeat(Simple_repeat)chr17:80019884	+	D
in silico	InSilicoRandom	InSilicoRandom	17	79239303	98	SINE(Alu)chr17:79238898	+	C
in silico	InSilicoRandom	InSilicoRandom	17	8477358	0	LINE(L1)chr17:8477176	+	A
in silico	InSilicoRandom	InSilicoRandom	17	38239674	0	SINE(Alu)chr17:38239619	-	A
in silico	InSilicoRandom	InSilicoRandom	17	36747473	-154	LINE(CR1)chr17:36747627	-	D
in silico	InSilicoRandom	InSilicoRandom	17	40196524	0	SINE(Alu)chr17:40196352	+	A
in silico	InSilicoRandom	InSilicoRandom	17	42595746	0	SINE(Alu)chr17:42595646	+	A
in silico	InSilicoRandom	InSilicoRandom	17	41944537	0	LINE(L1)chr17:41944160	-	A
in silico	InSilicoRandom	InSilicoRandom	17	64101926	0	LINE(L1)chr17:64101922	+	A
in silico	InSilicoRandom	InSilicoRandom	17	33096500	0	SINE(Alu)chr17:33096471	-	A
in silico	InSilicoRandom	InSilicoRandom	17	37572474	216	SINE(Alu)chr17:37572093	+	D
in silico	InSilicoRandom	InSilicoRandom	17	42748780	0	SINE(Alu)chr17:42748760	+	A
in silico	InSilicoRandom	InSilicoRandom	17	26488249	-801	SINE(Alu)chr17:26489050	-	D
in silico	InSilicoRandom	InSilicoRandom	17	75832390	-38	SINE(Alu)chr17:75832427	+	C
in silico	InSilicoRandom	InSilicoRandom	17	63865374	-319	SINE(Alu)chr17:63865693	-	D
in silico	InSilicoRandom	InSilicoRandom	17	45140318	0	DNA(hAT-Charlie)chr17:45140300	+	A
in silico	InSilicoRandom	InSilicoRandom	17	52652907	0	LTR(Gypsy)chr17:52652832	-	A
in silico	InSilicoRandom	InSilicoRandom	17	54838322	231	SINE(Alu)chr17:54837812	+	D
in silico	InSilicoRandom	InSilicoRandom	17	26368817	0	Simple_repeat(Simple_repeat)chr17:26368812	+	A
in silico	InSilicoRandom	InSilicoRandom	17	65108967	0	LINE(L2)chr17:65108772	-	A
in silico	InSilicoRandom	InSilicoRandom	17	5491329	468	LINE(L2)chr17:5490454	+	D
in silico	InSilicoRandom	InSilicoRandom	17	77775854	52	SINE(MIR)chr17:77775640	-	C
in silico	InSilicoRandom	InSilicoRandom	17	45164735	-81	LINE(L1)chr17:45164816	-	C
in silico	InSilicoRandom	InSilicoRandom	17	50634754	0	LTR(ERVL-MaLR)chr17:50634596	+	A
in silico	InSilicoRandom	InSilicoRandom	17	11315572	0	SINE(MIR)chr17:11315403	+	A
in silico	InSilicoRandom	InSilicoRandom	17	33583218	0	SINE(Alu)chr17:33583095	+	A
in silico	InSilicoRandom	InSilicoRandom	17	53010079	0	SINE(Alu)chr17:53009886	-	A
in silico	InSilicoRandom	InSilicoRandom	17	61970181	174	DNA(hAT-Charlie)chr17:61969838	+	D
in silico	InSilicoRandom	InSilicoRandom	17	7348834	-665	DNA(hAT-Charlie)chr17:7349499	-	D
in silico	InSilicoRandom	InSilicoRandom	17	46821323	278	SINE(Alu)chr17:46820761	-	D
in silico	InSilicoRandom	InSilicoRandom	17	2527027	0	SINE(Alu)chr17:2526924	-	A
in silico	InSilicoRandom	InSilicoRandom	17	64550337	0	SINE(Alu)chr17:64550251	+	A
in silico	InSilicoRandom	InSilicoRandom	17	34066404	135	LINE(CR1)chr17:34066086	-	C
in silico	InSilicoRandom	InSilicoRandom	17	45759316	0	SINE(Alu)chr17:45759206	-	A
in silico	InSilicoRandom	InSilicoRandom	17	69992941	-231	LINE(L1)chr17:69993171	+	D
in silico	InSilicoRandom	InSilicoRandom	17	13724903	0	SINE(Alu)chr17:13724683	-	A
in silico	InSilicoRandom	InSilicoRandom	17	71926615	-405	LINE(L2)chr17:71927019	+	D
in silico	InSilicoRandom	InSilicoRandom	17	27735277	0	SINE(Alu)chr17:27735240	-	A
in silico	InSilicoRandom	InSilicoRandom	17	54206027	-10	DNA(hAT-Charlie)chr17:54206037	-	B
in silico	InSilicoRandom	InSilicoRandom	17	28556170	-72	DNA(TcMar-Tigger)chr17:28556242	-	C
in silico	InSilicoRandom	InSilicoRandom	17	69690941	0	LINE(L1)chr17:69690631	+	A
in silico	InSilicoRandom	InSilicoRandom	17	31299903	0	LTR(ERV1)chr17:31297534	+	A
in silico	InSilicoRandom	InSilicoRandom	17	48064922	0	SINE(MIR)chr17:48064864	+	A
in silico	InSilicoRandom	InSilicoRandom	17	9930704	-37	LTR(ERVL-MaLR)chr17:9930740	+	C
in silico	InSilicoRandom	InSilicoRandom	17	43179683	668	SINE(Alu)chr17:43178718	+	D
in silico	InSilicoRandom	InSilicoRandom	17	66107683	0	LINE(L1)chr17:66107527	-	A
in silico	InSilicoRandom	InSilicoRandom	17	399233	21	SINE(Alu)chr17:399077	+	C
